# Supplementary material for: Evolution of the molybdenum and vanadium cycles through time and their impact on ancient nitrogen fixation
Source: Research Square preprint supplement (doi:10.21203/rs.3.rs-7237238/v1), 2025-09-01
Supplement: Supplementary file 2 [file 4eb3564957645b948eda52cd.xlsx]

## Sheet: Sheet1
Plot Age (Ga)	Reference/Source	Location	Sample	Description	% TiO2	% Fe203	Mo(ppm)	V(ppm)
3.8	Dauphas et al., 2007	Nuvvuagittuq supracrustal belt, N. Quebec	IN05048	Aqp - pyroxene band in banded magnetite/banded pyroxene	0.01	7.2069	0.674975
3.8	Dauphas et al., 2007	Nuvvuagittuq supracrustal belt, N. Quebec	IN05007	Aqm - banded magnetite in banded magnetite/banded pyroxene	0.0100485	33.1597	0.880852
3.8	Dauphas et al., 2007	Nuvvuagittuq supracrustal belt, N. Quebec	IN05008	Aqm - banded magnetite in banded magnetite/banded pyroxene	0.0100485	31.6799	0.978281
3.8	Dauphas et al., 2007	Nuvvuagittuq supracrustal belt, N. Quebec	IN05010	Aqm - banded magnetite in banded magnetite/banded pyroxene	0.0100485	39.499	0.290637
3.8	Dauphas et al., 2007	Nuvvuagittuq supracrustal belt, N. Quebec	IN05009	Aqm - banded magnetite in banded magnetite/banded pyroxene	0.226115	34.6222	0.707793
3.8	O'neil et al., 2007	Nuvvuagittuq belt, Canada - Northeastern Superior Province	PC-199	BIF -finely laminated quartz, magnetite and grunerite rock, with thin alternating quartz-rich and magnetite-rich laminations 0.1–1 cm wide	0.03			9
3.8	O'neil et al., 2007	Nuvvuagittuq belt, Canada - Northeastern Superior Province	PC-198B	BIF -finely laminated quartz, magnetite and grunerite rock, with thin alternating quartz-rich and magnetite-rich laminations 0.1–1 cm wide	0.02			9
3.8	O'neil et al., 2007	Nuvvuagittuq belt, Canada - Northeastern Superior Province	PC-200	BIF -finely laminated quartz, magnetite and grunerite rock, with thin alternating quartz-rich and magnetite-rich laminations 0.1–1 cm wide	0.02			11
3.8	O'neil et al., 2007	Nuvvuagittuq belt, Canada - Northeastern Superior Province	PC-192	BIF -finely laminated quartz, magnetite and grunerite rock, with thin alternating quartz-rich and magnetite-rich laminations 0.1–1 cm wide	0.02			11
3.8	O'neil et al., 2007	Nuvvuagittuq belt, Canada - Northeastern Superior Province	PC-193	BIF -finely laminated quartz, magnetite and grunerite rock, with thin alternating quartz-rich and magnetite-rich laminations 0.1–1 cm wide	0.03			9
3.8	O'neil et al., 2007	Nuvvuagittuq belt, Canada - Northeastern Superior Province	PC-197	BIF -finely laminated quartz, magnetite and grunerite rock, with thin alternating quartz-rich and magnetite-rich laminations 0.1–1 cm wide	0.03			11
3.8	Mloszewska et al., 2012	Nuvvuagittuq supracrustal belt, N. Quebec	090709-4B2	BIF facies	0.007		5.63177	2.18955
3.8	Mloszewska et al., 2014	Nuvvuagittuq supracrustal belt, N. Quebec	090710-2	BIF facies	0.005		1.64981	2.43068
3.8	Mloszewska et al., 2015	Nuvvuagittuq supracrustal belt, N. Quebec	090710-4	BIF facies	0.012		1.5552	5.19226
3.8	Mloszewska et al., 2013	Nuvvuagittuq supracrustal belt, N. Quebec	090709-5	BIF facies	0.008		7.16373	2.35302
3.8	Mloszewska et al., 2016	Nuvvuagittuq supracrustal belt, N. Quebec	090710-12	BIF facies	0.018		3.29421	9.25827
3.75	Polat and Frei, 2005	Isua Greenstone Belt - Isua, SW Greenland	F			33.6		0.05
3.75	Polat and Frei, 2005	Isua Greenstone Belt - Isua, SW Greenland	E			54.1		0.06
3.75	Polat and Frei, 2005	Isua Greenstone Belt - Isua, SW Greenland	Q			35		0.103
3.75	Polat and Frei, 2005	Isua Greenstone Belt - Isua, SW Greenland	M			32.4		0.06
3.75	Polat and Frei, 2005	Isua Greenstone Belt - Isua, SW Greenland	O			32.6		0.043
3.75	Polat and Frei, 2005	Isua Greenstone Belt - Isua, SW Greenland	N			57.3		0.057
3.75	Polat and Frei, 2005	Isua Greenstone Belt - Isua, SW Greenland	491243-A			55.6		0.05
3.75	Polat and Frei, 2005	Isua Greenstone Belt - Isua, SW Greenland	H			69.9		0.04
3.75	Polat and Frei, 2005	Isua Greenstone Belt - Isua, SW Greenland	G			16.5		0.04
3.75	Polat and Frei, 2005	Isua Greenstone Belt - Isua, SW Greenland	P			70		0.065
3.75	Polat and Frei, 2005	Isua Greenstone Belt - Isua, SW Greenland	C			62.8		0.05
3.75	Polat and Frei, 2005	Isua Greenstone Belt - Isua, SW Greenland	K			79.2		0.03
3.75	Polat and Frei, 2005	Isua Greenstone Belt - Isua, SW Greenland	L			76.9		0.04
3.75	Dymek, and Klein, 1988	Isua Greenstone Belt - Greenland	623-6B	Quartz-magnetite iron-formation. Minerals compositions quartz, magnetite, cummingtonite/grunerite, ripidolite	<0.01	6.09	2	3.2
3.75	Dymek, and Klein, 1988	Isua Greenstone Belt - Greenland	623-7B	Quartz-magnetite iron-formation. Minerals compositions quartz, magnetite, cummingtonite/grunerite, ripidolite	0.01	24.5	3	5.4
3.75	Dymek, and Klein, 1988	Isua Greenstone Belt - Greenland	629-3B	Quartz-magnetite iron-formation. Minerals compositions quartz, magnetite, actnolite/hornblende, Ferroan talc + pyrite	0.01	24.2	4	4.5
3.75	Dymek, and Klein, 1988	Isua Greenstone Belt - Greenland	625-9B	Magnesian iron-formation. Minerals compositions quartz, cummingtonite/grunerite	<0.01	0.13	<4	2.4
3.75	Dymek, and Klein, 1988	Isua Greenstone Belt - Greenland	10-2A	Magnesian iron-formation. Minerals compositions quartz, cummingtonite/grunerite	<0.01	0.65	1	8.7
3.75	Dymek, and Klein, 1988	Isua Greenstone Belt - Greenland	711-4C	Magnesian iron-formation. Minerals compositions quartz, magnetite, cummingtonite/grunerite	0.02	4.79	3	18.8
3.75	Dymek, and Klein, 1988	Isua Greenstone Belt - Greenland	623-7A	Quartz-magnetite iron-formation. Minerals compositions quartz, magnetite, cummingtonite/grunerite, ripidolite	<0.01	12.1	2	4.2
3.75	Dymek, and Klein, 1988	Isua Greenstone Belt - Greenland	625-10	Magnesian iron-formation. Minerals compositions quartz, magnetite, cummingtonite/grunerite	0.01	14.8	2	3.7
3.75	Dymek, and Klein, 1988	Isua Greenstone Belt - Greenland	716-13	Quartz-magnetite iron-formation. Minerals compositions quartz, magnetite, actnolite/hornblende	0.02	21.2	3	7.6
3.75	Dymek, and Klein, 1988	Isua Greenstone Belt - Greenland	625-8C	Magnesian iron-formation. Minerals compositions quartz, magnetite, cummingtonite/grunerite	0.12	17.2	3	4.4
3.75	Dymek, and Klein, 1988	Isua Greenstone Belt - Greenland	10-2B	Quartz-magnetite iron-formation. Minerals compositions quartz, magnetite, cummingtonite/grunerite	<0.01	10.5	2	3
3.75	Dymek, and Klein, 1988	Isua Greenstone Belt - Greenland	7-4	Quartz-magnetite iron-formation. Minerals compositions quartz, magnetite, cummingtonite/grunerite, actnolite/hornblende	0.05	27.3	4	20.5
3.75	Dymek, and Klein, 1988	Isua Greenstone Belt - Greenland	809-1J	Quartz-magnetite iron-formation. Minerals compositions quartz, magnetite, cummingtonite/grunerite, actnolite/hornblende	0.11	21.4	3	23.8
3.75	Dymek, and Klein, 1988	Isua Greenstone Belt - Greenland	29-2	Quartz-magnetite iron-formation. Minerals compositions quartz, magnetite, cummingtonite/grunerite, actnolite/hornblende, ripidolite	<0.01	26	3	4.6
3.75	Dymek, and Klein, 1988	Isua Greenstone Belt - Greenland	701-2C	Quartz-magnetite iron-formation. Minerals compositions quartz, magnetite, cummingtonite/grunerite, ripidolite	<0.01	23.8	3	5,1
3.75	Polat and Frei, 2005	Isua Greenstone Belt - Isua, SW Greenland	D			43.9		0.06
3.75	Polat and Frei, 2005	Isua Greenstone Belt - Isua, SW Greenland	B			34.9		0.07
3.25	Hofmann, 2005	Fig Tree Group	FS5	Jaspilite	0.01	10.89		2.2
3.25	Hofmann, 2005	Fig Tree Group	FS8	Jaspilite	0.01	7.51		2.1
3.25	Hofmann, 2005	Fig Tree Group	AMC1	Chert		0.28		2.6
3.25	Hofmann, 2005	Fig Tree Group	AM6	Chert	0.03	0.52		5
3.25	Hofmann, 2005	Fig Tree Group	AM5	Chert	0.02	0.36		2.7
3.25	Hofmann, 2005	Fig Tree Group	AM9	Chert				10.2
3.25	Hofmann, 2005	Fig Tree Group	M3	Chert	0.01	3.32		2.2
3.25	Hofmann, 2005	Fig Tree Group	MC8	Chert	0.03	0.7		3.2
3.22	Bonnand et al., 2020	Moodies Group Barberton Greenstone Belt, South Africa	14-60 CC-d		0.394635		1.60189	49.8648
3.22	Bonnand et al., 2020	Moodies Group Barberton Greenstone Belt, South Africa	14-30 CC		0.0435385		0.883111	62.3928
3.22	Bonnand et al., 2020	Moodies Group Barberton Greenstone Belt, South Africa	14-26 SB		0.161277		0.625072	29.4439
3.22	Bonnand et al., 2020	Moodies Group Barberton Greenstone Belt, South Africa	14-60 CC-b		0.0221797		1.07525	2.97405
3.22	Bonnand et al., 2020	Moodies Group Barberton Greenstone Belt, South Africa	14-43 SB		0.0193431		0.655759	1.72906
3.22	Bonnand et al., 2020	Moodies Group Barberton Greenstone Belt, South Africa	14-40 SB		0.160095		0.335569	25.5478
3.22	Bonnand et al., 2020	Moodies Group Barberton Greenstone Belt, South Africa	14-39 SB		0.149485		0.442092	26.8679
3.22	Bonnand et al., 2020	Moodies Group Barberton Greenstone Belt, South Africa	14-37 SB		0.307636		0.495746	69.9366
3.22	Bonnand et al., 2020	Moodies Group Barberton Greenstone Belt, South Africa	14-36 SB-C		0.0201512		0.594498	4.44297
3.22	Bonnand et al., 2020	Moodies Group Barberton Greenstone Belt, South Africa	14-36 SB		0.0408693		0.902323	12.701
3.22	Bonnand et al., 2020	Moodies Group Barberton Greenstone Belt, South Africa	14-27 SB		0.191695		0.526418	23.9357
3.22	Bonnand et al., 2020	Moodies Group Barberton Greenstone Belt, South Africa	14-29 CC		0.106142		0.935893	135.114
3.22	Bonnand et al., 2020	Moodies Group Barberton Greenstone Belt, South Africa	14-32 CC		0.0513757		0.576839	14.0254
3.22	Bonnand et al., 2020	Moodies Group Barberton Greenstone Belt, South Africa	14-60 CC-a		0.0625342		1.15226	28.7063
3.22	Bonnand et al., 2020	Moodies Group Barberton Greenstone Belt, South Africa	14-46 CC		0.0210772		1.35368	2.95233
3.22	Bonnand et al., 2020	Moodies Group Barberton Greenstone Belt, South Africa	14-47 CC!		0.0238467		1.44384	3.04118
3.22	Bonnand et al., 2020	Moodies Group Barberton Greenstone Belt, South Africa	14-48 CC		0.025739		0.645347	8.49602
3.22	Bonnand et al., 2020	Moodies Group Barberton Greenstone Belt, South Africa	14-49 CC		0.027241		1.17572	3.85286
3.22	Bonnand et al., 2020	Moodies Group Barberton Greenstone Belt, South Africa	14-50 CC		0.0282016		0.410409	2.42769
3.22	Bonnand et al., 2020	Moodies Group Barberton Greenstone Belt, South Africa	14-51 CC		0.0236077		0.776731	2.76076
3.22	Bonnand et al., 2020	Moodies Group Barberton Greenstone Belt, South Africa	14-51a CC		0.0622033		0.653037	13.4827
3.22	Bonnand et al., 2020	Moodies Group Barberton Greenstone Belt, South Africa	14-52 CC		0.0168181		0.635075	0.521315
3.22	Bonnand et al., 2020	Moodies Group Barberton Greenstone Belt, South Africa	14-54 CC		0.0176842		1.41018	2.11156
3.22	Bonnand et al., 2020	Moodies Group Barberton Greenstone Belt, South Africa	14-55 CC		0.160406		0.597372	40.1037
3.22	Bonnand et al., 2020	Moodies Group Barberton Greenstone Belt, South Africa	14-60 CC-c		0.135026		1.05213	62.3533
3.22	Bonnand et al., 2020	Moodies Group Barberton Greenstone Belt, South Africa	14-25b SB-I		0.167581		0.663307	44.2101
3.22	Bonnand et al., 2020	Moodies Group Barberton Greenstone Belt, South Africa	14-2 DSR		0.137629		1.96876	32.2634
3.22	Bonnand et al., 2020	Moodies Group Barberton Greenstone Belt, South Africa	14-44 SB		0.0211115		1.04194	3.44634
3.22	Bonnand et al., 2020	Moodies Group Barberton Greenstone Belt, South Africa	14-12a DSR-C		0.0168511		0.4205	0.957608
3.22	Bonnand et al., 2020	Moodies Group Barberton Greenstone Belt, South Africa	14-12b DSR-I		0.0640952		1.43205	19.6817
3.22	Bonnand et al., 2020	Moodies Group Barberton Greenstone Belt, South Africa	14-13 DSR		0.0576217		0.877258	16.8267
3.22	Bonnand et al., 2020	Moodies Group Barberton Greenstone Belt, South Africa	14-15 DSR		0.0428098		0.699689	13.1241
3.22	Bonnand et al., 2020	Moodies Group Barberton Greenstone Belt, South Africa	14-16 DSR		0.0791296		1.07458	18.2912
3.22	Bonnand et al., 2020	Moodies Group Barberton Greenstone Belt, South Africa	14-17 DSR		0.0340783		0.737344	6.0013
3.22	Bonnand et al., 2020	Moodies Group Barberton Greenstone Belt, South Africa	14-18 DSR		0.0476671		0.594346	11.1342
3.22	Bonnand et al., 2020	Moodies Group Barberton Greenstone Belt, South Africa	14-19 DSR		0.0306331		0.588241	6.92211
3.22	Bonnand et al., 2020	Moodies Group Barberton Greenstone Belt, South Africa	14-20 DSR		0.0426187		0.999971	10.2914
3.22	Bonnand et al., 2020	Moodies Group Barberton Greenstone Belt, South Africa	14-21 DSR		0.0346585		0.550941	6.69611
3.22	Bonnand et al., 2020	Moodies Group Barberton Greenstone Belt, South Africa	14-45 SB		0.022228		0.918509	2.77258
3.22	Bonnand et al., 2020	Moodies Group Barberton Greenstone Belt, South Africa	14-3 DSR		0.0789838		1.03404	13.0029
3.22	Bonnand et al., 2020	Moodies Group Barberton Greenstone Belt, South Africa	14-4 DSR		0.0673418		1.0313	26.4661
3.22	Bonnand et al., 2020	Moodies Group Barberton Greenstone Belt, South Africa	14-5 DSR		0.0313727		0.818973	4.98376
3.22	Bonnand et al., 2020	Moodies Group Barberton Greenstone Belt, South Africa	14-6 DSR		0.0216589		0.635499	2.66691
3.22	Bonnand et al., 2020	Moodies Group Barberton Greenstone Belt, South Africa	14-7 DSR		0.0493657		0.784891	10.1477
3.22	Bonnand et al., 2020	Moodies Group Barberton Greenstone Belt, South Africa	14-8 DSR		0.0539096		1.20919	18.7965
3.22	Bonnand et al., 2020	Moodies Group Barberton Greenstone Belt, South Africa	14-9 DSR		0.0515558		1.00222	13.6306
3.22	Bonnand et al., 2020	Moodies Group Barberton Greenstone Belt, South Africa	14-25a SB-C		0.0194415		0.608334	2.40807
3.22	Bonnand et al., 2020	Moodies Group Barberton Greenstone Belt, South Africa	14-1 DSR		0.0990824		1.02831	20.0351
3.15	Bhattacharya et al., 2007	Iron Ore Group of Jharkhand–Orissa region (Gandhamardan)	H/1/1		0.04	48.71	0.46	20.27
3.15	Bhattacharya et al., 2007	Iron Ore Group of Jharkhand–Orissa region (Gandhamardan)	H/1/4		0.03	44.6	0.32	20.09
3.15	Bhattacharya et al., 2007	Iron Ore Group of Jharkhand–Orissa region (Gandhamardan)	H/1/3		0.02	49.83	0.24	20.07
3.15	Bhattacharya et al., 2007	Iron Ore Group of Jharkhand–Orissa region (Gandhamardan)	H/1/2		0.04	47.87	0.24	19.85
3.15	Bhattacharya et al., 2007	Iron Ore Group of Jharkhand–Orissa region ( Noamundi )	H/3/5		0.04	35.62	0.54	18.64
3.15	Bhattacharya et al., 2007	Iron Ore Group of Jharkhand–Orissa region (Gandhamardan)	H/1/5		0.03	47.04	0.46	20.1
3.15	Bhattacharya et al., 2007	Iron Ore Group of Jharkhand–Orissa region (Deo Nala)	H/2/1			41.96	2.58	30.98
3.15	Bhattacharya et al., 2007	Iron Ore Group of Jharkhand–Orissa region (Deo Nala)	H/2/2			41.75	7.88	50.67
3.15	Bhattacharya et al., 2007	Iron Ore Group of Jharkhand–Orissa region (Deo Nala)	H/2/3			44.51	11.01	52.96
3.15	Bhattacharya et al., 2007	Iron Ore Group of Jharkhand–Orissa region (Deo Nala)	H/2/4			40.09	2.7	37.6
3.15	Bhattacharya et al., 2007	Iron Ore Group of Jharkhand–Orissa region (Deo Nala)	H/2/6			42.95	4.15	45.75
3.15	Bhattacharya et al., 2007	Iron Ore Group of Jharkhand–Orissa region ( Noamundi )	H/3/1		0.03	36.79	0.59	15.33
3.15	Bhattacharya et al., 2007	Iron Ore Group of Jharkhand–Orissa region ( Noamundi )	H/3/2		0.02	36.69	0.46	34.53
3.15	Bhattacharya et al., 2007	Iron Ore Group of Jharkhand–Orissa region ( Noamundi )	H/3/3		0.03	40.71	0.47	33.31
3.15	Bhattacharya et al., 2007	Iron Ore Group of Jharkhand–Orissa region ( Noamundi )	H/3/4		0.03	38.79	0.56	19.34
3.15	Bhattacharya et al., 2007	Iron Ore Group of Jharkhand–Orissa region (Deo Nala)	H/2/5			39.61	8.7	31.67
3.12	Bhattacharya et al., 2007	Iron Ore Group of Jharkhand–Orissa region ( Garumahishani (oxide facies) )	H/4/1			50.42	0.92	1.11
3.12	Bhattacharya et al., 2007	Iron Ore Group of Jharkhand–Orissa region ( Garumahishani (chert) )	H/5/1		0.06	29.12	1.76	17.34
3.12	Bhattacharya et al., 2007	Iron Ore Group of Jharkhand–Orissa region ( Garumahishani (oxide facies) )	H/4/2			51.69	0.69	0.68
3.12	Bhattacharya et al., 2007	Iron Ore Group of Jharkhand–Orissa region ( Garumahishani (chert) )	H/5/5		0.05	33.64	1.21	17.26
3.12	Bhattacharya et al., 2007	Iron Ore Group of Jharkhand–Orissa region ( Garumahishani (chert) )	H/5/4		0.06	31.67	1.44	17.33
3.12	Bhattacharya et al., 2007	Iron Ore Group of Jharkhand–Orissa region ( Garumahishani (chert) )	H/5/3		0.06	32.22	1.61	17.29
3.12	Bhattacharya et al., 2007	Iron Ore Group of Jharkhand–Orissa region ( Garumahishani (chert) )	H/5/2		0.05	30.72	1.19	17.25
3.12	Bhattacharya et al., 2007	Iron Ore Group of Jharkhand–Orissa region ( Garumahishani (oxide facies) )	H/4/5			51.68	0.84	0.89
3.12	Bhattacharya et al., 2007	Iron Ore Group of Jharkhand–Orissa region ( Garumahishani (oxide facies) )	H/4/4			50.79	0.7	0.68
3.12	Bhattacharya et al., 2007	Iron Ore Group of Jharkhand–Orissa region ( Garumahishani (oxide facies) )	H/4/3			53.4	0.84	0.86
3.1	Sylvestre et al., 2017	northern margin of the Congo craton, Cameroon	KB7		0.1			23
3.1	Sylvestre et al., 2017	northern margin of the Congo craton, Cameroon	KB8		0.1			19
3.1	Sylvestre et al., 2017	northern margin of the Congo craton, Cameroon	KB6		0.07			16
3.1	Sylvestre et al., 2017	northern margin of the Congo craton, Cameroon	KB1		0.06			14
3.1	Sylvestre et al., 2017	northern margin of the Congo craton, Cameroon	KB2		0.07			15
3.1	Sylvestre et al., 2015	Elom BIF, Cameroon	LBR25		0.01			0.84
3.1	Sylvestre et al., 2015	Elom BIF, Cameroon	LBR108		0.01			0.96
3.1	Sylvestre et al., 2015	Elom BIF, Cameroon	LBR12		0.01			0.81
3.1	Sylvestre et al., 2015	Elom BIF, Cameroon	LBR16		0.01			0.89
3.1	Sylvestre et al., 2015	Elom BIF, Cameroon	LBR53		0.01			0.87
3.1	Sylvestre et al., 2015	Elom BIF, Cameroon	LBR62		0.14			0.85
3.1	Sylvestre et al., 2015	Elom BIF, Cameroon	LBR107		0.01			0.77
3.1	Sylvestre et al., 2015	Elom BIF, Cameroon	LBR133		0.01			1
3.1	Sylvestre et al., 2017	northern margin of the Congo craton, Cameroon	KB5		0.07			14
3.1	Sylvestre et al., 2017	northern margin of the Congo craton, Cameroon	KB4		0.09			20
3.1	Sylvestre et al., 2017	northern margin of the Congo craton, Cameroon	KB3		0.09			21
3.1	Teutsong et al., 2017	Bikoula BIF, sourthern Cameroon	L265		0.88		3.49	49.56
3.1	Teutsong et al., 2017	Bikoula BIF, sourthern Cameroon	L270		0.7		5.62	15.29
3.1	Teutsong et al., 2017	Bikoula BIF, sourthern Cameroon	L271		0.22		2.05	8.8
3.1	Teutsong et al., 2017	Bikoula BIF, sourthern Cameroon	L273		0.39		2.74	14.53
3.1	Teutsong et al., 2017	Bikoula BIF, sourthern Cameroon	L279		0.19		3.18	9.95
3.1	Teutsong et al., 2017	Bikoula BIF, sourthern Cameroon	L290		0.11		1.84	7.58
3.1	Teutsong et al., 2017	Bikoula BIF, sourthern Cameroon	L282		0.48		4.42	15.99
3.1	Teutsong et al., 2017	Bikoula BIF, sourthern Cameroon	L283		0.37		2.65	13.63
3.1	Teutsong et al., 2017	Bikoula BIF, sourthern Cameroon	L284		0.3		3.1	13.58
3.1	Teutsong et al., 2017	Bikoula BIF, sourthern Cameroon	L285		0.19		2.22	10.57
3.1	Teutsong et al., 2017	Bikoula BIF, sourthern Cameroon	L291		0.16		0.78	9.82
3.1	Teutsong et al., 2017	Bikoula BIF, sourthern Cameroon	L280		0.37		3.07	17.77
3.1	Ganno et al., 2018	Meyomessi BIF, Netm Complex, southern Cameroon	MGT96		0.02			0.96
3.1	Ganno et al., 2018	Meyomessi BIF, Netm Complex, southern Cameroon	MGT95		0.01			0.97
3.1	Ganno et al., 2018	Meyomessi BIF, Netm Complex, southern Cameroon	MGT94		1.14			0.73
3.1	Ganno et al., 2018	Meyomessi BIF, Netm Complex, southern Cameroon	MGT93		0.01			0.98
3.1	Ganno et al., 2018	Meyomessi BIF, Netm Complex, southern Cameroon	MGT92		0.01			0.97
3.1	Ganno et al., 2018	Meyomessi BIF, Netm Complex, southern Cameroon	MGT91		0.02			0.96
3	Dai et al., 2014	Northern China	DGSH-11*	Dagushan BIF, Quartz-magnetite BIFs	0.01			2.8
3	Dai et al., 2014	Northern China	DDGS-15	Dagushan BIF, High-grade iron ores	0.02			6.42
3	Dai et al., 2014	Northern China	DGSH06-13*	Dagushan BIF, Quartz-magnetite BIFs	0.01			2.11
3	Dai et al., 2014	Northern China	DDGS-16	Dagushan BIF, High-grade iron ores	0.03			6.31
3	Dai et al., 2014	Northern China	DDGS-17	Dagushan BIF, High-grade iron ores	0.01			5.59
3	Dai et al., 2014	Northern China	DGS-9-1	Dagushan BIF, Quartz-magnetite BIFs	0.05			20.4
3	Dai et al., 2014	Northern China	DGS-10-1	Dagushan BIF, Quartz-magnetite BIFs	0.02			4.86
3	Dai et al., 2014	Northern China	DGS-11-1	Dagushan BIF, Quartz-magnetite BIFs	0.03			9.15
3	Dai et al., 2014	Northern China	DGS-11-2	Dagushan BIF, Quartz-magnetite BIFs	0.02			9.32
3	Dai et al., 2014	Northern China	DGS-11-3	Dagushan BIF, Quartz-magnetite BIFs	0.02			5.22
2.91	Smith and Beukes, 2023	Ijzermijn IF, Pangola supergroup South Africa	273,49B	Fe-Mn-rich banded chert		7.53		17
2.91	Smith and Beukes, 2023	Ijzermijn IF, Pangola supergroup South Africa	273,9B	Fe-Mn-rich banded chert		5.96		19
2.91	Smith and Beukes, 2023	Ijzermijn IF, Pangola supergroup South Africa	273,49A	Fe-Mn-rich banded chert	0.01	8.83		19
2.9	Alexander et al., 2008	Pongola Supergroup, S.Africa (Iron Formation)	WM51		0.02	21		0.012
2.9	Alexander et al., 2008	Pongola Supergroup, S.Africa (Iron Formation)	WM111		0.02	17.7		0.011
2.9	Alexander et al., 2008	Pongola Supergroup, S.Africa (Iron Formation)	WM112		0.02	18.1		0.01
2.9	Alexander et al., 2008	Pongola Supergroup, S.Africa (Iron Formation)	WM132		0.02	15		0.037
2.9	Alexander et al., 2008	Pongola Supergroup, S.Africa (Iron Formation)	WM61		0.02	76.4		0.029
2.9	Alexander et al., 2008	Pongola Supergroup, S.Africa (Iron Formation)	WM62		0.02	76.3		0.031
2.9	Alexander et al., 2008	Pongola Supergroup, S.Africa (Iron Formation)	WM41		0.02	22.2		0.015
2.9	Alexander et al., 2008	Pongola Supergroup, S.Africa (Iron Formation)	WM72		0.02	26.1		0.012
2.9	Alexander et al., 2008	Pongola Supergroup, S.Africa (Iron Formation)	WM71		0.02	37.5		0.012
2.9	Alexander et al., 2008	Pongola Supergroup, S.Africa (Iron Formation)	WM121		0.02	12		0.005
2.9	Alexander et al., 2008	Pongola Supergroup, S.Africa (Iron Formation)	WM122		0.02	10.4		0.005
2.9	Alexander et al., 2008	Pongola Supergroup, S.Africa (Iron Formation)	WM52		0.02	81		0.021
2.9	Alexander et al., 2008	Pongola Supergroup, S.Africa (Iron Formation)	WM131		0.02	14.7		0.01
2.9	Alexander et al., 2008	Pongola Supergroup, S.Africa (Iron Formation)	WM102		0.02	17.3		0.018
2.9	Alexander et al., 2008	Pongola Supergroup, S.Africa (Iron Formation)	WM101		0.02	15.2		0.021
2.9	Alexander et al., 2008	Pongola Supergroup, S.Africa (Iron Formation)	WM42		0.08	57		0.104
2.9	Viehmann et al., 2015	Witwatersrand BIF, south Africa	TF1_4333.9a	Water Touwer IF		26.2	0.166
2.9	Viehmann et al., 2015	Witwatersrand BIF, south Africa	TF1_4331b	Water Touwer IF		65.2	0.684
2.9	Viehmann et al., 2015	Witwatersrand BIF, south Africa	TF1_378350mgt	Contorted Bed IF		75.5
2.9	Viehmann et al., 2015	Witwatersrand BIF, south Africa	TF1_3784.1b	Contorted Bed IF		23.3	0.0797
2.9	Viehmann et al., 2015	Witwatersrand BIF, south Africa	TF1_3784.1a	Contorted Bed IF		57.3	0.241
2.9	Viehmann et al., 2015	Witwatersrand BIF, south Africa	TF1_3783.5b	Contorted Bed IF		28.7	0.116
2.9	Viehmann et al., 2015	Witwatersrand BIF, south Africa	TF1_3775a	Contorted Bed IF		40.5	0.225
2.9	Viehmann et al., 2015	Witwatersrand BIF, south Africa	TF1_3768a	Contorted Bed IF		48.5	0.263
2.9	Viehmann et al., 2015	Witwatersrand BIF, south Africa	TF1_3783.5a	Contorted Bed IF		39.6	0.168
2.9	Viehmann et al., 2015	Witwatersrand BIF, south Africa	TF1_4331a	Water Touwer IF		41.6	0.45
2.9	Viehmann et al., 2015	Witwatersrand BIF, south Africa	TF1_4331e	Water Touwer IF		16.7	0.115
2.9	Viehmann et al., 2015	Witwatersrand BIF, south Africa	TF1_4332.75a	Water Touwer IF		69.6	0.453
2.9	Viehmann et al., 2015	Witwatersrand BIF, south Africa	TF1_4332.75b	Water Touwer IF		55.8	0.278
2.9	Viehmann et al., 2015	Witwatersrand BIF, south Africa	TF1_4332.75c	Water Touwer IF		63.5	0.371
2.9	Viehmann et al., 2015	Witwatersrand BIF, south Africa	TF1_4332.75d	Water Touwer IF		29.6	0.191
2.9	Viehmann et al., 2015	Witwatersrand BIF, south Africa	TF1_433275mgt	Water Touwer IF		67.6
2.9	Viehmann et al., 2015	Witwatersrand BIF, south Africa	TF1_4331c	Water Touwer IF		58.8	0.901
2.9	Viehmann et al., 2015	Witwatersrand BIF, south Africa	TF1_4331d	Water Touwer IF		17.4	0.116
2.9	Gourcerol et al., 2016	4B, Musselwhite	E599669		0.00286667		0.072	1.49
2.9	Gourcerol et al., 2016	4B, Musselwhite	E599655		0.00193333		0.016	1.33
2.9	Gourcerol et al., 2016	4B, Musselwhite	E599661		0.00921667		0.165	5.3
2.9	Gourcerol et al., 2016	4B, Musselwhite	E599671		0.000226		0.038	0.054
2.9	Gourcerol et al., 2016	4B, Musselwhite	E599672		0.000776667		0.134	0.229
2.9	Gourcerol et al., 2016	4E, Musselwhite	E599651		0.00183333		0.46	0.86
2.9	Gourcerol et al., 2016	4E, Musselwhite	E599652		0.00256667		0.95	0.94
2.9	Gourcerol et al., 2016	4EA, Musselwhite	E599654		0.00156167		0.32	0.92
2.9	Gourcerol et al., 2016	4EA, Musselwhite	E599659		0.000525		0.249	0.178
2.9	Gourcerol et al., 2016	4EA, Musselwhite	E599660		0.00285		0.445	1.66
2.9	Gourcerol et al., 2016	4EA, Musselwhite	E599665		0.00091		0.224	0.22
2.9	Gourcerol et al., 2016	4EA, Musselwhite	E599666		0.000578333		0.19	0.323
2.9	Gourcerol et al., 2016	4B, Musselwhite	E599656		0.000541667		1.28	0.24
2.9	Gourcerol et al., 2016	4B, Musselwhite	E599668		0.000308333		0.096	0.176
2.9	Gourcerol et al., 2016	4F, Musselwhite	E599664		0.00253333		3.9	2.77
2.9	Gourcerol et al., 2016	4F, Musselwhite	E599658		0.0308333		0.33	11.3
2.9	Gourcerol et al., 2016	4F, Musselwhite	E599657		0.00716667		0.21	5.53
2.9	Gourcerol et al., 2016	4EA, Musselwhite	E599667		0.000666667		0.56	0.233
2.9	Gourcerol et al., 2016	4B, Musselwhite	E599670		0.000335167		0.058	0.146
2.9	Haugaard et al., 2013	Itilliarsuk IF (W. Greenland)	902D/Si + Al		0.44	27.5
2.9	Haugaard et al., 2013	Itilliarsuk IF (W. Greenland)	902H/im		0.12	48.2
2.9	Haugaard et al., 2013	Itilliarsuk IF (W. Greenland)	902G/im + Al		0.39	43.2
2.9	Haugaard et al., 2013	Itilliarsuk IF (W. Greenland)	902F/im		0.21	46.6
2.9	Haugaard et al., 2013	Itilliarsuk IF (W. Greenland)	902E/Si + Al		0.43	24.3
2.9	Haugaard et al., 2013	Itilliarsuk IF (W. Greenland)	902C/im		0.22	42.4
2.9	Haugaard et al., 2013	Itilliarsuk IF (W. Greenland)	902B/Si + Al		0.28	32.2
2.9	Haugaard et al., 2013	Itilliarsuk IF (W. Greenland)	902A/Si + Al		0.36	35.6
2.9	Haugaard et al., 2013	Itilliarsuk IF (W. Greenland)	935A/Fe		0.11	64.1
2.9	Haugaard et al., 2013	Itilliarsuk IF (W. Greenland)	926/bulk		0.13	50.1
2.9	Haugaard et al., 2013	Itilliarsuk IF (W. Greenland)	935B/Si		0.07	26.3
2.9	Haugaard et al., 2013	Itilliarsuk IF (W. Greenland)	935C/Fe		0.1	70
2.9	Haugaard et al., 2013	Itilliarsuk IF (W. Greenland)	935J/Si		0.12	33.9
2.9	Haugaard et al., 2013	Itilliarsuk IF (W. Greenland)	935I/Fe		0.07	69.9
2.9	Haugaard et al., 2013	Itilliarsuk IF (W. Greenland)	935H/Si		0.05	29.4
2.9	Haugaard et al., 2013	Itilliarsuk IF (W. Greenland)	935G/Fe		0.07	61.6
2.9	Haugaard et al., 2013	Itilliarsuk IF (W. Greenland)	935F/Si		0.05	32.8
2.9	Haugaard et al., 2013	Itilliarsuk IF (W. Greenland)	935E/Fe		0.08	74.6
2.9	Haugaard et al., 2013	Itilliarsuk IF (W. Greenland)	935D/Si		0.1	29.5
2.85	Lascelles, 2006	Mount Gibson - Australia	503	cherty BIF. Drill holl: EHB02. Depth from:88, to: 93.44	0.06	47.55
2.85	Lascelles, 2006	Mount Gibson - Australia	632	magnetite-silicate BIF. Drill holl: EHR64. Depth from:237.23, to: 173.65	0.08	58.27		8
2.85	Lascelles, 2006	Mount Gibson - Australia	530	cherty BIF. Drill holl: EHB03. Depth from:142.44, to: 147.08	0.05	49.51		4
2.85	Lascelles, 2006	Mount Gibson - Australia	1489	cherty BIF	0.12	37.77
2.85	Lascelles, 2006	Mount Gibson - Australia	659	magnetite-silicate BIF. Drill holl: EHB03. Depth from:293.5, to: 298.5	0.04	66.17		8
2.85	Lascelles, 2006	Mount Gibson - Australia	862	cherty BIF	0.19	32.5
2.85	Lascelles, 2006	Mount Gibson - Australia	1401	cherty BIF	0.11	40.04
2.85	Lascelles, 2006	Mount Gibson - Australia	1343	cherty BIF	0.1	45.67		13
2.85	Lascelles, 2006	Mount Gibson - Australia	1402	cherty BIF	0.2	41.64		31
2.85	Lascelles, 2006	Mount Gibson - Australia	868	chert-free magnetite BIF. Drill holl: EHR30. Depth from:176, to: 181	0.1	78.86		13
2.85	Lascelles, 2006	Mount Gibson - Australia	867	chert-free magnetite BIF. Drill holl: EHR30. Depth from:170, to: 176	0.11	83.33		14
2.85	Lascelles, 2006	Mount Gibson - Australia	865	chert-free magnetite BIF. Drill holl: EHR30. Depth from:158.2, to: 164	0.12	84.78		17
2.85	Lascelles, 2006	Mount Gibson - Australia	532	chert-free magnetite BIF. Drill holl: EHR30. Depth from:158.2, to: 164	0.08	79.41		14
2.85	Lascelles, 2006	Mount Gibson - Australia	657	magnetite-silicate BIF. Drill holl: EHB03. Depth from:283.5, to: 288.5	0.06	63.05		9
2.85	Lascelles, 2006	Mount Gibson - Australia	1364	magnetite-carbonate BIF. Drill holl:EHR57. Depth from:261.7, to: 267.9	0.04	77.39		10
2.85	Lascelles, 2006	Mount Gibson - Australia	1240	cherty BIF. Drill holl: EHR45. Depth from:244.5, to: 250.1	0.08	60.42		9
2.85	Lascelles, 2006	Mount Gibson - Australia	635	cherty BIF. Drill holl: EHB03. Depth from:181.5, to: 186.5	0.06	48.64		8
2.85	Lascelles, 2006	Mount Gibson - Australia	978	cherty BIF. Drill holl: EHB03. Depth from:170.6, to: 173.65	0.1	64.89		16
2.85	Lascelles, 2006	Mount Gibson - Australia	1396	cherty BIF. Drill holl: EHR64. Depth from:173, to: 178	0.07	50.84		9
2.85	Lascelles, 2006	Mount Gibson - Australia	1360	magnetite-carbonate BIF. Drill holl:EHR57. Depth from:245.8, to: 250.4	0.07	63.57		9
2.85	Lascelles, 2006	Mount Gibson - Australia	870	cherty BIF. Drill holl: EHR30. Depth from:186.1, to: 190.77	0.13	58.14		13
2.85	Lascelles, 2006	Mount Gibson - Australia	1357	magnetite-carbonate BIF. Drill holl:EHR57. Depth from:232.1, to: 238	0.07	65.14		9
2.85	Lascelles, 2006	Mount Gibson - Australia	1427	magnetite-carbonate BIF	0.09	72.09		25
2.85	Lascelles, 2006	Mount Gibson - Australia	1410	cherty BIF. Drill holl: EHR64. Depth from:237.23, to: 242.4	0.13	43.49		13
2.85	Vishiti et al., 2022	Mbalam iron ore district, southeastern Cameroon	NG06				1.8
2.85	Vishiti et al., 2022	Mbalam iron ore district, southeastern Cameroon	NG01				2.3
2.8	Khan and Naqvi, 1996	Kushtagi Schist belt, Dharwar Craton, India	RHR1	Cherty Banded Iron Formation	0.04	80.88		9.53
2.8	Khan and Naqvi, 1996	Kushtagi Schist belt, Dharwar Craton, India	RHR38	Cherty Banded Iron Formation	0.04	38.05		8.07
2.8	Khan and Naqvi, 1996	Kushtagi Schist belt, Dharwar Craton, India	RHR16	Cherty Banded Iron Formation	0.03	50.06		4.83
2.8	Khan and Naqvi, 1996	Kushtagi Schist belt, Dharwar Craton, India	RHR11	Cherty Banded Iron Formation	0.03	45.99		6.79
2.8	Khan and Naqvi, 1996	Kushtagi Schist belt, Dharwar Craton, India	RHR3	Cherty Banded Iron Formation	0.04	68.78		6.68
2.8	Khan and Naqvi, 1996	Kushtagi Schist belt, Dharwar Craton, India	RHR50	Cherty Banded Iron Formation	0.01	75.24		20.19
2.8	Khan and Naqvi, 1996	Kushtagi Schist belt, Dharwar Craton, India	RH-20S	Shaley Banded Iron Formation	0.65	19.93		62.77
2.8	Khan and Naqvi, 1996	Kushtagi Schist belt, Dharwar Craton, India	RA-5S	Shaley Banded Iron Formation	0.1	89.99		20.62
2.8	Khan and Naqvi, 1996	Kushtagi Schist belt, Dharwar Craton, India	RHR.41	Cherty Banded Iron Formation		57.69		4.66
2.8	Khan and Naqvi, 1996	Kushtagi Schist belt, Dharwar Craton, India	RA-IBS	Shaley Banded Iron Formation	0.4	56.12		42.27
2.8	Khan and Naqvi, 1996	Kushtagi Schist belt, Dharwar Craton, India	RA-1AS	Shaley Banded Iron Formation	0.57	15.51		14.19
2.8	Khan and Naqvi, 1996	Kushtagi Schist belt, Dharwar Craton, India	RHR-75S	Shaley Banded Iron Formation	0.14	85.39		54.02
2.8	Khan and Naqvi, 1996	Kushtagi Schist belt, Dharwar Craton, India	RHR21	Cherty Banded Iron Formation		25.7		7.85
2.8	Khan and Naqvi, 1996	Kushtagi Schist belt, Dharwar Craton, India	RHR31	Cherty Banded Iron Formation	0.06	57.17		16.81
2.8	Khan and Naqvi, 1996	Kushtagi Schist belt, Dharwar Craton, India	RHR24	Cherty Banded Iron Formation		32.78		5.9
2.8	Resende and Jost, 1995	Aimbe Formation, Guarinos Group, Central Brazil	Magnetita F. Ferriferas (n=25)	Magnetita F. Ferriferas (n=25)	0.03	64.48		30
2.8	Resende and Jost, 1995	Aimbe Formation, Guarinos Group, Central Brazil	Hematita F. Hematita (n=15)	Hematita F. Hematita (n=15)	5.19	88.49
2.8	Resende and Jost, 1995	Aimbe Formation, Guarinos Group, Central Brazil	Hematita F. Magnetita (n=15)	Hematita F. Magnetita (n=15)	1.79	95.39
2.75	Justo et al., 2020	Carajas, Amazon Craton, Brazil	IF-G (068-17)_ago17	According to email with Mike the trace elemental data was divided by 1000
2.75	Justo et al., 2020	Carajas, Amazon Craton, Brazil	0138-FD01-484	According to email with Mike the trace elemental data was divided by 1000
2.75	Justo et al., 2020	Carajas, Amazon Craton, Brazil	N4E-1421-004	According to email with Mike the trace elemental data was divided by 1000
2.75	Justo et al., 2020	Carajas, Amazon Craton, Brazil	N4E-1421-008.1	According to email with Mike the trace elemental data was divided by 1000
2.75	Justo et al., 2020	Carajas, Amazon Craton, Brazil	N4E-1421-008.2	According to email with Mike the trace elemental data was divided by 1000			0.22
2.75	Justo et al., 2020	Carajas, Amazon Craton, Brazil	N4E-1421-008.3	According to email with Mike the trace elemental data was divided by 1000
2.75	Justo et al., 2020	Carajas, Amazon Craton, Brazil	N4E-1421-008.4	According to email with Mike the trace elemental data was divided by 1000
2.75	Justo et al., 2020	Carajas, Amazon Craton, Brazil	N4E-1421-008.5	According to email with Mike the trace elemental data was divided by 1000			0.13
2.75	Justo et al., 2020	Carajas, Amazon Craton, Brazil	GTCH-FD01-545.1	According to email with Mike the trace elemental data was divided by 1000
2.75	Justo et al., 2020	Carajas, Amazon Craton, Brazil	GTCH-FD01-555.1	According to email with Mike the trace elemental data was divided by 1000
2.75	Justo et al., 2020	Carajas, Amazon Craton, Brazil	S11D-191-009.1	According to email with Mike the trace elemental data was divided by 1000			21.86
2.75	Justo et al., 2020	Carajas, Amazon Craton, Brazil	S11D-191-009.2	According to email with Mike the trace elemental data was divided by 1000
2.75	Justo et al., 2020	Carajas, Amazon Craton, Brazil	S11D-191-009.3	According to email with Mike the trace elemental data was divided by 1000
2.75	Justo et al., 2020	Carajas, Amazon Craton, Brazil	0138-FD01-480	According to email with Mike the trace elemental data was divided by 1000
2.75	Justo et al., 2020	Carajas, Amazon Craton, Brazil	0138-FD01-482	According to email with Mike the trace elemental data was divided by 1000
2.75	Justo et al., 2020	Carajas, Amazon Craton, Brazil	0138-FD01-485	According to email with Mike the trace elemental data was divided by 1000
2.75	Justo et al., 2020	Carajas, Amazon Craton, Brazil	N5S-0755-005	According to email with Mike the trace elemental data was divided by 1000
2.75	Justo et al., 2020	Carajas, Amazon Craton, Brazil	FeR-3 (068-17)_ago17	According to email with Mike the trace elemental data was divided by 1000
2.75	Justo et al., 2020	Carajas, Amazon Craton, Brazil	IF-G (059-17)_jun17	According to email with Mike the trace elemental data was divided by 1000
2.75	Justo et al., 2020	Carajas, Amazon Craton, Brazil	IF-G (059-17)_ago17	According to email with Mike the trace elemental data was divided by 1000
2.75	Justo et al., 2020	Carajas, Amazon Craton, Brazil	IF-G (060-17)_ago17	According to email with Mike the trace elemental data was divided by 1000
2.75	Justo et al., 2020	Carajas, Amazon Craton, Brazil	N4E-1421-008.6	According to email with Mike the trace elemental data was divided by 1000			0.44
2.75	Justo et al., 2020	Carajas, Amazon Craton, Brazil	N4E-1421-009.1	According to email with Mike the trace elemental data was divided by 1000
2.75	Justo et al., 2020	Carajas, Amazon Craton, Brazil	N4E-1421-009.3	According to email with Mike the trace elemental data was divided by 1000
2.75	Justo et al., 2020	Carajas, Amazon Craton, Brazil	N4E-1421-009.5	According to email with Mike the trace elemental data was divided by 1000
2.75	Justo et al., 2020	Carajas, Amazon Craton, Brazil	N4E-1421-009.2	According to email with Mike the trace elemental data was divided by 1000			0.16
2.75	Justo et al., 2020	Carajas, Amazon Craton, Brazil	N4E-1421-009.4	According to email with Mike the trace elemental data was divided by 1000
2.75	Justo et al., 2020	Carajas, Amazon Craton, Brazil	N4WN-1103-005	According to email with Mike the trace elemental data was divided by 1000			5.44147
2.75	Justo et al., 2020	Carajas, Amazon Craton, Brazil	N4WN-1103-006	According to email with Mike the trace elemental data was divided by 1000
2.75	Justo et al., 2020	Carajas, Amazon Craton, Brazil	N5W-576-006	According to email with Mike the trace elemental data was divided by 1000
2.75	Justo et al., 2020	Carajas, Amazon Craton, Brazil	IF-G (044-17)_mai17	According to email with Mike the trace elemental data was divided by 1000
2.75	Justo et al., 2020	Carajas, Amazon Craton, Brazil	GTCH-FD01-545.2	According to email with Mike the trace elemental data was divided by 1000
2.75	Justo et al., 2020	Carajas, Amazon Craton, Brazil	ALFA-FD01-460	According to email with Mike the trace elemental data was divided by 1000
2.75	Arora et al., 1995	Bababudan Greenstone Belt, India	MG-24	magnetite silicate facies IF	0.01	36.84		10.53
2.75	Arora et al., 1995	Bababudan Greenstone Belt, India	MG-35	magnetite silicate facies IF	1	35.98		16.31
2.75	Arora et al., 1995	Bababudan Greenstone Belt, India	MG-26	magnetite silicate facies IF	0.01	37.04		12.3
2.75	Arora et al., 1995	Bababudan Greenstone Belt, India	MG-27	magnetite silicate facies IF	0.01	46.37		8.84
2.75	Arora et al., 1995	Bababudan Greenstone Belt, India	MG-28	magnetite silicate facies IF	0.44	2.45		40.49
2.75	Arora et al., 1995	Bababudan Greenstone Belt, India	MG-29	magnetite silicate facies IF	0.28	9.77		86.08
2.75	Arora et al., 1995	Bababudan Greenstone Belt, India	MG-30	magnetite silicate facies IF	1.01	16.75		385.5
2.75	Arora et al., 1995	Bababudan Greenstone Belt, India	MG-31	magnetite silicate facies IF	0.01	41.58		5.06
2.75	Arora et al., 1995	Bababudan Greenstone Belt, India	MG-32	magnetite silicate facies IF	0.01	47.39		6.45
2.75	Arora et al., 1995	Bababudan Greenstone Belt, India	MG-33	magnetite silicate facies IF	0.01	37.76		10.8
2.75	Arora et al., 1995	Bababudan Greenstone Belt, India	MG-34	magnetite silicate facies IF	0.01	49.7		19.52
2.75	Arora et al., 1995	Bababudan Greenstone Belt, India	MG-36	magnetite silicate facies IF	0.01	40.82		16.72
2.75	Arora et al., 1995	Bababudan Greenstone Belt, India	MG-22	magnetite silicate facies IF	0.03	6.22		784
2.75	Arora et al., 1995	Bababudan Greenstone Belt, India	MG-37	magnetite silicate facies IF	1.36	34.03		224.98
2.75	Arora et al., 1995	Bababudan Greenstone Belt, India	MG-38	magnetite silicate facies IF	0.01	45.26		11.72
2.75	Arora et al., 1995	Bababudan Greenstone Belt, India	MG-39	magnetite silicate facies IF	0.01	47.59		4.04
2.75	Arora et al., 1995	Bababudan Greenstone Belt, India	MG-40	magnetite silicate facies IF	0.01	48.59		4.36
2.75	Arora et al., 1995	Bababudan Greenstone Belt, India	MG-41	magnetite silicate facies IF	0.01	63.8		6.93
2.75	Arora et al., 1995	Bababudan Greenstone Belt, India	MG-42	magnetite silicate facies IF	0.01	41.33		7.66
2.75	Arora et al., 1995	Bababudan Greenstone Belt, India	MG-43	magnetite silicate facies IF	0.01	44.46		9.42
2.75	Arora et al., 1995	Bababudan Greenstone Belt, India	MG-44	magnetite silicate facies IF	0.01	50.95		7.78
2.75	Arora et al., 1995	Bababudan Greenstone Belt, India	MG-45	magnetite silicate facies IF	0.01	35.96		6.61
2.75	Arora et al., 1995	Bababudan Greenstone Belt, India	MG-25	magnetite silicate facies IF	0.01	42.37		9.49
2.75	Arora et al., 1995	Bababudan Greenstone Belt, India	MG-23	magnetite silicate facies IF	0.01	46.7		14.67
2.75	Arora et al., 1995	Bababudan Greenstone Belt, India	MG-10	magnetite silicate facies IF	0.01	51.68		7.49
2.75	Arora et al., 1995	Bababudan Greenstone Belt, India	MG-9	magnetite silicate facies IF	1.18	14.1		200.02
2.75	Arora et al., 1995	Bababudan Greenstone Belt, India	MG-1	magnetite silicate facies IF	0.01	42.31		5.57
2.75	Arora et al., 1995	Bababudan Greenstone Belt, India	MG-2	magnetite silicate facies IF	0.01	37.91		6.5
2.75	Arora et al., 1995	Bababudan Greenstone Belt, India	MG-3	magnetite silicate facies IF	0.01	40.46		8.05
2.75	Arora et al., 1995	Bababudan Greenstone Belt, India	MG-4	magnetite silicate facies IF	0.01	41.56		6.6
2.75	Arora et al., 1995	Bababudan Greenstone Belt, India	MG-5	magnetite silicate facies IF	0.01	44.94		11.81
2.75	Arora et al., 1995	Bababudan Greenstone Belt, India	MG-6	magnetite silicate facies IF	0.01	21.27		8.47
2.75	Arora et al., 1995	Bababudan Greenstone Belt, India	MG-7	magnetite silicate facies IF	0.01	29.64		5.3
2.75	Arora et al., 1995	Bababudan Greenstone Belt, India	MG-8	magnetite silicate facies IF	1.23	29.73		169.51
2.75	Arora et al., 1995	Bababudan Greenstone Belt, India	MG-17		0.01	52.57		8.21
2.75	Arora et al., 1995	Bababudan Greenstone Belt, India	MG-11	magnetite silicate facies IF	1.18	12.94		203.99
2.75	Arora et al., 1995	Bababudan Greenstone Belt, India	MG-12	magnetite silicate facies IF	0.01	45.16		5.36
2.75	Arora et al., 1995	Bababudan Greenstone Belt, India	MG-la	magnetite silicate facies IF	0.01	47.7		6.53
2.75	Arora et al., 1995	Bababudan Greenstone Belt, India	MG-i4	magnetite silicate facies IF	0.04	44.27		7.37
2.75	Arora et al., 1995	Bababudan Greenstone Belt, India	MG-is	magnetite silicate facies IF	0.01	45.18		6.07
2.75	Arora et al., 1995	Bababudan Greenstone Belt, India	MG-16	magnetite silicate facies IF	0.01	30		20.46
2.75	Arora et al., 1995	Bababudan Greenstone Belt, India	MG-18	magnetite silicate facies IF	0.01	48.31		6.06
2.75	Arora et al., 1995	Bababudan Greenstone Belt, India	MG-i9	magnetite silicate facies IF	0.01	35.62		7.1
2.75	Arora et al., 1995	Bababudan Greenstone Belt, India	MG-20	magnetite silicate facies IF	0.01	53.91		6.45
2.75	Arora et al., 1995	Bababudan Greenstone Belt, India	MG-21	magnetite silicate facies IF	0.44	20.99		106.66
2.74	Klein and Ladeira., 2000	Carajas - Brazil	3	from N4E deposit, bench 670N	0.016	56.6		0.62
2.74	Klein and Ladeira., 2000	Carajas - Brazil	4	from N4E deposit, upper bench 685	0.014	44.78		0.34
2.74	Klein and Ladeira., 2000	Carajas - Brazil	5	DDH no. F065, 263m	0.015	65.57		0.43
2.74	Klein and Ladeira., 2000	Carajas - Brazil	10	DDH no. N4F231, 26.8m	0.013	49.1		<0.15
2.74	Klein and Ladeira., 2000	Carajas - Brazil	2	from N4E deposit, bench 655N	0.03	72.27		0.16
2.74	Klein and Ladeira., 2000	Carajas - Brazil	9	DDH no. F080, 236m;	0.015	65.4		<0.21
2.74	Martins et al., 2022	Carajás Mineral Province, Braizil	F1051-157		<0.01	46.98		3
2.74	Martins et al., 2022	Carajás Mineral Province, Braizil	F1398-134		<0.01	46.25		3
2.74	Martins et al., 2022	Carajás Mineral Province, Braizil	F1398-059		0.02	54.24		12
2.74	Martins et al., 2022	Carajás Mineral Province, Braizil	F1398-067		<0.01	54.96		9
2.74	Martins et al., 2022	Carajás Mineral Province, Braizil	F1515-158		0.01	47.14		3
2.74	Martins et al., 2022	Carajás Mineral Province, Braizil	F1515-140		<0.01	51.21		1
2.74	Martins et al., 2022	Carajás Mineral Province, Braizil	F1398-071		<0.01	60.35		1
2.74	Martins et al., 2022	Carajás Mineral Province, Braizil	F1051-126		0.01	58.24		4
2.74	Martins et al., 2022	Carajás Mineral Province, Braizil	F1398-074		<0.01	61.68		5
2.74	Martins et al., 2022	Carajás Mineral Province, Braizil	F1398-080		<0.01	58.95		6
2.74	Martins et al., 2022	Carajás Mineral Province, Braizil	F1398-081		<0.01	52.74		2
2.74	Martins et al., 2022	Carajás Mineral Province, Braizil	F1515-159		<0.01	40.73		2
2.74	Martins et al., 2022	Carajás Mineral Province, Braizil	F1051-131		<0.01	54.45		4
2.74	Martins et al., 2022	Carajás Mineral Province, Braizil	F1398-083		<0.01	49.36		4
2.74	Martins et al., 2022	Carajás Mineral Province, Braizil	F1515-218		0.02	55.43		4
2.74	Martins et al., 2022	Carajás Mineral Province, Braizil	F1398-090		<0.01	54.97		3
2.74	Martins et al., 2022	Carajás Mineral Province, Braizil	F1398-094		0.01	48.5		5
2.74	Martins et al., 2022	Carajás Mineral Province, Braizil	F1051-144		<0.01	40.45		3
2.74	Martins et al., 2022	Carajás Mineral Province, Braizil	F1398-110		<0.01	41.95		2
2.74	Martins et al., 2022	Carajás Mineral Province, Braizil	F1515-243		<0.01	39.77		2
2.74	Martins et al., 2022	Carajás Mineral Province, Braizil	F1515-259		<0.01	46.67		<1
2.74	Martins et al., 2022	Carajás Mineral Province, Braizil	F1515-261		<0.01	36.36		1
2.74	Martins et al., 2022	Carajás Mineral Province, Braizil	F1398-126		<0.01	28.58		6
2.74	Martins et al., 2022	Carajás Mineral Province, Braizil	F1051-143		<0.01	50.98		4
2.74	Martins et al., 2022	Carajás Mineral Province, Braizil	F1051-125		0.07	64.22		11
2.74	Martins et al., 2022	Carajás Mineral Province, Braizil	F1398-058		0.01	56.34		1
2.74	Martins et al., 2022	Carajás Mineral Province, Braizil	F1051-123		0.01	48.08		7
2.74	Martins et al., 2022	Carajás Mineral Province, Braizil	F1398-003		<0.01	64.24		3
2.74	Martins et al., 2022	Carajás Mineral Province, Braizil	F1398-007		<0.01	60.76		8
2.74	Martins et al., 2022	Carajás Mineral Province, Braizil	F1398-011		<0.01	50.06		1
2.74	Martins et al., 2022	Carajás Mineral Province, Braizil	F1398-014		<0.01	59.69		2
2.74	Martins et al., 2022	Carajás Mineral Province, Braizil	F1398-018		<0.01	60.88		3
2.74	Martins et al., 2022	Carajás Mineral Province, Braizil	F1495-281		<0.01	58.64		1
2.74	Martins et al., 2022	Carajás Mineral Province, Braizil	F1398-025		<0.01	53.73		4
2.74	Martins et al., 2022	Carajás Mineral Province, Braizil	F1398-032		<0.01	57.12		1
2.74	Martins et al., 2022	Carajás Mineral Province, Braizil	F1515-087		<0.01	49.46		5
2.74	Martins et al., 2022	Carajás Mineral Province, Braizil	F1515-089		<0.01	38.98		2
2.74	Martins et al., 2022	Carajás Mineral Province, Braizil	F1398-036		<0.01	53.69		<1
2.74	Martins et al., 2022	Carajás Mineral Province, Braizil	F1398-040		<0.01	58.37		<1
2.74	Martins et al., 2022	Carajás Mineral Province, Braizil	F1398-043		<0.01	62.88		1
2.74	Martins et al., 2022	Carajás Mineral Province, Braizil	F1398-049		<0.01	50.61		9
2.74	Martins et al., 2022	Carajás Mineral Province, Braizil	F1515-102		<0.01	52.03		9
2.74	Martins et al., 2022	Carajás Mineral Province, Braizil	F1515-107		0.01	60.05		9
2.74	Martins et al., 2022	Carajás Mineral Province, Braizil	F1515-110		<0.01	59.02		7
2.74	Martins et al., 2022	Carajás Mineral Province, Braizil	F1515-121		<0.01	50.94		6
2.74	Martins et al., 2022	Carajás Mineral Province, Braizil	F1495-282		<0.01	57.47		3
2.74	Martins et al., 2022	Carajás Mineral Province, Braizil	F1398-052		<0.01	49.07		1
2.74	Martins et al., 2022	Carajás Mineral Province, Braizil	F1515-123		0.02	52.57		33
2.74	Martins et al., 2022	Carajás Mineral Province, Braizil	F1051-154		<0.01	47.42		3
2.71	Gourcerol et al., 2016	east BIF, eadowbank	AMB-126250		0.000678333		0.111	0.205
2.71	Gourcerol et al., 2016	west BIF, eadowbank	AMB-128331		0.079		0.054	11.09
2.71	Gourcerol et al., 2016	west BIF, eadowbank	AMB-126235		0.000396667		0.065	0.131
2.71	Gourcerol et al., 2016	central BIF, eadowbank	AMB-126224		0.00085		0.062	0.118
2.71	Gourcerol et al., 2016	central BIF, eadowbank	AMB-126223		0.226333		0.166	9.36
2.71	Gourcerol et al., 2016	central BIF, eadowbank	AMB-126222		0.000701667		0.107	0.324
2.71	Gourcerol et al., 2016	central BIF, eadowbank	AMB-126227		0.00116333		0.038	0.386
2.71	Gourcerol et al., 2016	central BIF, eadowbank	AMB-126230		0.000878333		0.171	0.445
2.71	Gourcerol et al., 2016	central BIF, eadowbank	AMB-126231		0.463333		0.125	188.9
2.71	Gourcerol et al., 2016	west BIF, eadowbank	AMB-128332		0.105		0.084	4.61
2.71	Gourcerol et al., 2016	central BIF, eadowbank	AMB-126226		0.000350167		0.078	0.049
2.71	Gourcerol et al., 2016	west BIF, eadowbank	AMB-128330		0.306667		0.736	27.2
2.71	Gourcerol et al., 2016	west BIF, eadowbank	AMB-128329		0.000318333		0.043	0.133
2.71	Gourcerol et al., 2016	west BIF, eadowbank	AMB-128328		0.000374833		0.025	0.162
2.71	Gourcerol et al., 2016	central BIF, eadowbank	AMB-126225		0.00451667		0.088	1.565
2.71	Gourcerol et al., 2016	west BIF, eadowbank	AMB-126234		0.00125833		0.06	0.465
2.71	Gourcerol et al., 2016	east BIF, eadowbank	AMB-126249		0.000228		29	0.085
2.71	Gourcerol et al., 2016	east BIF, eadowbank	AMB-126248		0.000805		0.081	0.188
2.71	Gourcerol et al., 2016	east BIF, eadowbank	AMB-126247		0.000838333		0.079	0.245
2.71	Gourcerol et al., 2016	east BIF, eadowbank	AMB-126246		0.00223333		0.134	1.047
2.71	Gourcerol et al., 2016	east BIF, eadowbank	AMB-126245		0.00204167		0.034	0.529
2.71	Gourcerol et al., 2016	east BIF, eadowbank	AMB-126243		0.00201667		0.46	1.77
2.71	Gourcerol et al., 2016	central BIF, eadowbank	AMB-126232		0.00598333		0.134	3.33
2.71	Gourcerol et al., 2016	east BIF, eadowbank	AMB-126242		0.000508333		0.138	0.185
2.71	Gourcerol et al., 2016	west BIF, eadowbank	AMB-126233		0.00125167		0.051	0.211
2.71	Gourcerol et al., 2016	east BIF, eadowbank	AMB-126241		0.00142833		0.124	0.601
2.7	Gourcerol et al., 2016	b-type BIF, Beardmore	BG005-C		0.0162167		0.239	2.341
2.7	Gourcerol et al., 2016	b-type BIF, Beardmore	BG015-J		0.00393333		0.422	1.735
2.7	Gourcerol et al., 2016	b-type BIF, Beardmore	BG003-J		0.00379		0.194	2.596
2.7	Gourcerol et al., 2016	b-type BIF, Beardmore	BG008B-J		0.178667		0.296	31.91
2.7	Gourcerol et al., 2016	b-type BIF, Beardmore	BG005-J		0.00687833		0.142	4.417
2.7	Gourcerol et al., 2016	b-type BIF, Beardmore	BG006B-C		0.00423333		0.27	1.36
2.7	Gourcerol et al., 2016	b-type BIF, Beardmore	BG006B-J		0.0985		0.215	21.69
2.7	Gourcerol et al., 2016	b-type BIF, Beardmore	BG012B-J		0.067		0.56	10.22
2.7	Gourcerol et al., 2016	b-type BIF, Beardmore	BG020-J		0.00418333		0.313	3.11
2.7	Gourcerol et al., 2016	a-type BIF, Beardmore	BG001-J		0.00167		0.778	3.705
2.7	Gourcerol et al., 2016	a-type BIF, Beardmore	BG010D-J		0.002795		0.279	1.842
2.7	Gourcerol et al., 2016	a-type BIF, Beardmore	BG010B-J		0.0117167		0.216	2.004
2.7	Gourcerol et al., 2016	a-type BIF, Beardmore	BG010A-J		0.00963833		0.129	3.562
2.7	Gourcerol et al., 2016	a-type BIF, Beardmore	BG009C-J		0.0329333		11.85	3.429
2.7	Gourcerol et al., 2016	a-type BIF, Beardmore	BG009B-J		0.00787833		0.318	4.332
2.7	Gourcerol et al., 2016	a-type BIF, Beardmore	BG002-J		0.00662833		0.089	3.507
2.7	Gourcerol et al., 2016	a-type BIF, Beardmore	BG002-C		0.00303		0.441	1.253
2.7	Gourcerol et al., 2016	a-type BIF, Beardmore	BG001-C		0.0019		0.232	1.48
2.7	Gourcerol et al., 2016	c-type BIF, Beardmore	BG022-J		0.0360667		0.68	32.08
2.7	Gourcerol et al., 2016	c-type BIF, Beardmore	BG004-C		0.0349167		0.44	3.64
2.7	Gourcerol et al., 2016	c-type BIF, Beardmore	BG004-J		0.0144167		0.495	4.95
2.7	Gourcerol et al., 2016	c-type BIF, Beardmore	BG014-J		0.0968333		0.154	41.62
2.7	Gourcerol et al., 2016	c-type BIF, Beardmore	BG016-C		0.00838333		0.418	9.12
2.7	Gourcerol et al., 2016	c-type BIF, Beardmore	BG016-J		0.0203833		0.531	6.52
2.7	Gourcerol et al., 2016	c-type BIF, Beardmore	BG017-J		0.0875		0.18	26.87
2.7	Gourcerol et al., 2016	c-type BIF, Beardmore	BG018-J		0.0676667		0.95	37.68
2.7	Gourcerol et al., 2016	c-type BIF, Beardmore	BG019-J		0.088		1	75.1
2.65	Gourcerol et al., 2016	discovery, Meliadine	MEL039		0.00411667		0.86	1.488
2.65	Gourcerol et al., 2016	discovery, Meliadine	MEL024		0.000771667		0.072	0.109
2.65	Gourcerol et al., 2016	F-Zone, Meliadine	MEL014		0.000888333		0.274	0.16
2.65	Gourcerol et al., 2016	F-Zone, Meliadine	MEL015		0.00109667		0.232	0.591
2.65	Gourcerol et al., 2016	F-Zone, Meliadine	MEL016		0.000831667		0.181	0.227
2.65	Gourcerol et al., 2016	F-Zone, Meliadine	MEL017		0.0007885		0.211	0.097
2.65	Gourcerol et al., 2016	F-Zone, Meliadine	MEL018		0.00109167		0.277	0.265
2.65	Gourcerol et al., 2016	F-Zone, Meliadine	MEL019		0.0007605		0.34	0.119
2.65	Gourcerol et al., 2016	F-Zone, Meliadine	MEL020		0.00112333		0.219	0.618
2.65	Gourcerol et al., 2016	F-Zone, Meliadine	MEL021		0.000963333		0.229	0.368
2.65	Gourcerol et al., 2016	discovery, Meliadine	MEL022		0.00333833		0.118	0.908
2.65	Gourcerol et al., 2016	discovery, Meliadine	MEL040		0.00136		0.355	0.216
2.65	Gourcerol et al., 2016	discovery, Meliadine	MEL025		0.00101667		0.161	0.129
2.65	Gourcerol et al., 2016	discovery, Meliadine	MEL038		0.000798333		0.46	0.19
2.65	Gourcerol et al., 2016	pump, Meliadine	MEL012		0.000443333		0.123	0.365
2.65	Gourcerol et al., 2016	discovery, Meliadine	MEL027		0.00326667		0.19	4.18
2.65	Gourcerol et al., 2016	discovery, Meliadine	MEL028		0.00069		0.35	0.094
2.65	Gourcerol et al., 2016	discovery, Meliadine	MEL029		0.00743333		0.062	4.64
2.65	Gourcerol et al., 2016	discovery, Meliadine	MEL031		0.0015		2.5	0.199
2.65	Gourcerol et al., 2016	discovery, Meliadine	MEL032		0.002605		0.445	1.01
2.65	Gourcerol et al., 2016	discovery, Meliadine	MEL033		0.00068		0.91	0.137
2.65	Gourcerol et al., 2016	discovery, Meliadine	MEL034		0.000926667		0.211	0.23
2.65	Gourcerol et al., 2016	discovery, Meliadine	MEL035		0.000618333		1.05	0.31
2.65	Gourcerol et al., 2016	discovery, Meliadine	MEL036		0.00075		0.266	0.247
2.65	Gourcerol et al., 2016	F-Zone, Meliadine	MEL013		0.000936667		0.253	0.327
2.65	Gourcerol et al., 2016	discovery, Meliadine	MEL023		0.000888333		0.167	0.074
2.65	Gourcerol et al., 2016	pump, Meliadine	MEL011		0.00058		0.095	0.285
2.65	Gourcerol et al., 2016	pump, Meliadine	MEL004		0.000486667		0.146	0.44
2.65	Gourcerol et al., 2016	pump, Meliadine	MEL010		0.000405		0.76	0.209
2.65	Gourcerol et al., 2016	pump, Meliadine	MEL002		0.000528333		0.165	0.333
2.65	Gourcerol et al., 2016	pump, Meliadine	MEL003		0.000795		0.143	0.299
2.65	Gourcerol et al., 2016	pump, Meliadine	MEL001		0.00115		0.085	0.394
2.65	Gourcerol et al., 2016	pump, Meliadine	MEL006		0.000506667		0.111	0.436
2.65	Gourcerol et al., 2016	pump, Meliadine	MEL007		0.000453333		0.192	0.223
2.65	Gourcerol et al., 2016	pump, Meliadine	MEL008		0.000671667		0.169	0.601
2.65	Gourcerol et al., 2016	pump, Meliadine	MEL009		0.000431667		0.169	0.189
2.7	Gourcerol et al., 2015	Far west BIF, Canada	AMB-126239				0.22	3.79
2.7	Gourcerol et al., 2015	Far west BIF, Canada	AMB-126238				0.22	0.32
2.7	Gourcerol et al., 2015	Grizzly BIF, Canada	AMB-128334				0.05	11.41
2.7	Gourcerol et al., 2015	Grizzly BIF, Canada	AMB-128335				0.09	0.79
2.7	Gourcerol et al., 2015	Far west BIF, Canada	AMB-126236				0.09	1.58
2.7	Dossing et al., 2009	Tati Greenston Belt Botswana - Tholo Pit	MUPD024-58C	OxideBIF/Si		6.93		0.01
2.7	Dossing et al., 2009	Tati Greenston Belt Botswana - Tholo Pit	MUPD024-58A	OxideBIF/Si		6.94		0.01
2.7	Dossing et al., 2009	Tati Greenston Belt Botswana - Matsiloje	MAT3C-D	BIF/Si		35.15		0.01
2.7	Dossing et al., 2009	Tati Greenston Belt Botswana - Matsiloje	MAT3C-F	BIF/Si		22.36		0.01
2.7	Dossing et al., 2009	Tati Greenston Belt Botswana - Matsiloje	MAT3C-J	BIF/Varv		48.26		0.03
2.7	Dossing et al., 2009	Tati Greenston Belt Botswana - Matsiloje	MAT3C-E	BIF/Varv		49.78		0.02
2.7	Dossing et al., 2009	Tati Greenston Belt Botswana - Signal Hill	SH41B	OxideBIF/Fe		69.33		0.07
2.7	Dossing et al., 2009	Tati Greenston Belt Botswana - Signal Hill	SH41F	OxideBIF/Fe		72.17		0.05
2.7	Dossing et al., 2009	Tati Greenston Belt Botswana - Signal Hill	SH41D	OxideBIF/Fe		57.07		0.04
2.7	Dossing et al., 2009	Tati Greenston Belt Botswana - Signal Hill	SH41G	OxideBIF/Si		31.8		0.06
2.7	Dossing et al., 2009	Tati Greenston Belt Botswana - Signal Hill	SH41C	OxideBIF/Si		44.1		0.06
2.7	Dossing et al., 2009	Tati Greenston Belt Botswana - Signal Hill	SH41E	OxideBIF/Si		31.59		0.05
2.7	Dossing et al., 2009	Tati Greenston Belt Botswana - Signal Hill	SH41A	OxideBIF/Varv		49.93		0.12
2.7	Dossing et al., 2009	Tati Greenston Belt Botswana - Tau Pit	Tau20F	OxideBIF/Fe		46.29		0.08
2.7	Dossing et al., 2009	Tati Greenston Belt Botswana - Tau Pit	Tau20C	OxideBIF/Fe		40.66		0.07
2.7	Dossing et al., 2009	Tati Greenston Belt Botswana - Tau Pit	Tau20E	OxideBIF/Fe		39.01		0.05
2.7	Dossing et al., 2009	Tati Greenston Belt Botswana - Tau Pit	Tau20B	OxideBIF/Si		10.92		0.01
2.7	Dossing et al., 2009	Tati Greenston Belt Botswana - Tau Pit	Tau20A	OxideBIF/Si		33.23		0.04
2.7	Dossing et al., 2009	Tati Greenston Belt Botswana - Tau Pit	Tau20G	OxideBIF/Si		29.49		0.05
2.7	Dossing et al., 2009	Tati Greenston Belt Botswana - Tau Pit	Tau20D	OxideBIF/Si		28.72		0.03
2.7	Dossing et al., 2009	Tati Greenston Belt Botswana - Tholo Pit	MUPD024-58B	OxideBIF/Fe		30.87		0.04
2.7	Dossing et al., 2009	Tati Greenston Belt Botswana - Matsiloje	MAT3C-A	BIF/Si		24.68		0.02
2.7	Dossing et al., 2009	Tati Greenston Belt Botswana - Matsiloje	MAT3C-H	BIF/Si		22.52		0.01
2.7	Dossing et al., 2009	Tati Greenston Belt Botswana - Tholo Pit	MUPD024-58D	OxideBIF/Fe		42.18		0.06
2.7	Dossing et al., 2009	Tati Greenston Belt Botswana - Jim's Luck	Jims8aA	BIF/Fe		59.13		0.07
2.7	Dossing et al., 2009	Tati Greenston Belt Botswana - Jim's Luck	Jims8aC	BIF/Fe		62.84		0.06
2.7	Dossing et al., 2009	Tati Greenston Belt Botswana - Jim's Luck	Jims8aB	BIF/Si		42.32		0.04
2.7	Dossing et al., 2009	Tati Greenston Belt Botswana - Jim's Luck	Jims8aD	BIF/Varv		55.84		0.04
2.7	Dossing et al., 2009	Tati Greenston Belt Botswana - Jim's Luck	Jims8aE	BIF/Varv		49.66		0.03
2.7	Dossing et al., 2009	Tati Greenston Belt Botswana - Matsiloje	MAT3C-B	BIF/Fe		43.91		0.02
2.7	Dossing et al., 2009	Tati Greenston Belt Botswana - Matsiloje	MAT3C-G	BIF/Fe		60.21		0.02
2.7	Dossing et al., 2009	Tati Greenston Belt Botswana - Matsiloje	MAT3C-C	BIF/Fe		57.64		0.02
2.68	Ndime et al., 2019	Nkout West iron deposit, Congo craton, southern Cameroon	WH4-10	Magnetite BIF	0.01	57.4	0.076	0.97
2.68	Ndime et al., 2019	Nkout West iron deposit, Congo craton, southern Cameroon	CH7-1	Magnetite BIF	0.01	54.5	0.04	0.93
2.68	Ndime et al., 2019	Nkout West iron deposit, Congo craton, southern Cameroon	WH4-8	Magnetite BIF	0.03	55.5	0.07	0.98
2.68	Ndime et al., 2019	Nkout West iron deposit, Congo craton, southern Cameroon	WH4-5	Magnetite BIF	0.03	50.4	0.129	1.08
2.68	Ndime et al., 2019	Nkout West iron deposit, Congo craton, southern Cameroon	WH4-2	Magnetite BIF	0.02	55.3	0.01	0.8
2.68	Ndime et al., 2019	Nkout West iron deposit, Congo craton, southern Cameroon	CH24-1	Magnetite BIF	0.06	52.1	0.017	1
2.68	Ndime et al., 2019	Nkout West iron deposit, Congo craton, southern Cameroon	CH7-2	Magnetite BIF	0.02	54.6	0.032	0.94
2.68	Ndime et al., 2019	Nkout West iron deposit, Congo craton, southern Cameroon	WH3-6	Garnet BIF	0.26	31.5	0.073	1.66
2.68	Ndime et al., 2019	Nkout West iron deposit, Congo craton, southern Cameroon	WH4-3	Garnet BIF	0.17	38.1	0.004	1.07
2.68	Ndime et al., 2019	Nkout West iron deposit, Congo craton, southern Cameroon	WH3-9	Garnet BIF	0.21	32.7	0.071	1.12
2.68	Ndime et al., 2019	Nkout West iron deposit, Congo craton, southern Cameroon	CH24-2	Magnetite BIF	0.01	55.1	0.033	0.99
2.68	Ndime et al., 2019	Nkout West iron deposit, Congo craton, southern Cameroon	CH7-6	Garnet BIF	0.35	20	0.01	1.55
2.68	Ndime et al., 2019	Nkout West iron deposit, Congo craton, southern Cameroon	CH24-3	Magnetite BIF	0.02	38.1	0.038	0.92
2.68	Ndime et al., 2019	Nkout West iron deposit, Congo craton, southern Cameroon	CH7-3	Garnet BIF	0.33	28.3	0.007	1.4
2.62	Haugaard et al., 2017	Slave craton NW Canada	10142-B	Goose Lake	0.072			22
2.62	Haugaard et al., 2017	Slave craton NW Canada	22A	Damoti Lake	0.06			18
2.62	Haugaard et al., 2017	Slave craton NW Canada	22C	Damoti Lake	0.081			22
2.62	Haugaard et al., 2017	Slave craton NW Canada	29B	Point Lake	0.043			15
2.62	Haugaard et al., 2017	Slave craton NW Canada	29C-1	Point Lake	0.042			20
2.62	Haugaard et al., 2017	Slave craton NW Canada	29D-1	Point Lake	0.045			13
2.62	Haugaard et al., 2017	Slave craton NW Canada	12140-A	Goose Lake
2.62	Haugaard et al., 2017	Slave craton NW Canada	12140-B	Goose Lake	0.096			30
2.62	Haugaard et al., 2017	Slave craton NW Canada	10142-A	Goose Lake	0.008
2.62	Haugaard et al., 2017	Slave craton NW Canada	10B142-B	Goose Lake	0.052			17
2.62	Haugaard et al., 2017	Slave craton NW Canada	10B142-A	Goose Lake				5
2.62	Haugaard et al., 2017	Slave craton NW Canada	24164	Goose Lake	0.049			15
2.62	Haugaard et al., 2017	Slave craton NW Canada	8C	Slemon Lake	0.098			39
2.62	Haugaard et al., 2017	Slave craton NW Canada	8B	Slemon Lake	0.191			19
2.62	Haugaard et al., 2017	Slave craton NW Canada	8A	Slemon Lake	0.124			33
2.6	Kurzweil et al. 2015		Mill-225		0.1	40.4714	0.4
2.6	Kurzweil et al. 2015		Mill-223.2		0.1	26.7714	0.9
2.6	Kurzweil et al. 2015		Mill-223		0.1	35.0714	0.4
2.551	Kurzweil et al. 2015		ABDP-335		0.1	29.2714	0.6
2.54	Kurzweil et al. 2015		ABDP-292		0.199833	28.4714	1.2
2.522	Kurzweil et al. 2015		ABDP-220		0	37.5714	0.4
2.521	Kurzweil et al. 2015		ABDP-215		0	76.2429	0.3
2.515	Kurzweil et al. 2015		ABDP-190		0	65.6429	0.5
2.513	Kurzweil et al. 2015		ABDP-180		0	30.0714	0.2
2.509	Kurzweil et al. 2015		ABDP-164		0.1	44.1571	1.4
2.494	Kurzweil et al. 2015		ABDP-103		0	53.3571	1.4
2.56	Peng et al., 2018	Qingyuan greenstone belt BIF, north margin of the NCC	XD-11	According to email with Mike the trace elemental data was divided by 1000	0.07			18.6
2.56	Peng et al., 2018	Qingyuan greenstone belt BIF, north margin of the NCC	PXD-3	According to email with Mike the trace elemental data was divided by 1000	0.74			89
2.56	Peng et al., 2018	Qingyuan greenstone belt BIF, north margin of the NCC	PXD-2	According to email with Mike the trace elemental data was divided by 1000	0.91			173
2.56	Peng et al., 2018	Qingyuan greenstone belt BIF, north margin of the NCC	PXD-1	According to email with Mike the trace elemental data was divided by 1000	0.67			104
2.56	Peng et al., 2018	Qingyuan greenstone belt BIF, north margin of the NCC	XD-13	According to email with Mike the trace elemental data was divided by 1000	0.03			16
2.56	Peng et al., 2018	Qingyuan greenstone belt BIF, north margin of the NCC	XD-12	According to email with Mike the trace elemental data was divided by 1000	0.07			5.76
2.56	Peng et al., 2018	Qingyuan greenstone belt BIF, north margin of the NCC	XD-3	According to email with Mike the trace elemental data was divided by 1000	0.02			8.38
2.56	Peng et al., 2018	Qingyuan greenstone belt BIF, north margin of the NCC	XD-10	According to email with Mike the trace elemental data was divided by 1000	0.06			14.9
2.56	Peng et al., 2018	Qingyuan greenstone belt BIF, north margin of the NCC	XD-9	According to email with Mike the trace elemental data was divided by 1000	0.06			15.9
2.56	Peng et al., 2018	Qingyuan greenstone belt BIF, north margin of the NCC	XLH-2	According to email with Mike the trace elemental data was divided by 1000	0.01			7.24
2.56	Peng et al., 2018	Qingyuan greenstone belt BIF, north margin of the NCC	XLH-3	According to email with Mike the trace elemental data was divided by 1000	0.01			6.7
2.56	Peng et al., 2018	Qingyuan greenstone belt BIF, north margin of the NCC	XLH-4	According to email with Mike the trace elemental data was divided by 1000	0.01			5.19
2.56	Peng et al., 2018	Qingyuan greenstone belt BIF, north margin of the NCC	XLH-5	According to email with Mike the trace elemental data was divided by 1000	0.01			5.29
2.56	Peng et al., 2018	Qingyuan greenstone belt BIF, north margin of the NCC	XLH-6	According to email with Mike the trace elemental data was divided by 1000	0.01			5.1
2.56	Peng et al., 2018	Qingyuan greenstone belt BIF, north margin of the NCC	XLH-7	According to email with Mike the trace elemental data was divided by 1000	0.1			34.5
2.56	Peng et al., 2018	Qingyuan greenstone belt BIF, north margin of the NCC	XLH-8	According to email with Mike the trace elemental data was divided by 1000	0.01			5.65
2.56	Peng et al., 2018	Qingyuan greenstone belt BIF, north margin of the NCC	XLH-9	According to email with Mike the trace elemental data was divided by 1000	0.01			3.49
2.56	Peng et al., 2018	Qingyuan greenstone belt BIF, north margin of the NCC	XLH-10	According to email with Mike the trace elemental data was divided by 1000	0.02			5.39
2.56	Peng et al., 2018	Qingyuan greenstone belt BIF, north margin of the NCC	TYG-1	According to email with Mike the trace elemental data was divided by 1000	0.01			5.82
2.56	Peng et al., 2018	Qingyuan greenstone belt BIF, north margin of the NCC	TYG-2	According to email with Mike the trace elemental data was divided by 1000	0.01			14.6
2.56	Peng et al., 2018	Qingyuan greenstone belt BIF, north margin of the NCC	XD-1	According to email with Mike the trace elemental data was divided by 1000	0.02			8.54
2.56	Peng et al., 2018	Qingyuan greenstone belt BIF, north margin of the NCC	XD-2	According to email with Mike the trace elemental data was divided by 1000	0.02			14.7
2.56	Peng et al., 2018	Qingyuan greenstone belt BIF, north margin of the NCC	XD-4	According to email with Mike the trace elemental data was divided by 1000	0.01			7.65
2.56	Peng et al., 2018	Qingyuan greenstone belt BIF, north margin of the NCC	XD-6	According to email with Mike the trace elemental data was divided by 1000	0.06			19.3
2.56	Peng et al., 2018	Qingyuan greenstone belt BIF, north margin of the NCC	XD-7	According to email with Mike the trace elemental data was divided by 1000	0.01			4.95
2.56	Peng et al., 2018	Qingyuan greenstone belt BIF, north margin of the NCC	XD-8	According to email with Mike the trace elemental data was divided by 1000	0.01			4.36
2.56	Peng et al., 2018	Qingyuan greenstone belt BIF, north margin of the NCC	XLH-1	According to email with Mike the trace elemental data was divided by 1000	0.01			6.78
2.529	Men et al., 2020	Northwest of the Wutai Complex, Trans-North China Orogen	EK-7-2	Ekou BIF, silicate facies	<0.01		0.64	1
2.529	Men et al., 2020	Northwest of the Wutai Complex, Trans-North China Orogen	EK-1	Ekou BIF, oxide facies	0.07		0.91	22
2.529	Men et al., 2020	Northwest of the Wutai Complex, Trans-North China Orogen	EK-10-1	Ekou BIF, oxide facies	<0.01		0.53	<1
2.529	Men et al., 2020	Northwest of the Wutai Complex, Trans-North China Orogen	EK-7-1	Ekou BIF, silicate facies	0.03		0.59	5
2.529	Men et al., 2020	Northwest of the Wutai Complex, Trans-North China Orogen	EK-5-3	Ekou BIF, silicate facies	0.05		0.58	62
2.529	Men et al., 2020	Northwest of the Wutai Complex, Trans-North China Orogen	EK-5-2	Ekou BIF, silicate facies	0.09		0.39	77
2.529	Men et al., 2020	Northwest of the Wutai Complex, Trans-North China Orogen	EK-2	Ekou BIF, silicate facies	0.02		0.94	7
2.529	Men et al., 2020	Northwest of the Wutai Complex, Trans-North China Orogen	EK-9-1	Ekou BIF, oxide facies	0.02		0.62	4
2.529	Men et al., 2020	Northwest of the Wutai Complex, Trans-North China Orogen	EK-9-2	Ekou BIF, oxide facies	0.01		0.69	2
2.529	Men et al., 2020	Northwest of the Wutai Complex, Trans-North China Orogen	EK-5-1	Ekou BIF, silicate facies	0.05		0.51	9
2.529	Men et al., 2020	Northwest of the Wutai Complex, Trans-North China Orogen	EK-11-3	Ekou BIF, oxide facies	0.03		0.78	10
2.529	Men et al., 2020	Northwest of the Wutai Complex, Trans-North China Orogen	EK-10-2	Ekou BIF, oxide facies	0.05		1.09	18
2.5	Tong et al., 2021	Dagushan BIF, China	D-5-3	Silicate facies	0.02		1.11	17.38
2.5	Tong et al., 2021	Dagushan BIF, China	D-4-3	Carbonate facies	0.01		1.77	28
2.5	Tong et al., 2021	Dagushan BIF, China	D-5-1	Silicate facies	0.01		0.88	2.76
2.5	Tong et al., 2021	Dagushan BIF, China	D-5-2	Silicate facies	0.01		1.32	6.56
2.5	Tong et al., 2021	Dagushan BIF, China	D-4-1	Carbonate facies	0.01		7.55	23
2.5	Tong et al., 2021	Dagushan BIF, China	D-5-4	Silicate facies	0.01		0.69	4.33
2.5	Tong et al., 2021	Dagushan BIF, China	D-5-5	Silicate facies	0.01		0.37	4.68
2.5	Tong et al., 2021	Dagushan BIF, China	D-5-6	Silicate facies	0.01		0.25	6
2.5	Tong et al., 2021	Dagushan BIF, China	D-5-7	Silicate facies	0.01		1.14	13
2.5	Tong et al., 2021	Dagushan BIF, China	D-5-8	Silicate facies	0.01		2.59	11
2.5	Tong et al., 2021	Dagushan BIF, China	D-5-9	Silicate facies	0.01		2.72	8
2.5	Tong et al., 2021	Dagushan BIF, China	D-5-10	Silicate facies	0.01		0.03	3
2.5	Tong et al., 2021	Dagushan BIF, China	D-1-1	Oxide facies	0.01		2.14	6.65
2.5	Tong et al., 2021	Dagushan BIF, China	D-4-2	Carbonate facies	0.01		2.61	24
2.5	Tong et al., 2021	Dagushan BIF, China	D-3-2	Carbonate facies	0.01		2.01	5.93
2.5	Tong et al., 2021	Dagushan BIF, China	D-3-5	Carbonate facies	0.01		0.08	11
2.5	Tong et al., 2021	Dagushan BIF, China	D-3-4	Carbonate facies	0.01		1.36	2.24
2.5	Tong et al., 2021	Dagushan BIF, China	D-3-3	Carbonate facies	0.03		0.99	4.92
2.5	Tong et al., 2021	Dagushan BIF, China	D-3-1	Carbonate facies	0.01		1.45	5.89
2.5	Tong et al., 2021	Dagushan BIF, China	D-1-3	Oxide facies	0.01		2.55	4.14
2.5	Tong et al., 2021	Dagushan BIF, China	D-1-2	Oxide facies	0.01		3.01	2.87
2.5	Tong et al., 2021	Dagushan BIF, China	D-1-4	Oxide facies	0.01		4.12	4
2.5	Tong et al., 2021	Dagushan BIF, China	D-2-6	Oxide facies	0.01		0.08	5
2.5	Tong et al., 2021	Dagushan BIF, China	D-2-5	Oxide facies	0.01		1.47	1
2.5	Tong et al., 2021	Dagushan BIF, China	D-2-4	Oxide facies	0.01		1.14	3
2.5	Tong et al., 2021	Dagushan BIF, China	D-2-3	Oxide facies	0.01		3.11	5
2.5	Tong et al., 2021	Dagushan BIF, China	D-2-2	Oxide facies	0.01		6.7	11
2.5	Tong et al., 2021	Dagushan BIF, China	D-2-1	Oxide facies	0.01		2.41	1
2.5	Pecoits et al., 2009	Dales Gorge member, Brockman Iron Formation, Hamersley Group, Australia	BIF-15	BIF microband	0.000573333		0.76	1.12
2.5	Pecoits et al., 2009	Dales Gorge member, Brockman Iron Formation, Hamersley Group, Australia	BIF-15	BIF microband	0.000641667		0.33	1.19
2.5	Pecoits et al., 2009	Dales Gorge member, Brockman Iron Formation, Hamersley Group, Australia	BIF-16	BIF microband	0		0.26	1.43
2.5	Pecoits et al., 2009	Dales Gorge member, Brockman Iron Formation, Hamersley Group, Australia	BIF-16	BIF microband	0		0.23	0.66
2.5	Pecoits et al., 2009	Dales Gorge member, Brockman Iron Formation, Hamersley Group, Australia	BIF-16	BIF microband	0		0.25	1.17
2.5	Pecoits et al., 2009	Dales Gorge member, Brockman Iron Formation, Hamersley Group, Australia	BIF-16	BIF microband	0.00131		0.28	0.94
2.5	Pecoits et al., 2009	Dales Gorge member, Brockman Iron Formation, Hamersley Group, Australia	BIF-16	BIF microband	0.00143667		0.33	0.92
2.5	Pecoits et al., 2009	Dales Gorge member, Brockman Iron Formation, Hamersley Group, Australia	BIF-15	BIF microband	0		0.14	1.03
2.5	Pecoits et al., 2009	Dales Gorge member, Brockman Iron Formation, Hamersley Group, Australia	BIF-15	BIF microband	0		0.23	1.52
2.5	Pecoits et al., 2009	Dales Gorge member, Brockman Iron Formation, Hamersley Group, Australia	BIF-15	BIF microband	0.000596667		0.34	1.2
2.5	Ernst and Bau, 2021	Mt. Ruker BIF, Antarctica	ANT3.1
2.5	Ernst and Bau, 2021	Mt. Ruker BIF, Antarctica	ANT2.1
2.5	Ernst and Bau, 2021	Mt. Ruker BIF, Antarctica	FT-1-1
2.5	Ernst and Bau, 2021	Mt. Ruker BIF, Antarctica	IF-G
2.5	Ernst and Bau, 2021	Mt. Ruker BIF, Antarctica	ANT5.2
2.5	Ernst and Bau, 2021	Mt. Ruker BIF, Antarctica	ANT4.3
2.5	Ernst and Bau, 2021	Mt. Ruker BIF, Antarctica	ANT4.2
2.5	Ernst and Bau, 2021	Mt. Ruker BIF, Antarctica	ANT4.1
2.5	Ernst and Bau, 2021	Mt. Ruker BIF, Antarctica	ANT3.2
2.5	Ernst and Bau, 2021	Mt. Ruker BIF, Antarctica	FeR-3
2.5	Ernst and Bau, 2021	Mt. Ruker BIF, Antarctica	ANT1.1
2.48	Alibert and McCulloch, 1993	Hamersley Basin, Australia	W35(0-15)BIF16CRPG	BIF
2.48	Alibert and McCulloch, 1993	Hamersley Basin, Australia	W13(107-127)BIF12 dup. CRPG	BIF
2.48	Alibert and McCulloch, 1993	Hamersley Basin, Australia	W13(107-127) BIF12 *RSES	BIF
2.48	Alibert and McCulloch, 1993	Hamersley Basin, Australia	ND85/79() BIF13*CRPG	BIF
2.48	Alibert and McCulloch, 1993	Hamersley Basin, Australia	W23(92-113)BIF15 RSES	BIF
2.48	Alibert and McCulloch, 1993	Hamersley Basin, Australia	W23(92-113)BIFCRPG	BIF
2.48	Alibert and McCulloch, 1993	Hamersley Basin, Australia	W33(32-55) BIF16 CRPG	BIF
2.48	Alibert and McCulloch, 1993	Hamersley Basin, Australia	W45(27-45)CRPG	BIF
2.48	Alibert and McCulloch, 1993	Hamersley Basin, Australia	W35(0-15)BIF16 *RSES	BIF
2.48	Alibert and McCulloch, 1993	Hamersley Basin, Australia	W41(39-113)Joffre CRPG	BIF
2.48	Alibert and McCulloch, 1993	Hamersley Basin, Australia	W43(27\-45)Joffre rich CRPG	BIF
2.48	Alibert and McCulloch, 1993	Hamersley Basin, Australia	WYL2 Boolgeeda	BIF	0.02	26.75
2.48	Alibert and McCulloch, 1993	Hamersley Basin, Australia	Mill9 (228.8m)	BIF	0.04	38.51	0.4
2.48	Alibert and McCulloch, 1993	Hamersley Basin, Australia	Paraburdoo BIF0	BIF
2.48	Alibert and McCulloch, 1993	Hamersley Basin, Australia	W13(107-127)BIF12 CRPG	BIF
2.48	Alibert and McCulloch, 1993	Hamersley Basin, Australia	W41(39-113)	BIF	0.06	30.14
2.48	Alibert and McCulloch, 1993	Hamersley Basin, Australia	Mill9 (226m) *CPRG	BIF
2.48	Alibert and McCulloch, 1993	Hamersley Basin, Australia	Mill9 (229m)*	BIF	0.02	27.85	0.8
2.48	Alibert and McCulloch, 1993	Hamersley Basin, Australia	DDH 186MM(69.5-70) ferrug. Chert	Ferruginous chert	0.02	0.59	0.3	<5
2.48	Alibert and McCulloch, 1993	Hamersley Basin, Australia	DDH186MM (78.7m) ferrug. Chert	Ferruginous chert	0.04	23.69	0.5	16
2.48	Alibert and McCulloch, 1993	Hamersley Basin, Australia	DDH 186 MM (131.2m) ferrug. Chert	Ferruginous chert	0.01	2.18	0.4	5
2.48	Alibert and McCulloch, 1993	Hamersley Basin, Australia	DDH 186MM (106m) ferrug. Chert	Ferruginous chert	0.08	7.41	0.5	14
2.48	Alibert and McCulloch, 1993	Hamersley Basin, Australia	MM384/86(139.7-140.03m) chert	chert fraction
2.48	Alibert and McCulloch, 1993	Hamersley Basin, Australia	YAM1 BIF2	BIF	0.02	19.28	0.01	5
2.48	Alibert and McCulloch, 1993	Hamersley Basin, Australia	Mill9 (226m) * RSES	BIF
2.48	Alibert and McCulloch, 1993	Hamersley Basin, Australia	W38(31-44)	BIF	0.01	14.91	0.9	11
2.48	Alibert and McCulloch, 1993	Hamersley Basin, Australia	MM 396/86 (140m)BIF	BIF	0.01	31.13	0.6	5
2.48	Alibert and McCulloch, 1993	Hamersley Basin, Australia	MM 396/86 (142.33-142.55m) BIF	BIF	0.01	38.07	0.4
2.48	Alibert and McCulloch, 1993	Hamersley Basin, Australia	Mill9 (225.8m)	BIF	0.02	25.25	0.6
2.48	Alibert and McCulloch, 1993	Hamersley Basin, Australia	Mill9 (226m) BIF	BIF	0.02	32.38	0.5
2.48	Alibert and McCulloch, 1993	Hamersley Basin, Australia	W11 (111-132) BIF12*	BIF	0.01	46.81
2.48	Alibert and McCulloch, 1993	Hamersley Basin, Australia	ND85/79(215.2-215.5m)BIF13	BIF	0.01	42.67
2.48	Alibert and McCulloch, 1993	Hamersley Basin, Australia	W33(80.5-87)BIF16	BIF	0.01	39.72
2.48	Alibert and McCulloch, 1993	Hamersley Basin, Australia	W45(27-45)	BIF	<0.01	16.63	0.6	11
2.48	Alibert and McCulloch, 1993	Hamersley Basin, Australia	W25(109-129)BIF15	BIF	<0.01	16.62	<0.1	<5
2.48	Alibert and McCulloch, 1993	Hamersley Basin, Australia	W2(0-16)BIF5	BIF	0.01	33.82
2.48	Alibert and McCulloch, 1993	Hamersley Basin, Australia	W43(44-56)	BIF	0.01	36.15
2.48	Alibert and McCulloch, 1993	Hamersley Basin, Australia	W13(107-127)BIF12	BIF	0.01	49.31
2.48	Alibert and McCulloch, 1993	Hamersley Basin, Australia	W13(107-127)BIF12	BIF	0.01	27.2
2.48	Alibert and McCulloch, 1993	Hamersley Basin, Australia	W35(0-15)BIF16	BIF	0.01	63.41
2.48	Alibert and McCulloch, 1993	Hamersley Basin, Australia	W23(92-113)BIF15	BIF	0.01	26.36
2.48	Alibert and McCulloch, 1993	Hamersley Basin, Australia	W33(116-131) BIF16*	BIF	0.01	28.76	0.4
2.47	Beukes and Klein, 1990	Kuruman - Riries Member	PS - 178.95 m	stilpnomelane-bearing zone	<0.04	9.27		<150
2.47	Beukes and Klein, 1990	Kuruman - Riries Member	BR - 175.94 m	stilpnomelane-bearing zone	<0.04	21.31		<150
2.47	Beukes and Klein, 1990	Kuruman - Riries Member	BR - 189.07 m	stilpnomelane-bearing zone	<0.04	4.92		<150
2.47	Beukes and Klein, 1990	Kuruman - Riries Member	L - 187.44 m	stilpnomelane-bearing zone	<0.04	9.02		<150
2.47	Beukes and Klein, 1990	Kuruman - Riries Member	R - 187.2 m	stilpnomelane-bearing zone	<0.04	7.25		<150
2.47	Beukes and Klein, 1990	Kuruman - Riries Member	PS - 178.4 m	stilpnomelane-bearing zone	<0.04	0.8		<150
2.47	Beukes and Klein, 1990	Kuruman - Riries Member	L - 189.6 m	stilpnomelane-bearing zone	<0.04	8.04		<150
2.47	Beukes and Klein, 1990	Kuruman - Riries Member	R - 193.87 m	stilpnomelane-bearing zone	<0.04	4.06		<150
2.47	Beukes and Klein, 1990	Kuruman - Riries Member	PL - 178.99 m	stilpnomelane-bearing zone	<0.04	16.48		<150
2.47	Beukes and Klein, 1990	Kuruman - Riries Member	C - 187.25 m	stilpnomelane-bearing zone	<0.04	6.04		<150
2.47	Beukes and Klein, 1990	Kuruman - Riries Member	PBR - 176.5 m	stilpnomelane-bearing zone	<0.04	7.28		<150
2.47	Beukes and Klein, 1990	Kuruman - Riries Member	R - 172.75 m		<0.04	17.8		<150
2.47	Beukes and Klein, 1990	Kuruman - Riries Member	PBR - 160.97 m		<0.04	10.89		<150
2.47	Beukes and Klein, 1990	Kuruman - Riries Member	R - 170.25 m		<0.04	29.4		<150
2.47	Beukes and Klein, 1990	Kuruman - Riries Member	BR - 173.2 m		<0.04	28.3		<150
2.47	Beukes and Klein, 1990	Kuruman - Riries Member	PL - 162.34 m		<0.04	16.42		<150
2.47	Beukes and Klein, 1990	Kuruman - Riries Member	R - 168.78 m		<0.04	24.53		<150
2.47	Beukes and Klein, 1990	Kuruman - Riries Member	BR - 173.16 m		<0.04	21.21		<150
2.47	Beukes and Klein, 1990	Kuruman - Riries Member	PS - 166.1 m		<0.04	15.08		<150
2.47	Beukes and Klein, 1990	Kuruman - Riries Member	PS - 169.24 m		<0.04	18.65		<150
2.47	Beukes and Klein, 1990	Kuruman - Ouplass Member	PL - 156.85 m		<0.04	25.06		<150
2.47	Beukes and Klein, 1990	Kuruman - Ouplass Member	BC - 158.3 m		<0.04	11.13		<150
2.47	Beukes and Klein, 1990	Kuruman - Ouplass Member	C - 158.35 m		<0.04	7.98		<150
2.47	Beukes and Klein, 1990	Kuruman - Ouplass Member	PS - 158.8 m		<0.04	5.04		<150
2.47	Beukes and Klein, 1990	Kuruman - Riries Member	L - 180.7 m	stilpnomelane-bearing zone	<0.04	15.45		<150
2.47	Beukes and Klein, 1990	Griquatown - Danielskuil Member	PS - 150.25 m		<0.04	16.87		<150
2.47	Beukes and Klein, 1990	Griquatown - Danielskuil Member	PBR - 140.8 m		<0.04	31.38		<150
2.47	Beukes and Klein, 1990	Griquatown - Danielskuil Member	PBR - 154.1 m		<0.04	17.14		<150
2.47	Beukes and Klein, 1990	Griquatown - Danielskuil Member	PBR - 137.31 m		<0.04	20.62		<150
2.47	Beukes and Klein, 1990	Griquatown - Danielskuil Member	R - 153.23 m		<0.04	13.26		<150
2.47	Beukes and Klein, 1990	Griquatown - Danielskuil Member	BR - 155.7 m		<0.04	17.42		<150
2.47	Beukes and Klein, 1990	Griquatown - Danielskuil Member	BR - 152.23 m		<0.04	13.79		<150
2.47	Beukes and Klein, 1990	Griquatown - Danielskuil Member	PS - 150.12 m		<0.04	11.7		<150
2.47	Beukes and Klein, 1990	Griquatown - Danielskuil Member	R - 142.83 m		<0.04	17.28		<150
2.47	Horstmann and Halbich, 1995	Griquatown BIF	average with n between 4-6	magnetite-chert	0.02	22.5		3
2.47	Horstmann and Halbich, 1995	Kuruman BIF	average with n between 18-21	magnetite-carbonate-chert	0.01	19.1		3
2.47	Horstmann and Halbich, 1995	Kuruman BIF	average with n between10-12	magnetite-chert	0.01	26.49		4
2.47	Horstmann and Halbich, 1995	Kuruman BIF	average with n between 21-26	riebekite-carbonate-chert	0.01	20.3		3
2.47	Horstmann and Halbich, 1995	Kuruman BIF	average with n = 19	stilpnomelane	0.06	11.95		10
2.47	Horstmann and Halbich, 1995	Griquatown BIF	average with n between13-16	riebekite-carbonate-chert	0.02	17.9		5
2.47	Horstmann and Halbich, 1995	Griquatown BIF	average with n between 5-6	stilpnomelane	0.02	13.19		4
2.47	Horstmann and Halbich, 1995	Griquatown BIF	average with n = 3	iron silicate - chert	0.01	12.53		2
2.47	Horstmann and Halbich, 1995	Griquatown BIF	average with n between 12-14	magnetite-carbonate-chert	0.01	13.87		3
2.47	Klein and Beukes, 1989	Kuruman BIF	DII - 226.10 m	oxide BIF	<0.04	24.83		<150
2.47	Klein and Beukes, 1989	Kuruman BIF	AD5 - 152.10 m	oxide BIF	<0.04	17.86		<150
2.47	Klein and Beukes, 1989	Kuruman BIF	AD5 - 161.90 m	siderite-rich BIF and chert	<0.04	1.79		<150
2.47	Klein and Beukes, 1989	Kuruman BIF	AD5 - 94.40 m	oxide BIF	<0.04	30.93		<150
2.47	Klein and Beukes, 1989	Kuruman BIF	AD5 - 121.30 m	siderite-rich BIF and chert	<0.04	1.97		<150
2.47	Klein and Beukes, 1989	Kuruman BIF	WB98 - 814.30 m	siderite-rich BIF and chert	<0.04	0.56		<150
2.47	Klein and Beukes, 1989	Kuruman BIF	WB98 - 866.00 m	siderite-rich BIF and chert	<0.04	1.3		<150
2.47	Klein and Beukes, 1989	Kuruman BIF	AD5 - 158.40 m	siderite-rich BIF and chert	<0.04	1.01		<150
2.47	Klein and Beukes, 1989	Kuruman BIF	AD5 - 92.50 m	oxide BIF	<0.04	15.38		<150
2.47	Klein and Beukes, 1989	Kuruman BIF	AD5 - 168.70 m	siderite-rich BIF and chert	<0.04	---		<150
2.47	Klein and Beukes, 1989	Kuruman BIF	DII - 238.80 m	oxide BIF	<0.04	24.3		<150
2.47	Klein and Beukes, 1989	Kuruman BIF	AD5 - 124.80 m	oxide BIF	<0.04	24.96		<150
2.47	Klein and Beukes, 1989	Kuruman BIF	WB98 - 791.20 m	oxide BIF	<0.04	24.17		<150
2.47	Klein and Beukes, 1989	Kuruman BIF	AD5 - 149.80 m	oxide BIF	<0.04	14.48		<150
2.47	Klein and Beukes, 1989	Kuruman BIF	AD5 - 136.50 m	oxide BIF	<0.04	28.52		<150
2.47	Klein and Beukes, 1989	Kuruman BIF	WB98 - 791.40 m	oxide BIF	<0.04	21.8		<150
2.47	Klein and Beukes, 1989	Kuruman BIF	AD5 - 163.20 m	siderite-rich BIF and chert	<0.04	1.08		<150
2.47	Klein and Beukes, 1989	Kuruman BIF	DII - 221.50 m	siderite-rich BIF and chert	<0.04	---		<150
2.47	Klein and Beukes, 1989	Kuruman BIF	DII - 237.00 m	siderite-rich BIF and chert	<0.04	1.56		<150
2.47	Klein and Beukes, 1989	Kuruman BIF	DII - 223.80 m	siderite-rich BIF and chert	<0.04	1		<150
2.47	Klein and Beukes, 1989	Kuruman BIF	DII - 213.80 m	siderite-rich BIF and chert	<0.04	0.67		<150
2.47	Klein and Beukes, 1989	Kuruman BIF	DII - 245.20 m	siderite-rich BIF and chert	<0.04	---		<150
2.47	Klein and Beukes, 1989	Kuruman BIF	WB98 - 896.10 m	siderite-rich BIF and chert	<0.04	0.13		<150
2.47	Klein and Beukes, 1989	Kuruman BIF	WB98 - 882.00 m	siderite-rich BIF and chert	<0.04	0.58		<150
2.47	Klein and Beukes, 1989	Kuruman BIF	AD5 - 167.70 m	siderite-rich BIF and chert	<0.04	1.18		<150
2.47	Klein and Beukes, 1989	Kuruman BIF	WB98 - 816.90 m	siderite-rich BIF and chert	<0.04	0.59		<150
2.47	Klein and Beukes, 1989	Kuruman BIF	DII - 236.70 m	siderite-rich BIF and chert	<0.04	2.94		<150
2.47	Klein and Beukes, 1989	Kuruman BIF	AD5 - 159.30 m	siderite-rich BIF and chert	<0.04	1.58		<150
2.47	Klein and Beukes, 1989	Kuruman BIF	AD5 - 161.95 m	siderite-rich BIF and chert	<0.04	3		<150
2.47	Schroder et al., 2006	Kuruman IF, S. Africa	GKP01-246.65		0.6			131
2.47	Schroder et al., 2006	Kuruman IF, S. Africa	GKP01-241.63		0.6			137
2.47	Schroder et al., 2006	Kuruman IF, S. Africa	GKP01-236.20		0.64			160
2.47	Schroder et al., 2006	Kuruman IF, S. Africa	GKP01-228.15*		0.56			101
2.47	Schroder et al., 2006	Kuruman IF, S. Africa	GKP01-226.55		0.62			106
2.47	Schroder et al., 2006	Kuruman IF, S. Africa	GKP01-204.55*		0.52			114
2.47	Schroder et al., 2006	Kuruman IF, S. Africa	GKF01-230.05		0.53			105
2.47	Schroder et al., 2006	Kuruman IF, S. Africa	GKF01-226.0*		0.62			87
2.47	Schroder et al., 2006	Kuruman IF, S. Africa	GKP01-250.1		0.4			107
2.47	Schroder et al., 2006	Kuruman IF, S. Africa	GKF01-221.65		0.31			78
2.47	Schroder et al., 2006	Kuruman IF, S. Africa	GKF01-209.8		0.2			44
2.47	Schroder et al., 2006	Kuruman IF, S. Africa	GKF01-207.90		0.16			56
2.47	Schroder et al., 2006	Kuruman IF, S. Africa	GKF01-203.60		0.14			57
2.47	Schroder et al., 2006	Kuruman IF, S. Africa	GKF01-199.0		0.26			40
2.47	Schroder et al., 2006	Kuruman IF, S. Africa	GKF01-194.85		0.02			12
2.47	Schroder et al., 2006	Kuruman IF, S. Africa	GKF01-190.42		0.17			26
2.47	Schroder et al., 2006	Kuruman IF, S. Africa	GKF01-188.48		0.08			33
2.46	Kurzweil et al. 2016		GEC 126.5				0.13
2.46	Kurzweil et al. 2016		GEC 164.5				0.62
2.46	Kurzweil et al. 2016		GEC 144.3				0.2367
2.46	Kurzweil et al. 2016		GEC 140				0.22
2.46	Kurzweil et al. 2016		GEC 135.5				0.15
2.46	Kurzweil et al. 2016		GEC 87.5				0.2867
2.46	Kurzweil et al. 2016		GEC 122.5				0.15
2.46	Kurzweil et al. 2016		GEC 120				0.09
2.46	Kurzweil et al. 2016		GEC 118				0.16
2.46	Kurzweil et al. 2016		GEC 181.1				0.07
2.46	Kurzweil et al. 2016		GEC 84				0.4533
2.46	Kurzweil et al. 2016		GEC 82.8				0.6167
2.46	Kurzweil et al. 2016		GEC 172.5				0.7567
2.46	Kurzweil et al. 2016		GEC 257				0.5267
2.46	Kurzweil et al. 2016		GEC 202.5				0.09
2.46	Kurzweil et al. 2016		GEC 209.4				0.17
2.46	Kurzweil et al. 2016		GEC 231.7				0.5
2.46	Kurzweil et al. 2016		GEC 259				0.165
2.46	Kurzweil et al. 2016		GEC 284.7				0.4033
2.46	Kurzweil et al. 2016		GTF 248.5				0.22
2.46	Kurzweil et al. 2016		GTF 251.5				0.52
2.46	Kurzweil et al. 2016		GTF 257.3				0.73
2.46	Kurzweil et al. 2016		GTF 263.4				0.39
2.46	Kurzweil et al. 2016		GTF 266.8				0.28
2.46	Kurzweil et al. 2016		GTF 269.2				0.2767
2.46	Kurzweil et al. 2016		GTF 278				0.9533
2.46	Kurzweil et al. 2016		GEC 82.2				0.25
2.46	Kurzweil et al. 2016		GTF 278.8				0.2833
2.46	Kurzweil et al. 2016		GEC 65.9				0.16
2.46	Kurzweil et al. 2016		GEC 53.2				0.2167
2.45	Warchola et al., 2018	Boolgeeda IF, Hamersley Basin, Western Australia	160.02-160.075	Boolgeeda IF	0.194			42
2.45	Warchola et al., 2018	Boolgeeda IF, Hamersley Basin, Western Australia	135.04-135.14	Boolgeeda IF	0.119			21
2.45	Warchola et al., 2018	Boolgeeda IF, Hamersley Basin, Western Australia	139.74-139.83	Boolgeeda IF	0.095			17
2.45	Warchola et al., 2018	Boolgeeda IF, Hamersley Basin, Western Australia	138.6-138.73	Boolgeeda IF	0.089			13
2.45	Warchola et al., 2018	Boolgeeda IF, Hamersley Basin, Western Australia	137.3-137.4	Boolgeeda IF	0.09			17
2.45	Warchola et al., 2018	Boolgeeda IF, Hamersley Basin, Western Australia	136.5	Boolgeeda IF	0.142			31
2.45	Warchola et al., 2018	Boolgeeda IF, Hamersley Basin, Western Australia	136.4-136.46	Boolgeeda IF	0.368			63
2.45	Warchola et al., 2018	Boolgeeda IF, Hamersley Basin, Western Australia	135.8	Boolgeeda IF	0.169			37
2.45	Warchola et al., 2018	Boolgeeda IF, Hamersley Basin, Western Australia	133.05-133.15	Boolgeeda IF	0.121			22
2.45	Warchola et al., 2018	Boolgeeda IF, Hamersley Basin, Western Australia	133.75-133.85	Boolgeeda IF	0.119			17
2.45	Warchola et al., 2018	Boolgeeda IF, Hamersley Basin, Western Australia	140.75	Boolgeeda IF	0.084			18
2.45	Warchola et al., 2018	Boolgeeda IF, Hamersley Basin, Western Australia	132.5-132.59	Boolgeeda IF	0.119			26
2.45	Warchola et al., 2018	Boolgeeda IF, Hamersley Basin, Western Australia	132.38-132.5	Boolgeeda IF	0.118			21
2.45	Warchola et al., 2018	Boolgeeda IF, Hamersley Basin, Western Australia	132.3-132.38	Boolgeeda IF	0.037			10
2.45	Warchola et al., 2018	Boolgeeda IF, Hamersley Basin, Western Australia	132.23	Boolgeeda IF	0.16			22
2.45	Warchola et al., 2018	Boolgeeda IF, Hamersley Basin, Western Australia	131.76-131.82	Boolgeeda IF	0.013
2.45	Warchola et al., 2018	Boolgeeda IF, Hamersley Basin, Western Australia	140.09	Boolgeeda IF	0.037			13
2.45	Warchola et al., 2018	Boolgeeda IF, Hamersley Basin, Western Australia	142.13-142.23	Boolgeeda IF	0.1			17
2.45	Warchola et al., 2018	Boolgeeda IF, Hamersley Basin, Western Australia	131.04-131.17	Boolgeeda IF	0.111			25
2.45	Warchola et al., 2018	Boolgeeda IF, Hamersley Basin, Western Australia	143.55-143.6	Boolgeeda IF	0.125			21
2.45	Warchola et al., 2018	Boolgeeda IF, Hamersley Basin, Western Australia	144.1	Boolgeeda IF	0.127			22
2.45	Warchola et al., 2018	Boolgeeda IF, Hamersley Basin, Western Australia	144.87	Boolgeeda IF	0.111			19
2.45	Warchola et al., 2018	Boolgeeda IF, Hamersley Basin, Western Australia	145.45	Boolgeeda IF	0.125			23
2.45	Warchola et al., 2018	Boolgeeda IF, Hamersley Basin, Western Australia	146	Boolgeeda IF	0.393			65
2.45	Warchola et al., 2018	Boolgeeda IF, Hamersley Basin, Western Australia	146.36	Boolgeeda IF	0.273			50
2.45	Warchola et al., 2018	Boolgeeda IF, Hamersley Basin, Western Australia	146.49-146.54	Boolgeeda IF	0.012			6
2.45	Warchola et al., 2018	Boolgeeda IF, Hamersley Basin, Western Australia	146.95-147.0	Boolgeeda IF	0.018			7
2.45	Warchola et al., 2018	Boolgeeda IF, Hamersley Basin, Western Australia	147.0-147.05	Boolgeeda IF	0.234			42
2.45	Warchola et al., 2018	Boolgeeda IF, Hamersley Basin, Western Australia	147.93-147.97	Boolgeeda IF	0.07			19
2.45	Warchola et al., 2018	Boolgeeda IF, Hamersley Basin, Western Australia	148.02	Boolgeeda IF	0.025			12
2.45	Warchola et al., 2018	Boolgeeda IF, Hamersley Basin, Western Australia	148.085	Boolgeeda IF	0.133			38
2.45	Warchola et al., 2018	Boolgeeda IF, Hamersley Basin, Western Australia	148.1	Boolgeeda IF	0.324			33
2.45	Warchola et al., 2018	Boolgeeda IF, Hamersley Basin, Western Australia	148.12	Boolgeeda IF	0.006
2.45	Warchola et al., 2018	Boolgeeda IF, Hamersley Basin, Western Australia	131.65-131.75	Boolgeeda IF	0.118			21
2.45	Warchola et al., 2018	Boolgeeda IF, Hamersley Basin, Western Australia	130.46-130.51	Boolgeeda IF	0.009
2.45	Warchola et al., 2018	Boolgeeda IF, Hamersley Basin, Western Australia	130.95-131.04	Boolgeeda IF	0.018
2.45	Warchola et al., 2018	Boolgeeda IF, Hamersley Basin, Western Australia	170.40-170.47	Boolgeeda IF	0.05			9
2.45	Warchola et al., 2018	Boolgeeda IF, Hamersley Basin, Western Australia	165.8-165.9	Boolgeeda IF	0.033
2.45	Warchola et al., 2018	Boolgeeda IF, Hamersley Basin, Western Australia	166.67-166.74	Boolgeeda IF	0.04			7
2.45	Warchola et al., 2018	Boolgeeda IF, Hamersley Basin, Western Australia	167.6-167.67	Boolgeeda IF	0.058			8
2.45	Warchola et al., 2018	Boolgeeda IF, Hamersley Basin, Western Australia	168.38-168.31	Boolgeeda IF	0.051			12
2.45	Warchola et al., 2018	Boolgeeda IF, Hamersley Basin, Western Australia	169.32-169.39	Boolgeeda IF	0.063			12
2.45	Warchola et al., 2018	Boolgeeda IF, Hamersley Basin, Western Australia	170.19-170.26	Boolgeeda IF	0.059			14
2.45	Warchola et al., 2018	Boolgeeda IF, Hamersley Basin, Western Australia	172.1-172.18 A	Boolgeeda IF	0.039			9
2.45	Warchola et al., 2018	Boolgeeda IF, Hamersley Basin, Western Australia	159.98-160.015	Boolgeeda IF	0.004
2.45	Warchola et al., 2018	Boolgeeda IF, Hamersley Basin, Western Australia	172.1-172.18 B	Boolgeeda IF	0.009			7
2.45	Warchola et al., 2018	Boolgeeda IF, Hamersley Basin, Western Australia	172.1-172.18 C	Boolgeeda IF	0.032			8
2.45	Warchola et al., 2018	Boolgeeda IF, Hamersley Basin, Western Australia	172.15-172.23	Boolgeeda IF	0.074			12
2.45	Warchola et al., 2018	Boolgeeda IF, Hamersley Basin, Western Australia	173.46-173.52	Boolgeeda IF	0.102			16
2.45	Warchola et al., 2018	Boolgeeda IF, Hamersley Basin, Western Australia	174.24-174.31	Boolgeeda IF	0.052			19
2.45	Warchola et al., 2018	Boolgeeda IF, Hamersley Basin, Western Australia	174.07-174.13	Boolgeeda IF	0.106			16
2.45	Warchola et al., 2018	Boolgeeda IF, Hamersley Basin, Western Australia	165.3-165.4	Boolgeeda IF	0.027
2.45	Warchola et al., 2018	Boolgeeda IF, Hamersley Basin, Western Australia	164.1-164.04	Boolgeeda IF	0.005
2.45	Warchola et al., 2018	Boolgeeda IF, Hamersley Basin, Western Australia	163.97-164.01	Boolgeeda IF	0.056			10
2.45	Warchola et al., 2018	Boolgeeda IF, Hamersley Basin, Western Australia	163.32-163.2	Boolgeeda IF	0.107			30
2.45	Warchola et al., 2018	Boolgeeda IF, Hamersley Basin, Western Australia	162.61-162.67	Boolgeeda IF	0.04			16
2.45	Warchola et al., 2018	Boolgeeda IF, Hamersley Basin, Western Australia	162.32-162.38	Boolgeeda IF	0.062			11
2.45	Warchola et al., 2018	Boolgeeda IF, Hamersley Basin, Western Australia	162.10-162.15	Boolgeeda IF	0.007			6
2.45	Warchola et al., 2018	Boolgeeda IF, Hamersley Basin, Western Australia	161.41-161.48	Boolgeeda IF	0.067			15
2.45	Warchola et al., 2018	Boolgeeda IF, Hamersley Basin, Western Australia	161.32-161.41	Boolgeeda IF	0.006
2.45	Warchola et al., 2018	Boolgeeda IF, Hamersley Basin, Western Australia	161.28-161.32	Boolgeeda IF	0.097			17
2.45	Warchola et al., 2018	Boolgeeda IF, Hamersley Basin, Western Australia	160.5-160.64	Boolgeeda IF	0.138			38
2.45	Warchola et al., 2018	Boolgeeda IF, Hamersley Basin, Western Australia	128.24-128.31	Boolgeeda IF	0.173			39
2.45	Warchola et al., 2018	Boolgeeda IF, Hamersley Basin, Western Australia	128.55-128.65	Boolgeeda IF	0.319			65
2.45	Warchola et al., 2018	Boolgeeda IF, Hamersley Basin, Western Australia	129.88-130.01	Boolgeeda IF	0.177			30
2.45	Warchola et al., 2018	Boolgeeda IF, Hamersley Basin, Western Australia	130.38	Boolgeeda IF	0.163			29
2.45	Warchola et al., 2018	Boolgeeda IF, Hamersley Basin, Western Australia	130.39	Boolgeeda IF	0.211			59
2.45	Warchola et al., 2018	Boolgeeda IF, Hamersley Basin, Western Australia	130.4	Boolgeeda IF	0.26			45
2.45	Warchola et al., 2018	Boolgeeda IF, Hamersley Basin, Western Australia	148.2-148.25	Boolgeeda IF	0.017			6
2.45	Warchola et al., 2018	Boolgeeda IF, Hamersley Basin, Western Australia	148.6	Boolgeeda IF	0.319			50
2.45	Warchola et al., 2018	Boolgeeda IF, Hamersley Basin, Western Australia	148.65	Boolgeeda IF	0.001
2.45	Warchola et al., 2018	Boolgeeda IF, Hamersley Basin, Western Australia	155.46-155.56	Boolgeeda IF	0.182			29
2.45	Warchola et al., 2018	Boolgeeda IF, Hamersley Basin, Western Australia	157.74	Boolgeeda IF	0.267			64
2.45	Warchola et al., 2018	Boolgeeda IF, Hamersley Basin, Western Australia	156.72-156.83	Boolgeeda IF	0.135			20
2.45	Warchola et al., 2018	Boolgeeda IF, Hamersley Basin, Western Australia	156.72-156.62	Boolgeeda IF	0.158			23
2.45	Warchola et al., 2018	Boolgeeda IF, Hamersley Basin, Western Australia	156.5	Boolgeeda IF	0.105			26
2.45	Warchola et al., 2018	Boolgeeda IF, Hamersley Basin, Western Australia	156.45	Boolgeeda IF	0.003			5
2.45	Warchola et al., 2018	Boolgeeda IF, Hamersley Basin, Western Australia	156.4	Boolgeeda IF	0.177			38
2.45	Warchola et al., 2018	Boolgeeda IF, Hamersley Basin, Western Australia	154.87-154.9	Boolgeeda IF	0.023			11
2.45	Warchola et al., 2018	Boolgeeda IF, Hamersley Basin, Western Australia	159.035-159.07	Boolgeeda IF	0.005
2.45	Warchola et al., 2018	Boolgeeda IF, Hamersley Basin, Western Australia	154.84-154.87	Boolgeeda IF	0.099			58
2.45	Warchola et al., 2018	Boolgeeda IF, Hamersley Basin, Western Australia	154.84-154.8	Boolgeeda IF	0.43			57
2.45	Warchola et al., 2018	Boolgeeda IF, Hamersley Basin, Western Australia	157.76	Boolgeeda IF	0.023			7
2.45	Warchola et al., 2018	Boolgeeda IF, Hamersley Basin, Western Australia	158.24-158.26	Boolgeeda IF	0.273			39
2.45	Warchola et al., 2018	Boolgeeda IF, Hamersley Basin, Western Australia	149.31-149.36	Boolgeeda IF	0.033			7
2.45	Warchola et al., 2018	Boolgeeda IF, Hamersley Basin, Western Australia	159.5A	Boolgeeda IF	0.013			7
2.45	Warchola et al., 2018	Boolgeeda IF, Hamersley Basin, Western Australia	159.965-159.98	Boolgeeda IF	0.032			20
2.45	Warchola et al., 2018	Boolgeeda IF, Hamersley Basin, Western Australia	159.95-159.93	Boolgeeda IF	0.199			34
2.45	Warchola et al., 2018	Boolgeeda IF, Hamersley Basin, Western Australia	159.8	Boolgeeda IF	0.074			10
2.45	Warchola et al., 2018	Boolgeeda IF, Hamersley Basin, Western Australia	159.735-159.76	Boolgeeda IF	0.064			15
2.45	Warchola et al., 2018	Boolgeeda IF, Hamersley Basin, Western Australia	159.71-159.735	Boolgeeda IF	0.01
2.45	Warchola et al., 2018	Boolgeeda IF, Hamersley Basin, Western Australia	159.63B	Boolgeeda IF	0.169			49
2.45	Warchola et al., 2018	Boolgeeda IF, Hamersley Basin, Western Australia	159.3	Boolgeeda IF	0.207			30
2.45	Warchola et al., 2018	Boolgeeda IF, Hamersley Basin, Western Australia	158.26-158.29	Boolgeeda IF	0.032			17
2.45	Warchola et al., 2018	Boolgeeda IF, Hamersley Basin, Western Australia	159.22	Boolgeeda IF	0.01			6
2.45	Warchola et al., 2018	Boolgeeda IF, Hamersley Basin, Western Australia	159.13-159.19	Boolgeeda IF	0.099			24
2.45	Warchola et al., 2018	Boolgeeda IF, Hamersley Basin, Western Australia	159-159.035	Boolgeeda IF	0.031			17
2.45	Warchola et al., 2018	Boolgeeda IF, Hamersley Basin, Western Australia	158.96-159	Boolgeeda IF	0.2			23
2.45	Warchola et al., 2018	Boolgeeda IF, Hamersley Basin, Western Australia	158.6	Boolgeeda IF	0.476			63
2.45	Warchola et al., 2018	Boolgeeda IF, Hamersley Basin, Western Australia	158.58	Boolgeeda IF	0.009			8
2.45	Warchola et al., 2018	Boolgeeda IF, Hamersley Basin, Western Australia	153.1-153.14	Boolgeeda IF	0.95			206
2.45	Warchola et al., 2018	Boolgeeda IF, Hamersley Basin, Western Australia	153.87-153.945	Boolgeeda IF	0.121			23
2.45	Warchola et al., 2018	Boolgeeda IF, Hamersley Basin, Western Australia	153.78-153.84	Boolgeeda IF	0.409			51
2.45	Warchola et al., 2018	Boolgeeda IF, Hamersley Basin, Western Australia	152.53-152.59	Boolgeeda IF	0.497			92
2.45	Warchola et al., 2018	Boolgeeda IF, Hamersley Basin, Western Australia	152.2-152.28	Boolgeeda IF	0.519			108
2.45	Warchola et al., 2018	Boolgeeda IF, Hamersley Basin, Western Australia	151.83-151.91	Boolgeeda IF	0.56			105
2.45	Warchola et al., 2018	Boolgeeda IF, Hamersley Basin, Western Australia	151.33-151.38	Boolgeeda IF	0.112			17
2.45	Warchola et al., 2018	Boolgeeda IF, Hamersley Basin, Western Australia	150.64-150.72	Boolgeeda IF	0.178			25
2.45	Warchola et al., 2018	Boolgeeda IF, Hamersley Basin, Western Australia	150.58-150.64	Boolgeeda IF	0.103			18
2.45	Warchola et al., 2018	Boolgeeda IF, Hamersley Basin, Western Australia	149.36-149.4	Boolgeeda IF	0.143			21
2.45	Warchola et al., 2018	Boolgeeda IF, Hamersley Basin, Western Australia	160.075-160.12	Boolgeeda IF	0.006			8
2.45	Haugaard et al., 2016	Joffre member, Brockman Iron Formation, Hamersley Group, Australia	D098-30B		0.00265333		0.09	3.31
2.45	Haugaard et al., 2016	Joffre member, Brockman Iron Formation, Hamersley Group, Australia	D098-30A		0.00490667		0.12	5.16
2.45	Haugaard et al., 2016	Joffre member, Brockman Iron Formation, Hamersley Group, Australia	D098-29B		0.00157333		0.04	3.03
2.45	Haugaard et al., 2016	Joffre member, Brockman Iron Formation, Hamersley Group, Australia	D098-29A		0.00370667		0.1	4.84
2.45	Haugaard et al., 2016	Joffre member, Brockman Iron Formation, Hamersley Group, Australia	D098-28		0.116267		0.73	32.3
2.45	Haugaard et al., 2016	Joffre member, Brockman Iron Formation, Hamersley Group, Australia	D098-26A		0.0016		0.06	1.67
2.45	Haugaard et al., 2016	Joffre member, Brockman Iron Formation, Hamersley Group, Australia	D098-25B		0.0213333		0.09	6.84
2.45	Haugaard et al., 2016	Joffre member, Brockman Iron Formation, Hamersley Group, Australia	D098-5A		0.112267		0.85	17.7
2.45	Haugaard et al., 2016	Joffre member, Brockman Iron Formation, Hamersley Group, Australia	D098-4		0.00748		0.4	3.75
2.45	Haugaard et al., 2016	Joffre member, Brockman Iron Formation, Hamersley Group, Australia	D098-3B		0.00948		0.13	5.74
2.45	Haugaard et al., 2016	Joffre member, Brockman Iron Formation, Hamersley Group, Australia	D098-1		0.0150667		0.16	5.57
2.45	Haugaard et al., 2016	Joffre member, Brockman Iron Formation, Hamersley Group, Australia	D098-25A		0.0173333		0.15	6.64
2.45	Haugaard et al., 2016	Joffre member, Brockman Iron Formation, Hamersley Group, Australia	D098-6		0.0448		0.4	6.53
2.45	Haugaard et al., 2016	Joffre member, Brockman Iron Formation, Hamersley Group, Australia	D098-8		0.00852		0.09	3.42
2.45	Haugaard et al., 2016	Joffre member, Brockman Iron Formation, Hamersley Group, Australia	D098-19A		0.0149333		0.12	5.08
2.45	Haugaard et al., 2016	Joffre member, Brockman Iron Formation, Hamersley Group, Australia	D098-24B		0.0132533		0.2	9.03
2.45	Haugaard et al., 2016	Joffre member, Brockman Iron Formation, Hamersley Group, Australia	D098-22		0.0316		0.16	9.5
2.45	Haugaard et al., 2016	Joffre member, Brockman Iron Formation, Hamersley Group, Australia	D098-21B		0.0136		0.04	6.25
2.45	Haugaard et al., 2016	Joffre member, Brockman Iron Formation, Hamersley Group, Australia	D098-21A		0.0178667		0.06	6.24
2.45	Haugaard et al., 2016	Joffre member, Brockman Iron Formation, Hamersley Group, Australia	D098-20B		0.003		0.04	2.58
2.45	Haugaard et al., 2016	Joffre member, Brockman Iron Formation, Hamersley Group, Australia	D098-20A		0.0210667		0.1	5.79
2.45	Haugaard et al., 2016	Joffre member, Brockman Iron Formation, Hamersley Group, Australia	D098-18		0.0162667		0.16	4.93
2.45	Haugaard et al., 2016	Joffre member, Brockman Iron Formation, Hamersley Group, Australia	D098-16		0.0158667		0.13	5
2.45	Haugaard et al., 2016	Joffre member, Brockman Iron Formation, Hamersley Group, Australia	D098-15B		0.0181333		0.15	5.98
2.45	Haugaard et al., 2016	Joffre member, Brockman Iron Formation, Hamersley Group, Australia	D098-14B		0.00741333		0.03	3.71
2.45	Haugaard et al., 2016	Joffre member, Brockman Iron Formation, Hamersley Group, Australia	D098-13B		0.0184		0.05	5.39
2.45	Haugaard et al., 2016	Joffre member, Brockman Iron Formation, Hamersley Group, Australia	D098-12		0.00472		0.06	4.13
2.45	Haugaard et al., 2016	Joffre member, Brockman Iron Formation, Hamersley Group, Australia	D098-10B		0.0148		0.1	6.49
2.45	Haugaard et al., 2016	Joffre member, Brockman Iron Formation, Hamersley Group, Australia	D098-10A		0.00913333		0.05	5.7
2.45	Haugaard et al., 2016	Joffre member, Brockman Iron Formation, Hamersley Group, Australia	D098-9A		0.0178667		0.14	7.03
2.43	Spier et al., 2007	Quadrilatero Ferrifero, minas gerais - Brazil	P55 61	Itabirite Dolomite	<0.01	42.84	<2.0	13
2.43	Spier et al., 2007	Quadrilatero Ferrifero, minas gerais - Brazil	P3 122	Itabirite Mixed	<0.01	31.88	<2.0	<5.0
2.43	Spier et al., 2007	Quadrilatero Ferrifero, minas gerais - Brazil	M10A	iron-rich band of dolomitic itabirite (BIF)	0.02	65.04	<2.0	13
2.43	Spier et al., 2007	Quadrilatero Ferrifero, minas gerais - Brazil	P3 69	Itabirite (BIF) Quartz	<0.01	68.58	<2.0	<5.0
2.43	Spier et al., 2007	Quadrilatero Ferrifero, minas gerais - Brazil	P54 124	Itabirite (BIF) Quartz	<0.01	47.74	<2.0	11
2.43	Spier et al., 2007	Quadrilatero Ferrifero, minas gerais - Brazil	P54 80	Itabirite (BIF) Quartz	<0.01	76.75	<2.0	22
2.43	Spier et al., 2007	Quadrilatero Ferrifero, minas gerais - Brazil	P54 85	Itabirite (BIF) Quartz	<0.01	58.92	<2.0	52
2.43	Spier et al., 2007	Quadrilatero Ferrifero, minas gerais - Brazil	M96	Itabirite (BIF) Dolomite	0.04	59.05	<1.0	84.3
2.43	Spier et al., 2007	Quadrilatero Ferrifero, minas gerais - Brazil	M8	Itabirite (BIF) Dolomite	0.01	42.14	<2.0	36.4
2.43	Spier et al., 2007	Quadrilatero Ferrifero, minas gerais - Brazil	M4	Itabirite (BIF) Dolomite	0.04	45.3	<2.0	23.5
2.43	Spier et al., 2007	Quadrilatero Ferrifero, minas gerais - Brazil	M9	Itabirite (BIF) Dolomite	0.02	52.43	<2.0	5
2.43	Spier et al., 2007	Quadrilatero Ferrifero, minas gerais - Brazil	M11	Itabirite (BIF) Dolomite	0.01	67.61	<2.0	20
2.43	Spier et al., 2007	Quadrilatero Ferrifero, minas gerais - Brazil	M5	Itabirite (BIF) Dolomite	0.01	39.65	<2.0	14.3
2.43	Spier et al., 2007	Quadrilatero Ferrifero, minas gerais - Brazil	M7	Itabirite (BIF) Dolomite	0.01	45.86	<2.0	11.9
2.43	Spier et al., 2007	Quadrilatero Ferrifero, minas gerais - Brazil	P55 27	Itabirite (BIF) Dolomite	0.01	44.36	53.7	38
2.43	Spier et al., 2007	Quadrilatero Ferrifero, minas gerais - Brazil	M5A	iron-rich band of dolomitic itabirite (BIF)	0.02	83.43	<2.0	14
2.43	Spier et al., 2007	Quadrilatero Ferrifero, minas gerais - Brazil	M7A	iron-rich band of dolomitic itabirite (BIF)	0.02	82.38	3.9	29
2.43	Spier et al., 2007	Quadrilatero Ferrifero, minas gerais - Brazil	M8A	iron-rich band of dolomitic itabirite (BIF)	0.01	69.75	<2.0	121
2.43	Spier et al., 2007	Quadrilatero Ferrifero, minas gerais - Brazil	M11A	iron-rich band of dolomitic itabirite (BIF)	0.01	81.92	<2.0	13
2.43	Spier et al., 2007	Quadrilatero Ferrifero, minas gerais - Brazil	P3 18	Itabirite (BIF) Quartz	<0.01	37.18	<2.0	7.2
2.43	Spier et al., 2007	Quadrilatero Ferrifero, minas gerais - Brazil	P3 36	Itabirite (BIF) Quartz	0.03	54.27	<2.0	42.8
2.43	Spier et al., 2007	Quadrilatero Ferrifero, minas gerais - Brazil	M10	Itabirite (BIF) Dolomite	0.01	54.03	<2.0	9.6
2.43	Spier et al., 2007	Quadrilatero Ferrifero, minas gerais - Brazil	M6	Itabirite (BIF) Dolomite	0.06	44.62	<2.0	25.8
2.43	Spier et al., 2007	Quadrilatero Ferrifero, minas gerais - Brazil	P54 120	Itabirite (BIF) Quartz	<0.01	40.43	<2.0	18
2.43	Spier et al., 2007	Quadrilatero Ferrifero, minas gerais - Brazil	M6A	iron-rich band of dolomitic itabirite (BIF)	0.02	84.77	<2.0	28
2.43	Spier et al., 2007	Quadrilatero Ferrifero, minas gerais - Brazil	P3 50	Itabirite (BIF) Quartz	<0.01	68.44	4.7	21
2.43	Spier et al., 2007	Quadrilatero Ferrifero, minas gerais - Brazil	P3 23	Itabirite (BIF) Quartz	0.01	49.1	<2.0	27
2.43	Spier et al., 2007	Quadrilatero Ferrifero, minas gerais - Brazil	P3 83	Itabirite (BIF) Quartz	0.03	31.99	<2.0	6.5
2.43	Spier et al., 2007	Quadrilatero Ferrifero, minas gerais - Brazil	P3 103	Itabirite (BIF) Quartz	0.01	37.08	<2.0	<5.0
2.4	Tamehe et al., 2021	Gouap BIF, Nyong Group, Ntem Complex, Cameroon	GBW3-4	Amphibole–pyrite BIF				11
2.4	Tamehe et al., 2021	Gouap BIF, Nyong Group, Ntem Complex, Cameroon	GB10-2	Amphibole–pyrite BIF				41
2.4	Tamehe et al., 2021	Gouap BIF, Nyong Group, Ntem Complex, Cameroon	GB10-1	Amphibole–pyrite BIF				39
2.4	Tamehe et al., 2021	Gouap BIF, Nyong Group, Ntem Complex, Cameroon	GB4-1	Amphibole BIF				6
2.4	Tamehe et al., 2021	Gouap BIF, Nyong Group, Ntem Complex, Cameroon	GB6	Amphibole–pyrite BIF				23
2.4	Tamehe et al., 2021	Gouap BIF, Nyong Group, Ntem Complex, Cameroon	GBW3-5	Amphibole–pyrite BIF				33
2.4	Tamehe et al., 2021	Gouap BIF, Nyong Group, Ntem Complex, Cameroon	GBW3-3	Amphibole–pyrite BIF				13
2.4	Tamehe et al., 2021	Gouap BIF, Nyong Group, Ntem Complex, Cameroon	GBW3-2	Amphibole–pyrite BIF				59
2.4	Tamehe et al., 2021	Gouap BIF, Nyong Group, Ntem Complex, Cameroon	GBW3-1	Amphibole–pyrite BIF				80
2.4	Tamehe et al., 2021	Gouap BIF, Nyong Group, Ntem Complex, Cameroon	GB9	Amphibole BIF				2
2.4	Tamehe et al., 2021	Gouap BIF, Nyong Group, Ntem Complex, Cameroon	GB11-2	Amphibole BIF				18
2.4	Tamehe et al., 2021	Gouap BIF, Nyong Group, Ntem Complex, Cameroon	GB11-1	Amphibole BIF				7
2.4	Tamehe et al., 2021	Gouap BIF, Nyong Group, Ntem Complex, Cameroon	GB4-5	Amphibole BIF
2.4	Tamehe et al., 2021	Gouap BIF, Nyong Group, Ntem Complex, Cameroon	GB4-4	Amphibole BIF
2.4	Tamehe et al., 2021	Gouap BIF, Nyong Group, Ntem Complex, Cameroon	GB4-3	Amphibole BIF				15
2.4	Tamehe et al., 2021	Gouap BIF, Nyong Group, Ntem Complex, Cameroon	GB4-2	Amphibole BIF
2.39	Breitkopf, 1988	Kursk Magnetic Anomaly	6	Iron Formation	0.21			31
2.32	H.C. Dorland Thesis 1999	Timeball Hill	OTVL/14		0.26	51.29		355
2.32	H.C. Dorland Thesis 1999	Timeball Hill	TBH/MCN3		0.13	61.47		273
2.32	H.C. Dorland Thesis 1999	Timeball Hill	TBH/MCN2		0.32	73.32		344
2.3	Wang et al., 2015	Oxide facies (hematite), Yangjiacun BIF, Shanxi, China	YJC1-8		0.01			6.54
2.3	Wang et al., 2015	Oxide facies (hematite), Yangjiacun BIF, Shanxi, China	YJC1-9		0.01			8.08
2.3	Wang et al., 2015	Silicate-carbonate facies, Yangjiacun BIF, Shanxi, China	YJC4-2		0.02			8.05
2.3	Wang et al., 2015	Silicate-carbonate facies, Yangjiacun BIF, Shanxi, China	YJC4-1		0.02			4.27
2.3	Wang et al., 2015	Silicate facies, Yangjiacun BIF, Shanxi, China	YJC3-5		0.01			3.36
2.3	Wang et al., 2015	Silicate facies, Yangjiacun BIF, Shanxi, China	YJC3-4		0.01			5.9
2.3	Wang et al., 2015	Silicate facies, Yangjiacun BIF, Shanxi, China	YJC3-3		0.11			23.88
2.3	Wang et al., 2015	Silicate facies, Yangjiacun BIF, Shanxi, China	YJC3-2		0.01			2.84
2.3	Wang et al., 2015	Silicate facies, Yangjiacun BIF, Shanxi, China	YJC3-1		0.01			8.59
2.3	Wang et al., 2015	Oxide facies (magnetite), Yangjiacun BIF, Shanxi, China	YJC2-3		0.01			5.68
2.3	Wang et al., 2015	Oxide facies (magnetite), Yangjiacun BIF, Shanxi, China	YJC2-2		0.01			4.23
2.3	Wang et al., 2015	Oxide facies (magnetite), Yangjiacun BIF, Shanxi, China	YJC2-1		0.01			2.93
2.3	Wang et al., 2015	Silicate-carbonate facies, Yangjiacun BIF, Shanxi, China	YJC4-3		0.01			5.85
2.3	Wang et al., 2015	Silicate-carbonate facies, Yangjiacun BIF, Shanxi, China	YJC4-4		0.04			17.82
2.3	Wang et al., 2015	Oxide facies (hematite), Yangjiacun BIF, Shanxi, China	YJC1-7		0.01			6.86
2.3	Wang et al., 2015	Oxide facies (hematite), Yangjiacun BIF, Shanxi, China	YJC1-6		0.01			13.26
2.3	Wang et al., 2015	Oxide facies (hematite), Yangjiacun BIF, Shanxi, China	YJC1-5		0.01			7.43
2.3	Wang et al., 2015	Oxide facies (hematite), Yangjiacun BIF, Shanxi, China	YJC1-4		0.01			5.96
2.3	Wang et al., 2015	Oxide facies (hematite), Yangjiacun BIF, Shanxi, China	YJC1-3		0.01			8.24
2.3	Wang et al., 2015	Oxide facies (hematite), Yangjiacun BIF, Shanxi, China	YJC1-2		0.01			9.24
2.3	Wang et al., 2015	Oxide facies (hematite), Yangjiacun BIF, Shanxi, China	YJC1-1		0.01			19.9
2.3	Wang et al., 2015	Oxide-carbonate facies, Yangjiacun BIF, Shanxi, China	YJC4-5		0.01			5.78
2.25	Wang et al., 2016	Yuanjiacun BIF	WYJ-1	ferruginous quartzites interbedded with the Yang jiacun BIF	0.01			12.9
2.25	Wang et al., 2016	Yuanjiacun BIF	WYJ-2	ferruginous quartzites interbedded with the Yang jiacun BIF	0.01			4.83
2.25	Wang et al., 2016	Yuanjiacun BIF	WYJ-3	ferruginous quartzites interbedded with the Yang jiacun BIF	0.01			5.95
2.25	Wang et al., 2016	Yuanjiacun BIF	WYJ-6	ferruginous quartzites interbedded with the Yang jiacun BIF	0.01			11
2.25	Wang et al., 2016	Yuanjiacun BIF	WYJ-5	ferruginous quartzites interbedded with the Yang jiacun BIF	0.01			6.62
2.25	Wang et al., 2016	Yuanjiacun BIF	WYJ-4	ferruginous quartzites interbedded with the Yang jiacun BIF	0.02			9.56
2.235	Schneiderhan et al., 2006	Voelwater subgroup, Griqualand West, Transvaal supergroup, S. Africa (core REX-44)	7	siderite lutite	0.04			13
2.235	Schneiderhan et al., 2006	Voelwater subgroup, Griqualand West, Transvaal supergroup, S. Africa (core REX-44)	18	silicate facies BIF	<0.01			16
2.235	Schneiderhan et al., 2006	Voelwater subgroup, Griqualand West, Transvaal supergroup, S. Africa (core REX-44)	15	silicate facies BIF	0.05			12
2.235	Schneiderhan et al., 2006	Voelwater subgroup, Griqualand West, Transvaal supergroup, S. Africa (core REX-44)	33	microbanded oxide facies BIF	<0.01			4
2.235	Schneiderhan et al., 2006	Voelwater subgroup, Griqualand West, Transvaal supergroup, S. Africa (core REX-44)	1	biolaminated lime/dolostone	<0.01			10
2.235	Schneiderhan et al., 2006	Voelwater subgroup, Griqualand West, Transvaal supergroup, S. Africa (core REX-44)	16	braunite lutite	0.02			12
2.235	Schneiderhan et al., 2006	Voelwater subgroup, Griqualand West, Transvaal supergroup, S. Africa (core REX-44)	4	biolaminated lime/dolostone	<0.01			13
2.235	Schneiderhan et al., 2006	Voelwater subgroup, Griqualand West, Transvaal supergroup, S. Africa (core REX-44)	3	biolaminated lime/dolostone	0.01			9
2.235	Schneiderhan et al., 2006	Voelwater subgroup, Griqualand West, Transvaal supergroup, S. Africa (core REX-44)	10	siderite lutite	0.03			14
2.235	Schneiderhan et al., 2006	Voelwater subgroup, Griqualand West, Transvaal supergroup, S. Africa (core REX-44)	30 (L)	braunite lutite	0.013			7.5
2.235	Schneiderhan et al., 2006	Voelwater subgroup, Griqualand West, Transvaal supergroup, S. Africa (core REX-44)	29 (B)	braunite lutite	0.014			5.4
2.235	Schneiderhan et al., 2006	Voelwater subgroup, Griqualand West, Transvaal supergroup, S. Africa (core REX-44)	28 (N)	braunite lutite	0.012			15
2.235	Schneiderhan et al., 2006	Voelwater subgroup, Griqualand West, Transvaal supergroup, S. Africa (core REX-44)	26 (M)	braunite lutite	0.01			4.4
2.235	Schneiderhan et al., 2006	Voelwater subgroup, Griqualand West, Transvaal supergroup, S. Africa (core REX-44)	25 (Z)	braunite lutite	0.011			<0.1
2.235	Schneiderhan et al., 2006	Voelwater subgroup, Griqualand West, Transvaal supergroup, S. Africa (core REX-44)	24 (Y)	braunite lutite	0.02			<0.1
2.235	Schneiderhan et al., 2006	Voelwater subgroup, Griqualand West, Transvaal supergroup, S. Africa (core REX-44)	23 (X3)	braunite lutite	0.01			<0.1
2.235	Schneiderhan et al., 2006	Voelwater subgroup, Griqualand West, Transvaal supergroup, S. Africa (core REX-44)	22 (X2)	braunite lutite	0.01			<0.1
2.235	Schneiderhan et al., 2006	Voelwater subgroup, Griqualand West, Transvaal supergroup, S. Africa (core REX-44)	21 (X1)	braunite lutite	0.01			<0.1
2.235	Schneiderhan et al., 2006	Voelwater subgroup, Griqualand West, Transvaal supergroup, S. Africa (core REX-44)	20 (W)	braunite lutite	0.01			<0.1
2.235	Schneiderhan et al., 2006	Voelwater subgroup, Griqualand West, Transvaal supergroup, S. Africa (core REX-44)	19 (V)	braunite lutite	0.01			13
2.235	Schneiderhan et al., 2006	Voelwater subgroup, Griqualand West, Transvaal supergroup, S. Africa (core REX-44)	27 (C)	braunite lutite	0.012			4.3
2.235	Schneiderhan et al., 2006	Voelwater subgroup, Griqualand West, Transvaal supergroup, S. Africa (core REX-44)	13	braunite lutite	0.05			32
2.235	Schneiderhan et al., 2006	Voelwater subgroup, Griqualand West, Transvaal supergroup, S. Africa (core REX-44)	31	mesobanded oxide carbonate facies BIF	0.05			29
2.235	Schneiderhan et al., 2006	Voelwater subgroup, Griqualand West, Transvaal supergroup, S. Africa (core REX-44)	9	fenestral lime/dolostone	0.04			45
2.235	Schneiderhan et al., 2006	Voelwater subgroup, Griqualand West, Transvaal supergroup, S. Africa (core REX-44)	8	sandy detrital lime/dolostone	<0.01			13
2.235	Schneiderhan et al., 2006	Voelwater subgroup, Griqualand West, Transvaal supergroup, S. Africa (core REX-44)	32	microbanded oxide facies BIF	0.02			3
2.235	Schneiderhan et al., 2006	Voelwater subgroup, Griqualand West, Transvaal supergroup, S. Africa (core REX-44)	35	microbanded oxide facies BIF	0.03			19
2.235	Schneiderhan et al., 2006	Voelwater subgroup, Griqualand West, Transvaal supergroup, S. Africa (core REX-44)	11	mesobanded oxide carbonate facies BIF	0.01			16
2.235	Schneiderhan et al., 2006	Voelwater subgroup, Griqualand West, Transvaal supergroup, S. Africa (core REX-44)	6	sandy detrital lime/dolostone	0.23			36
2.235	Schneiderhan et al., 2006	Voelwater subgroup, Griqualand West, Transvaal supergroup, S. Africa (core REX-44)	2	fenestral lime/dolostone	0.01			19
2.235	Schneiderhan et al., 2006	Voelwater subgroup, Griqualand West, Transvaal supergroup, S. Africa (core REX-44)	5	laminated lime/dolostone	<0.01			9
2.235	Schneiderhan et al., 2006	Voelwater subgroup, Griqualand West, Transvaal supergroup, S. Africa (core REX-44)	12	hematite lutite	0.05			29
2.235	Schneiderhan et al., 2006	Voelwater subgroup, Griqualand West, Transvaal supergroup, S. Africa (core REX-44)	14	hematite lutite	0.02			36
2.235	Schneiderhan et al., 2006	Voelwater subgroup, Griqualand West, Transvaal supergroup, S. Africa (core REX-44)	17	hematite lutite	0.04			26
2.2	Tsikos and Moore., 1997	Hotazel - South Africa	5	Fe-Mn bearing carbonate unit	0.05	9.66	0.43	nd
2.2	Tsikos and Moore., 1997	Hotazel - South Africa	12	oxide facies bande iron-formation	0.05	28.54	0.39	6
2.2	Tsikos and Moore., 1997	Hotazel - South Africa	10	Silicate facies banded iron-formation	0.05	7.13	nd	9
2.2	Tsikos and Moore., 1997	Hotazel - South Africa	8	Silicate facies banded iron-formation	0.04	13.81	1.34	9
2.2	Tsikos and Moore., 1997	Hotazel - South Africa	7	Silicate facies banded iron-formation	0.04	24.56	nd	<4
2.2	Tsikos and Moore., 1997	Hotazel - South Africa	2	carbonate facies banded iron-formation	0.04	22.84	0.34	<4
2.2	Tsikos and Moore., 1997	Hotazel - South Africa	9	Silicate facies banded iron-formation	0.04	20.59	nd	<4
2.2	Tsikos and Moore., 1997	Hotazel - South Africa	4	carbonate facies banded iron-formation	0.04	28.73	0.54	<4
2.2	Tsikos and Moore., 1997	Hotazel - South Africa	11	Silicate facies banded iron-formation	0.05	20.16	1.76	<4
2.2	Tsikos and Moore., 1997	Hotazel - South Africa	3	carbonate facies banded iron-formation	0.05	23.41	nd	5
2.2	Tsikos and Moore., 1997	Hotazel - South Africa	1	carbonate facies banded iron-formation	0.03	19.26	0.23	<4
2.2	Tsikos and Moore., 1997	Hotazel - South Africa	6	carbonate facies banded iron-formation	0.03	21.09	0.34	<4
2.1	Mucke, 2005	Maraba Hill, Maru Greenstone Belt, Nigeria	1-87	magnetite-silicate facies IF	0.12	53		48
2.1	Mucke, 2005	Maraba Hill, Maru Greenstone Belt, Nigeria	ME5	magnetite-silicate facies IF	0.13	47.6		21
2.1	Mucke, 2005	Koriga IF, Kushaka greenstone belt, Nigeria	K2	silicate facies IF	0.14	14.9		31
2.1	Mucke, 2005	Koriga IF, Kushaka greenstone belt, Nigeria	K4	silicate facies IF	0.19	6.15		38
2.1	Mucke, 2005	South of Ruwan Doruwa, Maru Greenstone Belt, Nigeria	RD33	silicate facies IF	0.35	2.49		74
2.1	Mucke, 2005	South of Ruwan Doruwa, Maru Greenstone Belt, Nigeria	RD30	silicate facies IF	0.22	14.94		38
2.1	Mucke, 2005	Ruwan Doruwa, Maru Greenstone Belt, Nigeria	RD61	magnetite-silicate facies IF	0.12	44.2		24
2.1	Mucke, 2005	Ruwan Doruwa, Maru Greenstone Belt, Nigeria	RD19	magnetite-silicate facies IF	0.21	48.6		72
2.1	Mucke, 2005	Ruwan Doruwa, Maru Greenstone Belt, Nigeria	RD23	magnetite-silicate facies IF	0.20	41.99		46
2.1	Mucke, 2005	Ruwan Doruwa, Maru Greenstone Belt, Nigeria	RD24	magnetite-silicate facies IF	0.17	45.1		38
2.1	Mucke, 2005	South of Ruwan Doruwa, Maru Greenstone Belt, Nigeria	RD34	silicate facies IF	1	4.51		83
2.1	Mucke, 2005	Obajana Greenstone Belt, Nigeria	OB2	hematite-silicate faceis IF	0.02	43.8		<5
2.1	Mucke, 2005	South of Ruwan Doruwa, Maru Greenstone Belt, Nigeria	RD31	silicate facies IF	0.41	9.17		75
2.1	Mucke, 2005	South of Ruwan Doruwa, Maru Greenstone Belt, Nigeria	RD15	silicate facies IF	0.45	16		38
2.1	Mucke, 2005	South of Ruwan Doruwa, Maru Greenstone Belt, Nigeria	RD26	silicate facies IF	0.39	9.95		62
2.1	Mucke, 2005	Koriga IF, Kushaka greenstone belt, Nigeria	K6	magnetite-silicate facies IF	0.21	26.97		49
2.1	Mucke, 2005	Obajana Greenstone Belt, Nigeria	OB6	hematite-silicate faceis IF	0.01	36.2		12
2.1	Mucke, 2005	Muro Greenstone Belt, Nigeria	M92	hematite-silicate faceis IF	0.06	92.3		368
2.1	Mucke, 2005	Muro Greenstone Belt, Nigeria	M3	hematite-silicate faceis IF	0.39	42.4		90
2.1	Mucke, 2005	Muro Greenstone Belt, Nigeria	M27	hematite-silicate faceis IF	0.01	47		<5
2.1	Mucke, 2005	Muro Greenstone Belt, Nigeria	M1	hematite-silicate faceis IF	0.01	41.8		5
2.1	Mucke, 2005	Koriga IF, Kushaka greenstone belt, Nigeria	K3	silicate facies IF	0.17	4.99		42
2.1	Mucke, 2005	Ruwan Doruwa, Maru Greenstone Belt, Nigeria	RD58	magnetite-silicate facies IF	0.26	45.7		42
2.1	Mucke, 2005	Egbe-Isanlu Greenstone Belt, Nigeria	Sb4	silicate facies IF	0.38	3.25		60
2.1	Mucke, 2005	Birnin Gwari Greenstone Belt, Nigeria	Co34	silicate facies IF	0.21	3.57		34
2.1	Mucke, 2005	Koriga IF, Kushaka greenstone belt, Nigeria	K7	magnetite-silicate facies IF	0.11	26.2		67
2.1	Mucke, 2005	Koriga IF, Kushaka greenstone belt, Nigeria	K1	magnetite-silicate facies IF	0.07	27.9		18
2.1	Mucke, 2005	Egbe-Isanlu Greenstone Belt, Nigeria	IT6	silicate facies IF	0.36	7.77		59
2.1	Mucke, 2005	Egbe-Isanlu Greenstone Belt, Nigeria	BG9	silicate facies IF	0.48	14.2		67
2.1	Mucke, 2005	Egbe-Isanlu Greenstone Belt, Nigeria	BG6	silicate facies IF	0.13	8.49		41
2.1	Mucke, 2005	Egbe-Isanlu Greenstone Belt, Nigeria	BG3	silicate facies IF	0.29	8.54		39
2.1	Mucke, 2005	Egbe-Isanlu Greenstone Belt, Nigeria	S3	silicate facies IF	0.09	6.27		30
2.1	Mucke, 2005	Egbe-Isanlu Greenstone Belt, Nigeria	IT3	silicate facies IF	0.37	4.48		39
2.1	Mucke, 2005	Egbe-Isanlu Greenstone Belt, Nigeria	SB1	silicate facies IF	0.36	1.1		59
2.1	Mucke, 2005	Birnin Gwari Greenstone Belt, Nigeria	2046	silicate facies IF	0.11	1.94		26
2.1	Mucke, 2005	Birnin Gwari Greenstone Belt, Nigeria	FQ42	silicate facies IF	0.43	9.89		50
2.1	Mucke, 2005	Birnin Gwari Greenstone Belt, Nigeria	Co42	silicate facies IF	0.35	2.76		59
2.1	Mucke, 2005	Birnin Gwari Greenstone Belt, Nigeria	Co30	silicate facies IF	0.30	3		26
2.1	Mucke, 2005	Birnin Gwari Greenstone Belt, Nigeria	2074	silicate facies IF	0.23	4.77		31
2.1	Mucke, 2005	Egbe-Isanlu Greenstone Belt, Nigeria	Sb6	silicate facies IF	0.31	2.13		29
2.1	Mucke, 2005	Birnin Gwari Greenstone Belt, Nigeria	Co40	silicate facies IF	0.33	2.94		44
2.1	Mucke, 2005	Bingi, Maru greenstone belt, Nigeria	Bi6	magnetite-silicate facies IF	0.18	29.7		32
2.1	Mucke, 2005	Area south of Maraba Hill, Maru Greenstone Belt, Nigeria	MF5	magnetite-silicate facies IF	0.16	18.7		18
2.1	Mucke, 2005	Area south of Maraba Hill, Maru Greenstone Belt, Nigeria	M18	magnetite-silicate facies IF	0.12	32.6		43
2.1	Mucke, 2005	Area south of Maraba Hill, Maru Greenstone Belt, Nigeria	ME8	magnetite-silicate facies IF	0.15	35.65		37
2.1	Mucke, 2005	Area south of Maraba Hill, Maru Greenstone Belt, Nigeria	MC9	magnetite-silicate facies IF	0.11	44.93		28
2.1	Mucke, 2005	Birnin Gwari Greenstone Belt, Nigeria	Co11	silicate facies IF	0.28	4.53		38
2.1	Mucke, 2005	Bingi, Maru greenstone belt, Nigeria	Bi7	magnetite-silicate facies IF	0.20	26.3		43
2.1	Mucke, 2005	Area south of Maraba Hill, Maru Greenstone Belt, Nigeria	TK5	silicate facies IF	0.59	4.1
2.1	Mucke, 2005	Birnin Gwari Greenstone Belt, Nigeria	IB2	magnetite-silicate facies IF	0.10	53		40
2.1	Mucke, 2005	Bingi, Maru greenstone belt, Nigeria	Bi21	silicate facies, contact-metamorphic IF	0.24	16.1		38
2.1	Mucke, 2005	Birnin Gwari Greenstone Belt, Nigeria	IB4	magnetite-silicate facies IF	0.10	19.6		29
2.1	Mucke, 2005	Bingi, Maru greenstone belt, Nigeria	Bi24	silicate facies, contact-metamorphic IF	0.10	20.5		43
2.1	Mucke, 2005	Ruwan Doruwa, Maru Greenstone Belt, Nigeria	RD22	magnetite-silicate facies IF	0.22	28.57		52
2.1	Mucke, 2005	Bingi, Maru greenstone belt, Nigeria	Bi3	magnetite-silicate facies IF	0.14	42.1		39
2.1	Adekoya, 1998	Maru Banded Iron Formation, Nigeria	6	oxide facies banded iron formation	0.18			57
2.1	Adekoya, 1998	Maru Banded Iron Formation, Nigeria	5	oxide facies banded iron formation	0.11			60
2.1	Adekoya, 1998	Maru Banded Iron Formation, Nigeria	14	oxide facies banded iron formation	0.11	45.8		40
2.1	Adekoya, 1998	Maru Banded Iron Formation, Nigeria	15	oxide facies banded iron formation	0.03	41.72		27
2.1	Adekoya, 1998	Maru Banded Iron Formation, Nigeria	9	oxide facies banded iron formation	0.16			38
2.1	Adekoya, 1998	Maru Banded Iron Formation, Nigeria	13	oxide facies banded iron formation	0.14			35
2.1	Adekoya, 1998	Maru Banded Iron Formation, Nigeria	12	oxide facies banded iron formation	0.16	46.32		48
2.1	Adekoya, 1998	Maru Banded Iron Formation, Nigeria	11	oxide facies banded iron formation	0.12	43.65		30
2.1	Adekoya, 1998	Maru Banded Iron Formation, Nigeria	10	oxide facies banded iron formation	0.15	40.35		55
2.1	Adekoya, 1998	Maru Banded Iron Formation, Nigeria	7	oxide facies banded iron formation	0.17			52
2.1	Adekoya, 1998	Maru Banded Iron Formation, Nigeria	8	oxide facies banded iron formation	0.16			48
2.1	Adekoya, 1998	Maru Banded Iron Formation, Nigeria	3	oxide facies banded iron formation	0.01			25
2.1	Adekoya, 1998	Maru Banded Iron Formation, Nigeria	4	oxide facies banded iron formation	0.28			61
2.1	Adekoya, 1998	Maru Banded Iron Formation, Nigeria	2	oxide facies banded iron formation	0.13			41
2.1	Adekoya, 1998	Maru Banded Iron Formation, Nigeria	1	oxide facies banded iron formation	0.2			44
2.05	Tamehe et al., 2018	Kpwa-Atog Boga area, Nyong unit, Ntem complex, Cameroon	KP5		0.01
2.05	Tamehe et al., 2018	Kpwa-Atog Boga area, Nyong unit, Ntem complex, Cameroon	KP6		0.11
2.05	Tamehe et al., 2018	Kpwa-Atog Boga area, Nyong unit, Ntem complex, Cameroon	AB6		2.07
2.05	Tamehe et al., 2018	Kpwa-Atog Boga area, Nyong unit, Ntem complex, Cameroon	AB5		0.16
2.05	Tamehe et al., 2018	Kpwa-Atog Boga area, Nyong unit, Ntem complex, Cameroon	KP10		0.29			12
2.05	Tamehe et al., 2018	Kpwa-Atog Boga area, Nyong unit, Ntem complex, Cameroon	KP9		0.42			13
2.05	Tamehe et al., 2018	Kpwa-Atog Boga area, Nyong unit, Ntem complex, Cameroon	KP4		0.08
1.88	Sindol et al., 2022	Sokoman iron formation	URC233	According to email with Mike the trace elemental data was divided by 1000	0.032	38.119		0.008238
1.88	Sindol et al., 2022	Sokoman iron formation	JUIF228	According to email with Mike the trace elemental data was divided by 1000	0.019	42.892		0.0176
1.88	Sindol et al., 2022	Sokoman iron formation	JUIF229	According to email with Mike the trace elemental data was divided by 1000	0.02	62.5		0.02357
1.88	Sindol et al., 2022	Sokoman iron formation	JUIF230	According to email with Mike the trace elemental data was divided by 1000	0.02	24.961		0.007675
1.88	Sindol et al., 2022	Sokoman iron formation	JUIF231	According to email with Mike the trace elemental data was divided by 1000	0.026	44.861		0.009267
1.88	Sindol et al., 2022	Sokoman iron formation	GC232	According to email with Mike the trace elemental data was divided by 1000	0.019	31.722		0.006848
1.88	Sindol et al., 2022	Sokoman iron formation	URC272	According to email with Mike the trace elemental data was divided by 1000	0.018	44.04		0.002807
1.88	Sindol et al., 2022	Sokoman iron formation	URC235	According to email with Mike the trace elemental data was divided by 1000	0.018	44.629		0.004379
1.88	Sindol et al., 2022	Sokoman iron formation	PGC236	According to email with Mike the trace elemental data was divided by 1000	0.017	47.336		0.00261
1.88	Sindol et al., 2022	Sokoman iron formation	PGC238	According to email with Mike the trace elemental data was divided by 1000	0.022	52.622		0.01562
1.88	Sindol et al., 2022	Sokoman iron formation	LRC239	According to email with Mike the trace elemental data was divided by 1000	0.02	37.791		0.004702
1.88	Sindol et al., 2022	Sokoman iron formation	LRGC241	According to email with Mike the trace elemental data was divided by 1000	0.03	46.446		0.009071
1.88	Sindol et al., 2022	Sokoman iron formation	LRGC247	According to email with Mike the trace elemental data was divided by 1000	0.05	58.669		0.01369
1.88	Sindol et al., 2022	Sokoman iron formation	LRGC250	According to email with Mike the trace elemental data was divided by 1000	0.048	43.633		0.01306
1.88	Sindol et al., 2022	Sokoman iron formation	LIF252	According to email with Mike the trace elemental data was divided by 1000	0.024	19.542		0.006548
1.88	Sindol et al., 2022	Sokoman iron formation	JUIF254	According to email with Mike the trace elemental data was divided by 1000	0.02	25.52		0.001377
1.88	Sindol et al., 2022	Sokoman iron formation	GC256	According to email with Mike the trace elemental data was divided by 1000	0.021	27.454		0.01122
1.88	Sindol et al., 2022	Sokoman iron formation	LC226	According to email with Mike the trace elemental data was divided by 1000	0.018	30.542		0.004864
1.88	Sindol et al., 2022	Sokoman iron formation	LC227	According to email with Mike the trace elemental data was divided by 1000	0.014	16.179		0.0009615
1.88	Sindol et al., 2022	Sokoman iron formation	JUIF025	According to email with Mike the trace elemental data was divided by 1000	0.02	36.232		0.005196
1.88	Sindol et al., 2022	Sokoman iron formation	LC224	According to email with Mike the trace elemental data was divided by 1000	0.018	27.363		0.005046
1.88	Sindol et al., 2022	Sokoman iron formation	URC041	According to email with Mike the trace elemental data was divided by 1000	0.015	35.801		0.009482
1.88	Sindol et al., 2022	Sokoman iron formation	LC066	According to email with Mike the trace elemental data was divided by 1000	0.07	40.842		0.01982
1.88	Sindol et al., 2022	Sokoman iron formation	LC011	According to email with Mike the trace elemental data was divided by 1000	0.023	43.571		0.02472
1.88	Sindol et al., 2022	Sokoman iron formation	JUIF018	According to email with Mike the trace elemental data was divided by 1000	0.024	31.566		0.01688
1.88	Sindol et al., 2022	Sokoman iron formation	JUIF073B	According to email with Mike the trace elemental data was divided by 1000	0.016	43.56		0.01873
1.88	Sindol et al., 2022	Sokoman iron formation	JUIF032	According to email with Mike the trace elemental data was divided by 1000	0.021	55.482		0.01877
1.88	Sindol et al., 2022	Sokoman iron formation	JUIF037	According to email with Mike the trace elemental data was divided by 1000	0.08	63.649		0.0181
1.88	Sindol et al., 2022	Sokoman iron formation	GC039	According to email with Mike the trace elemental data was divided by 1000	0.021	37.645		0.02897
1.88	Sindol et al., 2022	Sokoman iron formation	PGC045	According to email with Mike the trace elemental data was divided by 1000	0.013	48.683		0.009914
1.88	Sindol et al., 2022	Sokoman iron formation	LC221	According to email with Mike the trace elemental data was divided by 1000	0.019	31.525		0.01357
1.88	Sindol et al., 2022	Sokoman iron formation	LRC047	According to email with Mike the trace elemental data was divided by 1000	0.02	41.535		0.01411
1.88	Sindol et al., 2022	Sokoman iron formation	LRGC051	According to email with Mike the trace elemental data was divided by 1000	0.014	53.868		0.008111
1.88	Sindol et al., 2022	Sokoman iron formation	LRGC055	According to email with Mike the trace elemental data was divided by 1000	0.073	57.317		0.01915
1.88	Sindol et al., 2022	Sokoman iron formation	LRGC061	According to email with Mike the trace elemental data was divided by 1000	0.041	40.859		0.009055
1.88	Sindol et al., 2022	Sokoman iron formation	LIF063	According to email with Mike the trace elemental data was divided by 1000	0.023	33.975		0.006118
1.88	Sindol et al., 2022	Sokoman iron formation	LC216	According to email with Mike the trace elemental data was divided by 1000	0.019	17.261		0.006581
1.88	Sindol et al., 2022	Sokoman iron formation	LC217	According to email with Mike the trace elemental data was divided by 1000	0.023	33.708		0.01463
1.88	Sindol et al., 2022	Sokoman iron formation	LC069	According to email with Mike the trace elemental data was divided by 1000	0.013	9.698		0.00122
1.88	Sindol et al., 2022	Sokoman iron formation	JUIF073C	According to email with Mike the trace elemental data was divided by 1000	0.012	6.389		0.003064
1.88	Sindol et al., 2022	Sokoman iron formation	PGC276	According to email with Mike the trace elemental data was divided by 1000	0.018	39.501		0.00837
1.88	Sindol et al., 2022	Sokoman iron formation	JUIF175C	According to email with Mike the trace elemental data was divided by 1000	0.016	10.94		0.003406
1.88	Sindol et al., 2022	Sokoman iron formation	JSP140C	According to email with Mike the trace elemental data was divided by 1000	0.026	18.387		0.0004711
1.88	Sindol et al., 2022	Sokoman iron formation	LRGC201	According to email with Mike the trace elemental data was divided by 1000	0.012	49.954		0.01038
1.88	Sindol et al., 2022	Sokoman iron formation	LIF204	According to email with Mike the trace elemental data was divided by 1000	0.012	32.164		0.006496
1.88	Sindol et al., 2022	Sokoman iron formation	LIF212	According to email with Mike the trace elemental data was divided by 1000	0.014	22.334		0.02481
1.88	Sindol et al., 2022	Sokoman iron formation	LC166	According to email with Mike the trace elemental data was divided by 1000	0.028	25.693		0.01222
1.88	Sindol et al., 2022	Sokoman iron formation	JUIF171	According to email with Mike the trace elemental data was divided by 1000	0.039	39.162		0.01408
1.88	Sindol et al., 2022	Sokoman iron formation	JUIF175B	According to email with Mike the trace elemental data was divided by 1000	0.036	40.576		0.006424
1.88	Sindol et al., 2022	Sokoman iron formation	JUIF179B	According to email with Mike the trace elemental data was divided by 1000	0.09	37.112		0.01581
1.88	Sindol et al., 2022	Sokoman iron formation	RTH296	According to email with Mike the trace elemental data was divided by 1000	0.583	11.12		0.08547
1.88	Sindol et al., 2022	Sokoman iron formation	JUIF179C	According to email with Mike the trace elemental data was divided by 1000	0.02	9.605		0.005391
1.88	Sindol et al., 2022	Sokoman iron formation	GC184	According to email with Mike the trace elemental data was divided by 1000	0.016	31.803		0.01095
1.88	Sindol et al., 2022	Sokoman iron formation	URC191	According to email with Mike the trace elemental data was divided by 1000	0.054	46.808		0.01808
1.88	Sindol et al., 2022	Sokoman iron formation	PGC194B	According to email with Mike the trace elemental data was divided by 1000	0.181	31.744		0.03196
1.88	Sindol et al., 2022	Sokoman iron formation	PGC194C	According to email with Mike the trace elemental data was divided by 1000	0.022	6.225		0.003344
1.88	Sindol et al., 2022	Sokoman iron formation	LRGC197B	According to email with Mike the trace elemental data was divided by 1000	0.075	60.413		0.02348
1.88	Sindol et al., 2022	Sokoman iron formation	LRGC197C	According to email with Mike the trace elemental data was divided by 1000	0.014	17.94		0.00564
1.88	Sindol et al., 2022	Sokoman iron formation	JSP140B	According to email with Mike the trace elemental data was divided by 1000	0.064	57.3		0.02069
1.88	Sindol et al., 2022	Sokoman iron formation	LRGC138	According to email with Mike the trace elemental data was divided by 1000	0.013	43.444		0.001917
1.88	Sindol et al., 2022	Sokoman iron formation	PGC135	According to email with Mike the trace elemental data was divided by 1000	0.011	20.675		0.0001722
1.88	Sindol et al., 2022	Sokoman iron formation	URC133C	According to email with Mike the trace elemental data was divided by 1000	0.011	18.314		0.003154
1.88	Sindol et al., 2022	Sokoman iron formation	LRGC280	According to email with Mike the trace elemental data was divided by 1000	0.017	43.457		0.005619
1.88	Sindol et al., 2022	Sokoman iron formation	LRGC284	According to email with Mike the trace elemental data was divided by 1000	0.017	40.259		0.004587
1.88	Sindol et al., 2022	Sokoman iron formation	JSP289	According to email with Mike the trace elemental data was divided by 1000	0.025	55.25		0.02551
1.88	Sindol et al., 2022	Sokoman iron formation	JSP294	According to email with Mike the trace elemental data was divided by 1000	0.022	14.706		0.007958
1.88	Sindol et al., 2022	Sokoman iron formation	LC114	According to email with Mike the trace elemental data was divided by 1000	0.014	20.382		0.00679
1.88	Sindol et al., 2022	Sokoman iron formation	JUIF116	According to email with Mike the trace elemental data was divided by 1000	0.175	61.89		0.02884
1.88	Sindol et al., 2022	Sokoman iron formation	JUIF119	According to email with Mike the trace elemental data was divided by 1000	0.035	42.422		0.01382
1.88	Sindol et al., 2022	Sokoman iron formation	GC120	According to email with Mike the trace elemental data was divided by 1000	0.012	25.351		0.00619
1.88	Sindol et al., 2022	Sokoman iron formation	JUIF121B	According to email with Mike the trace elemental data was divided by 1000	0.022	44.583		0.02083
1.88	Sindol et al., 2022	Sokoman iron formation	JUIF121C	According to email with Mike the trace elemental data was divided by 1000	0.011	15.446		0.009193
1.88	Sindol et al., 2022	Sokoman iron formation	JUIF124	According to email with Mike the trace elemental data was divided by 1000	0.02	17.808		0.001502
1.88	Sindol et al., 2022	Sokoman iron formation	JUIF127	According to email with Mike the trace elemental data was divided by 1000	0.01	42.951		0.01107
1.88	Sindol et al., 2022	Sokoman iron formation	JUIF131	According to email with Mike the trace elemental data was divided by 1000	0.024	38.973		0.007775
1.88	Sindol et al., 2022	Sokoman iron formation	GC132	According to email with Mike the trace elemental data was divided by 1000	0.041	14.917		0.00663
1.88	Sindol et al., 2022	Sokoman iron formation	URC133B	According to email with Mike the trace elemental data was divided by 1000	0.014	47.644		0.01275
1.88	Sindol et al., 2022	Sokoman iron formation	LRGC198	According to email with Mike the trace elemental data was divided by 1000	0.062	64.258		0.02996
1.88	Sindol et al., 2022	Sokoman iron formation	RTH141	According to email with Mike the trace elemental data was divided by 1000	0.599	11.781		0.09819
1.88	Sindol et al., 2022	Sokoman iron formation	JUIF079	According to email with Mike the trace elemental data was divided by 1000	0.014	33.348		0.00356
1.88	Sindol et al., 2022	Sokoman iron formation	LIF112	According to email with Mike the trace elemental data was divided by 1000	0.066	24.245		0.01565
1.88	Sindol et al., 2022	Sokoman iron formation	PGC152	According to email with Mike the trace elemental data was divided by 1000	0.013	41.942		0.004961
1.88	Sindol et al., 2022	Sokoman iron formation	PGC150	According to email with Mike the trace elemental data was divided by 1000	0.011	34.737		0.001451
1.88	Sindol et al., 2022	Sokoman iron formation	URC148C	According to email with Mike the trace elemental data was divided by 1000	0.012	17.675		0.0035
1.88	Sindol et al., 2022	Sokoman iron formation	URC148B	According to email with Mike the trace elemental data was divided by 1000	0.013	46.88		0.004958
1.88	Sindol et al., 2022	Sokoman iron formation	GC147	According to email with Mike the trace elemental data was divided by 1000	0.017	3.947		0.001534
1.88	Sindol et al., 2022	Sokoman iron formation	JUIF146	According to email with Mike the trace elemental data was divided by 1000	0.02	44.116		0.0153
1.88	Sindol et al., 2022	Sokoman iron formation	LC145	According to email with Mike the trace elemental data was divided by 1000	0.01	36.617		0.004615
1.88	Sindol et al., 2022	Sokoman iron formation	LIF109	According to email with Mike the trace elemental data was divided by 1000	0.031	41.941		0.009929
1.88	Sindol et al., 2022	Sokoman iron formation	RTH142	According to email with Mike the trace elemental data was divided by 1000	0.507	13.288		0.08493
1.88	Sindol et al., 2022	Sokoman iron formation	LRGC103	According to email with Mike the trace elemental data was divided by 1000	0.013	37.377		0.002246
1.88	Sindol et al., 2022	Sokoman iron formation	LRGC094	According to email with Mike the trace elemental data was divided by 1000	0.012	47.676		0.007745
1.88	Sindol et al., 2022	Sokoman iron formation	LRC092	According to email with Mike the trace elemental data was divided by 1000	0.015	51.837		0.01136
1.88	Sindol et al., 2022	Sokoman iron formation	PGC088	According to email with Mike the trace elemental data was divided by 1000	0.015	47.97		0.004795
1.88	Sindol et al., 2022	Sokoman iron formation	URC086	According to email with Mike the trace elemental data was divided by 1000	0.018	30.201		0.004957
1.88	Sindol et al., 2022	Sokoman iron formation	GC085	According to email with Mike the trace elemental data was divided by 1000	0.015	47.205		0.0050535
1.88	Sindol et al., 2022	Sokoman iron formation	JUIF083	According to email with Mike the trace elemental data was divided by 1000	0.065	68.618		0.02799
1.88	Sindol et al., 2022	Sokoman iron formation	LRGC154	According to email with Mike the trace elemental data was divided by 1000	0.013	33.211		0.004656
1.88	Sindol et al., 2022	Sokoman iron formation	JSP158B	According to email with Mike the trace elemental data was divided by 1000	0.024	26.553		0.00482
1.88	Sindol et al., 2022	Sokoman iron formation	JSP158C	According to email with Mike the trace elemental data was divided by 1000	0.013	5.073		0.001596
1.88	Sindol et al., 2022	Sokoman iron formation	JSP163B	According to email with Mike the trace elemental data was divided by 1000	0.025	39.869		0.005937
1.88	Sindol et al., 2022	Sokoman iron formation	MS002	According to email with Mike the trace elemental data was divided by 1000	0.656	3.704		218.2
1.88	Sindol et al., 2022	Sokoman iron formation	MS005	According to email with Mike the trace elemental data was divided by 1000	0.083	1.643		114.8
1.88	Sindol et al., 2022	Sokoman iron formation	DOL113	According to email with Mike the trace elemental data was divided by 1000	0.098	1.218		7.192
1.88	Sindol et al., 2022	Sokoman iron formation	DOL300	According to email with Mike the trace elemental data was divided by 1000	0.043	28.5		16.68
1.88	Sindol et al., 2022	Sokoman iron formation	BC143	According to email with Mike the trace elemental data was divided by 1000	0.014	2.473		2.702
1.88	Sindol et al., 2022	Sokoman iron formation	GC269	According to email with Mike the trace elemental data was divided by 1000	0.018	6.743		0.00696
1.88	Sindol et al., 2022	Sokoman iron formation	LC264	According to email with Mike the trace elemental data was divided by 1000	0.023	40.956		0.01238
1.88	Sindol et al., 2022	Sokoman iron formation	LC263	According to email with Mike the trace elemental data was divided by 1000	0.019	41.217		0.009821
1.88	Sindol et al., 2022	Sokoman iron formation	LC260	According to email with Mike the trace elemental data was divided by 1000	0.017	29.329		0.005919
1.88	Sindol et al., 2022	Sokoman iron formation	JUIF311	According to email with Mike the trace elemental data was divided by 1000	0.017	18.439		0.01109
1.88	Sindol et al., 2022	Sokoman iron formation	JUIF309	According to email with Mike the trace elemental data was divided by 1000	0.02	31.345		0.006431
1.88	Sindol et al., 2022	Sokoman iron formation	JUIF307	According to email with Mike the trace elemental data was divided by 1000	0.022	29.252		0.01633
1.88	Sindol et al., 2022	Sokoman iron formation	JUIF304	According to email with Mike the trace elemental data was divided by 1000	0.094	48.478		0.01833
1.88	Sindol et al., 2022	Sokoman iron formation	LC302	According to email with Mike the trace elemental data was divided by 1000	0.05	47.966		0.03243
1.88	Sindol et al., 2022	Sokoman iron formation	JSP163C	According to email with Mike the trace elemental data was divided by 1000	0.015	8.19		3.689e-05
1.88	Sindol et al., 2022	Sokoman iron formation	LC267	According to email with Mike the trace elemental data was divided by 1000	0.017	49.46		0.0132
1.88	Chung et al., 2015	Labrador Trough, Canada	RL-167-6	Sokoman iron formation, Altered magnetite in the iron formation	0.0014541		0.113754	47.0752
1.88	Chung et al., 2015	Labrador Trough, Canada	HY-77-12	Sokoman iron formation, Altered magnetite in the iron formation	0.0162101		1.30599	29.3687
1.88	Chung et al., 2015	Labrador Trough, Canada	HY-176-1	Sokoman iron formation, Altered magnetite in the iron formation	0.0485169		0.736474	51.0683
1.88	Chung et al., 2015	Labrador Trough, Canada	HY-77-20	Sokoman iron formation, Altered magnetite in the iron formation	0.0486402		0.383413	33.0779
1.88	Chung et al., 2015	Labrador Trough, Canada	HY-77-19	Sokoman iron formation, Altered magnetite in the iron formation	0.0210115		0.250022	34.9384
1.88	Chung et al., 2015	Labrador Trough, Canada	HY-77-18	Sokoman iron formation, Altered magnetite in the iron formation	0.0100136		0.394109	39.2701
1.88	Chung et al., 2015	Labrador Trough, Canada	HY-77-17	Sokoman iron formation, Altered magnetite in the iron formation	0.0068846		0.266557	39.8823
1.88	Chung et al., 2015	Labrador Trough, Canada	HY-77-16	Sokoman iron formation, Altered magnetite in the iron formation	0.00621374		0.278285	37.9102
1.88	Chung et al., 2015	Labrador Trough, Canada	HY-77-15	Sokoman iron formation, Altered magnetite in the iron formation	0.0537582		0.352705	35.3938
1.88	Chung et al., 2015	Labrador Trough, Canada	HY-77-14	Sokoman iron formation, Altered magnetite in the iron formation	0.277212		1.27303	49.1369
1.88	Chung et al., 2015	Labrador Trough, Canada	HY-77-13	Sokoman iron formation, Altered magnetite in the iron formation	0.0110551		0.818843	35.7546
1.88	Chung et al., 2015	Labrador Trough, Canada	W-061-01	Sokoman iron formation, Primary (early) magnetite in the iron formation	0.00185522		0.729749	21.4437
1.88	Chung et al., 2015	Labrador Trough, Canada	W-061-02	Sokoman iron formation, Primary (early) magnetite in the iron formation	0.015727		1.69534	45.5676
1.88	Chung et al., 2015	Labrador Trough, Canada	W-061-03	Sokoman iron formation, Primary (early) magnetite in the iron formation	0.00100901		1.19905	27.6708
1.88	Chung et al., 2015	Labrador Trough, Canada	W-061-04	Sokoman iron formation, Primary (early) magnetite in the iron formation	0.00162007		0.948107	34.1229
1.88	Chung et al., 2015	Labrador Trough, Canada	W-061-05	Sokoman iron formation, Primary (early) magnetite in the iron formation	0.00332451		1.36117	26.8491
1.88	Chung et al., 2015	Labrador Trough, Canada	W-061-06	Sokoman iron formation, Primary (early) magnetite in the iron formation	0.00148124		0.614801	22.2293
1.88	Chung et al., 2015	Labrador Trough, Canada	W-061-07	Sokoman iron formation, Primary (early) magnetite in the iron formation	0.00196455		0.497793	29.9376
1.88	Chung et al., 2015	Labrador Trough, Canada	W-061-08	Sokoman iron formation, Primary (early) magnetite in the iron formation	0.00603345		0.760707	17.8605
1.88	Chung et al., 2015	Labrador Trough, Canada	W-061-09	Sokoman iron formation, Primary (early) magnetite in the iron formation	0.00118124		0.60893	24.5959
1.88	Chung et al., 2015	Labrador Trough, Canada	W-061-10	Sokoman iron formation, Primary (early) magnetite in the iron formation	0.00235509		1.10486	21.8013
1.88	Chung et al., 2015	Labrador Trough, Canada	W-061-11	Sokoman iron formation, Primary (early) magnetite in the iron formation	0.00133995		0.555513	25.1511
1.88	Chung et al., 2015	Labrador Trough, Canada	W-061-12	Sokoman iron formation, Primary (early) magnetite in the iron formation	0.00131899		0.756147	22.0032
1.88	Chung et al., 2015	Labrador Trough, Canada	W-061-13	Sokoman iron formation, Primary (early) magnetite in the iron formation	0.00151504		0.268355	23.3153
1.88	Chung et al., 2015	Labrador Trough, Canada	W-063-01	Sokoman iron formation, Primary (early) magnetite in the iron formation	0.0108354		0.323712	23.0485
1.88	Chung et al., 2015	Labrador Trough, Canada	W-063-02	Sokoman iron formation, Primary (early) magnetite in the iron formation	0.00683954		0	17.7502
1.88	Chung et al., 2015	Labrador Trough, Canada	W-063-03	Sokoman iron formation, Primary (early) magnetite in the iron formation	0.00667596		0.391427	17.5458
1.88	Chung et al., 2015	Labrador Trough, Canada	HY-77-11	Sokoman iron formation, Altered magnetite in the iron formation	0.015214		0.458276	35.416
1.88	Chung et al., 2015	Labrador Trough, Canada	HY-127-1	Sokoman iron formation, Altered magnetite in the iron formation	0.00203762		0.324517	29.5277
1.88	Chung et al., 2015	Labrador Trough, Canada	HY-127-2	Sokoman iron formation, Altered magnetite in the iron formation	0.00234838		0.156259	29.1659
1.88	Chung et al., 2015	Labrador Trough, Canada	HY-127-3	Sokoman iron formation, Altered magnetite in the iron formation	0.0026707		0.116881	29.6429
1.88	Chung et al., 2015	Labrador Trough, Canada	HY-130-3	Sokoman iron formation, Altered magnetite in the iron formation	0.0124807		0.0991349	43.3458
1.88	Chung et al., 2015	Labrador Trough, Canada	HY-130-14	Sokoman iron formation, Altered magnetite in the iron formation	0.0110555		0.0753011	41.9688
1.88	Chung et al., 2015	Labrador Trough, Canada	HY-130-13	Sokoman iron formation, Altered magnetite in the iron formation	0.00832856		0.184735	41.9109
1.88	Chung et al., 2015	Labrador Trough, Canada	HY-130-12	Sokoman iron formation, Altered magnetite in the iron formation	0.0120614		0.0705162	46.166
1.88	Chung et al., 2015	Labrador Trough, Canada	HY-130-11	Sokoman iron formation, Altered magnetite in the iron formation	0.0130503		0.473452	40.856
1.88	Chung et al., 2015	Labrador Trough, Canada	HY-130-10	Sokoman iron formation, Altered magnetite in the iron formation	0.010428		0	44.899
1.88	Chung et al., 2015	Labrador Trough, Canada	HY-130-9	Sokoman iron formation, Altered magnetite in the iron formation	0.0120191		0.363653	43.2698
1.88	Chung et al., 2015	Labrador Trough, Canada	HY-130-8	Sokoman iron formation, Altered magnetite in the iron formation	0.0114778		1.00679	38.6218
1.88	Chung et al., 2015	Labrador Trough, Canada	HY-130-7	Sokoman iron formation, Altered magnetite in the iron formation	0.0120337		0.476212	43.6188
1.88	Chung et al., 2015	Labrador Trough, Canada	HY-130-6	Sokoman iron formation, Altered magnetite in the iron formation	0.0156238		0	38.8462
1.88	Chung et al., 2015	Labrador Trough, Canada	W-063-08	Sokoman iron formation, Primary (early) magnetite in the iron formation	0.00678038		0.404319	21.1839
1.88	Chung et al., 2015	Labrador Trough, Canada	HY-130-4	Sokoman iron formation, Altered magnetite in the iron formation	0.0140043		0.393722	43.7398
1.88	Chung et al., 2015	Labrador Trough, Canada	HY-130-2	Sokoman iron formation, Altered magnetite in the iron formation	0.0307872		0.192222	44.7804
1.88	Chung et al., 2015	Labrador Trough, Canada	HY-127-4	Sokoman iron formation, Altered magnetite in the iron formation	0.0970604		0.745287	41.2651
1.88	Chung et al., 2015	Labrador Trough, Canada	HY-130-1	Sokoman iron formation, Altered magnetite in the iron formation	0.0100907		0.324102	44.5248
1.88	Chung et al., 2015	Labrador Trough, Canada	HY-127-14	Sokoman iron formation, Altered magnetite in the iron formation	0.0125486		0.307156	19.3239
1.88	Chung et al., 2015	Labrador Trough, Canada	HY-127-13	Sokoman iron formation, Altered magnetite in the iron formation	0.0199563		0.211304	29.2181
1.88	Chung et al., 2015	Labrador Trough, Canada	HY-127-12	Sokoman iron formation, Altered magnetite in the iron formation	0.0367073		0.320516	36.8449
1.88	Chung et al., 2015	Labrador Trough, Canada	HY-127-11	Sokoman iron formation, Altered magnetite in the iron formation	0.00737278		0.0307403	28.7837
1.88	Chung et al., 2015	Labrador Trough, Canada	HY-127-10	Sokoman iron formation, Altered magnetite in the iron formation	0.00426808		0.0921404	28.4829
1.88	Chung et al., 2015	Labrador Trough, Canada	HY-127-9	Sokoman iron formation, Altered magnetite in the iron formation	0.00367158		0.054105	27.6109
1.88	Chung et al., 2015	Labrador Trough, Canada	HY-127-8	Sokoman iron formation, Altered magnetite in the iron formation	0.00312635		0.178708	29.6676
1.88	Chung et al., 2015	Labrador Trough, Canada	HY-127-7	Sokoman iron formation, Altered magnetite in the iron formation	0.0479899		0.489133	28.9759
1.88	Chung et al., 2015	Labrador Trough, Canada	HY-127-6	Sokoman iron formation, Altered magnetite in the iron formation	0.0175413		0.0965286	29.5943
1.88	Chung et al., 2015	Labrador Trough, Canada	HY-127-5	Sokoman iron formation, Altered magnetite in the iron formation	0.0133703		0.242758	26.5432
1.88	Chung et al., 2015	Labrador Trough, Canada	HY-77-10	Sokoman iron formation, Altered magnetite in the iron formation	0.0174756		0.944191	34.3084
1.88	Chung et al., 2015	Labrador Trough, Canada	HY-77-9	Sokoman iron formation, Altered magnetite in the iron formation	0.0685544		0.595142	37.4455
1.88	Chung et al., 2015	Labrador Trough, Canada	HY-77-8	Sokoman iron formation, Altered magnetite in the iron formation	0.305937		0.808996	40.8938
1.88	Chung et al., 2015	Labrador Trough, Canada	RL-74-10	Sokoman iron formation, Magnetite in volcanic breccia	0.0591794		7.36588	43.1127
1.88	Chung et al., 2015	Labrador Trough, Canada	HY-115-5	Sokoman iron formation, Magnetite in volcanic breccia	17.6982		2.44558	189.306
1.88	Chung et al., 2015	Labrador Trough, Canada	HY-115-4	Sokoman iron formation, Magnetite in volcanic breccia	16.5332		5.34954	274.135
1.88	Chung et al., 2015	Labrador Trough, Canada	HY-115-3	Sokoman iron formation, Magnetite in volcanic breccia	22.9434		10.4526	529.028
1.88	Chung et al., 2015	Labrador Trough, Canada	W-063-04	Sokoman iron formation, Primary (early) magnetite in the iron formation	0.00653586		0.325589	21.6083
1.88	Chung et al., 2015	Labrador Trough, Canada	W-063-05	Sokoman iron formation, Primary (early) magnetite in the iron formation	0.00679649		0.293166	20.022
1.88	Chung et al., 2015	Labrador Trough, Canada	W-063-06	Sokoman iron formation, Primary (early) magnetite in the iron formation	0.00635047		0.329507	20.0281
1.88	Chung et al., 2015	Labrador Trough, Canada	W-063-07	Sokoman iron formation, Primary (early) magnetite in the iron formation	0.00758705		0.128031	19.0973
1.88	Chung et al., 2015	Labrador Trough, Canada	HY-115-2	Sokoman iron formation, Magnetite in volcanic breccia	14.9672		4.30308	384.687
1.88	Chung et al., 2015	Labrador Trough, Canada	HY-115-1	Sokoman iron formation, Magnetite in volcanic breccia	9.42614		3.97915	465.939
1.88	Chung et al., 2015	Labrador Trough, Canada	RL-74-12	Sokoman iron formation, Magnetite in volcanic breccia	0.00841276		0.235678	73.4329
1.88	Chung et al., 2015	Labrador Trough, Canada	RL-74-11	Sokoman iron formation, Magnetite in volcanic breccia	0.013617		0.435505	51.5225
1.88	Chung et al., 2015	Labrador Trough, Canada	RL-74-9	Sokoman iron formation, Magnetite in volcanic breccia	0.0251817		0.525964	36.1372
1.88	Chung et al., 2015	Labrador Trough, Canada	HY-115-7	Sokoman iron formation, Magnetite in volcanic breccia	4.49048		0.397577	299.013
1.88	Chung et al., 2015	Labrador Trough, Canada	RL-74-8	Sokoman iron formation, Magnetite in volcanic breccia	1.89564		5.12196	887.243
1.88	Chung et al., 2015	Labrador Trough, Canada	RL-74-7	Sokoman iron formation, Magnetite in volcanic breccia	1.54154		3.55032	286.461
1.88	Chung et al., 2015	Labrador Trough, Canada	RL-74-6	Sokoman iron formation, Magnetite in volcanic breccia	0.969259		5.474	54.1359
1.88	Chung et al., 2015	Labrador Trough, Canada	RL-74-5	Sokoman iron formation, Magnetite in volcanic breccia	0.0375736		0.335839	45.7629
1.88	Chung et al., 2015	Labrador Trough, Canada	RL-74-4	Sokoman iron formation, Magnetite in volcanic breccia	0.0284666		0.517294	49.1908
1.88	Chung et al., 2015	Labrador Trough, Canada	RL-74-3	Sokoman iron formation, Magnetite in volcanic breccia	0.0102877		0.680032	60.0165
1.88	Chung et al., 2015	Labrador Trough, Canada	RL-74-2	Sokoman iron formation, Magnetite in volcanic breccia	1.58201		2.40642	130.978
1.88	Chung et al., 2015	Labrador Trough, Canada	RL-74-1	Sokoman iron formation, Magnetite in volcanic breccia	0.0787978		0.510541	353.985
1.88	Chung et al., 2015	Labrador Trough, Canada	W-063-12	Sokoman iron formation, Primary (early) magnetite in the iron formation	0.00786313		0.422049	20.9173
1.88	Chung et al., 2015	Labrador Trough, Canada	W-063-11	Sokoman iron formation, Primary (early) magnetite in the iron formation	0.00638387		0.260042	17.1974
1.88	Chung et al., 2015	Labrador Trough, Canada	W-063-10	Sokoman iron formation, Primary (early) magnetite in the iron formation	0.0102586		0.192767	23.4038
1.88	Chung et al., 2015	Labrador Trough, Canada	HY-115-6	Sokoman iron formation, Magnetite in volcanic breccia	19.2699		2.0134	111.249
1.88	Chung et al., 2015	Labrador Trough, Canada	HY-115-8	Sokoman iron formation, Magnetite in volcanic breccia	1.33161		0.800585	135.342
1.88	Chung et al., 2015	Labrador Trough, Canada	HY-77-7	Sokoman iron formation, Altered magnetite in the iron formation	0.17772		1.52397	37.4146
1.88	Chung et al., 2015	Labrador Trough, Canada	HY-62-9	Sokoman iron formation, Altered magnetite in the iron formation	0.0191789		0.235417	39.9527
1.88	Chung et al., 2015	Labrador Trough, Canada	HY-77-6	Sokoman iron formation, Altered magnetite in the iron formation	0.00778082		0.200882	38.5828
1.88	Chung et al., 2015	Labrador Trough, Canada	HY-77-5	Sokoman iron formation, Altered magnetite in the iron formation	0.146455		1.25674	36.1777
1.88	Chung et al., 2015	Labrador Trough, Canada	HY-77-4	Sokoman iron formation, Altered magnetite in the iron formation	0.0994066		1.1003	27.5483
1.88	Chung et al., 2015	Labrador Trough, Canada	HY-77-3	Sokoman iron formation, Altered magnetite in the iron formation	0.166176		2.47547	32.053
1.88	Chung et al., 2015	Labrador Trough, Canada	HY-77-2	Sokoman iron formation, Altered magnetite in the iron formation	0.139616		2.20589	42.6061
1.88	Chung et al., 2015	Labrador Trough, Canada	HY-77-1	Sokoman iron formation, Altered magnetite in the iron formation	0.209887		1.7622	41.4365
1.88	Chung et al., 2015	Labrador Trough, Canada	HY-62-14	Sokoman iron formation, Altered magnetite in the iron formation	0.0141844		2.07157	53.0146
1.88	Chung et al., 2015	Labrador Trough, Canada	HY-62-13	Sokoman iron formation, Altered magnetite in the iron formation	0.00710208		0.0524287	43.7815
1.88	Chung et al., 2015	Labrador Trough, Canada	HY-62-12	Sokoman iron formation, Altered magnetite in the iron formation	0.0220705		0.182682	55.2521
1.88	Chung et al., 2015	Labrador Trough, Canada	HY-62-11	Sokoman iron formation, Altered magnetite in the iron formation	0.0292378		0.212584	43.2719
1.88	Chung et al., 2015	Labrador Trough, Canada	HY-62-10	Sokoman iron formation, Altered magnetite in the iron formation	0.0417438		0.226793	47.6121
1.88	Chung et al., 2015	Labrador Trough, Canada	HY-62-8	Sokoman iron formation, Altered magnetite in the iron formation	0.0324062		0.378992	34.1456
1.88	Chung et al., 2015	Labrador Trough, Canada	HY-115-9	Sokoman iron formation, Magnetite in volcanic breccia	5.10372		2.21617	393.114
1.88	Chung et al., 2015	Labrador Trough, Canada	HY-62-7	Sokoman iron formation, Altered magnetite in the iron formation	0.0137856		0.281823	42.2083
1.88	Chung et al., 2015	Labrador Trough, Canada	HY-62-6	Sokoman iron formation, Altered magnetite in the iron formation	0.018676		0.371316	44.9952
1.88	Chung et al., 2015	Labrador Trough, Canada	HY-62-5	Sokoman iron formation, Altered magnetite in the iron formation	0.0128731		0.268298	34.1119
1.88	Chung et al., 2015	Labrador Trough, Canada	HY-62-4	Sokoman iron formation, Altered magnetite in the iron formation	0.0158314		0.485829	36.3378
1.88	Chung et al., 2015	Labrador Trough, Canada	HY-62-3	Sokoman iron formation, Altered magnetite in the iron formation	0.0175719		0.722233	31.9183
1.88	Chung et al., 2015	Labrador Trough, Canada	HY-62-2	Sokoman iron formation, Altered magnetite in the iron formation	0.0331835		0.263997	38.0101
1.88	Chung et al., 2015	Labrador Trough, Canada	HY-62-1	Sokoman iron formation, Altered magnetite in the iron formation	0.0159271		0.619353	40.8567
1.88	Chung et al., 2015	Labrador Trough, Canada	HY-115-14	Sokoman iron formation, Magnetite in volcanic breccia	13.5828		9.69189	193.277
1.88	Chung et al., 2015	Labrador Trough, Canada	HY-115-13	Sokoman iron formation, Magnetite in volcanic breccia	9.36338		2.10657	77.7175
1.88	Chung et al., 2015	Labrador Trough, Canada	HY-115-12	Sokoman iron formation, Magnetite in volcanic breccia	1.74467		6.73416	88.3168
1.88	Chung et al., 2015	Labrador Trough, Canada	HY-115-11	Sokoman iron formation, Magnetite in volcanic breccia	4.10315		1.11443	82.9854
1.88	Chung et al., 2015	Labrador Trough, Canada	HY-130-15	Sokoman iron formation, Altered magnetite in the iron formation	0.0105155		0.51202	42.9715
1.88	Chung et al., 2015	Labrador Trough, Canada	HY-130-5	Sokoman iron formation, Altered magnetite in the iron formation	0.0173864		0.075797	42.3908
1.88	Chung et al., 2015	Labrador Trough, Canada	HY-176-2	Sokoman iron formation, Altered magnetite in the iron formation	0.028089		1.47367	35.3423
1.88	Chung et al., 2015	Labrador Trough, Canada	RL-214-10	Sokoman iron formation, Altered magnetite in the iron formation	0.00118372		0.17915	9.77681
1.88	Chung et al., 2015	Labrador Trough, Canada	RL-246-5	Sokoman iron formation, Altered magnetite in the iron formation	0.00463979		2.11035	4.8846
1.88	Chung et al., 2015	Labrador Trough, Canada	RL-246-4	Sokoman iron formation, Altered magnetite in the iron formation	0.00361279		1.14365	5.70611
1.88	Chung et al., 2015	Labrador Trough, Canada	RL-246-3	Sokoman iron formation, Altered magnetite in the iron formation	0.00171162		0.341018	10.602
1.88	Chung et al., 2015	Labrador Trough, Canada	RL-246-2	Sokoman iron formation, Altered magnetite in the iron formation	0.00711489		0.39763	8.6301
1.88	Chung et al., 2015	Labrador Trough, Canada	RL-246-1	Sokoman iron formation, Altered magnetite in the iron formation	0.109606		0.178516	6.48497
1.88	Chung et al., 2015	Labrador Trough, Canada	RL-214-14	Sokoman iron formation, Altered magnetite in the iron formation	0.0130561		0.103558	48.932
1.88	Chung et al., 2015	Labrador Trough, Canada	RL-214-13	Sokoman iron formation, Altered magnetite in the iron formation	0.0150846		0.140877	73.6172
1.88	Chung et al., 2015	Labrador Trough, Canada	RL-214-12	Sokoman iron formation, Altered magnetite in the iron formation	0.00615761		0.0409889	39.025
1.88	Chung et al., 2015	Labrador Trough, Canada	RL-214-11	Sokoman iron formation, Altered magnetite in the iron formation	0.00755573		0.128144	16.7435
1.88	Chung et al., 2015	Labrador Trough, Canada	RL-214-9	Sokoman iron formation, Altered magnetite in the iron formation	0.0121026		0.0550572	21.6676
1.88	Chung et al., 2015	Labrador Trough, Canada	RL-246-7	Sokoman iron formation, Altered magnetite in the iron formation	0.0010576		0.333226	10.1762
1.88	Chung et al., 2015	Labrador Trough, Canada	RL-214-8	Sokoman iron formation, Altered magnetite in the iron formation	0.00956126		0.168051	23.3937
1.88	Chung et al., 2015	Labrador Trough, Canada	RL-214-7	Sokoman iron formation, Altered magnetite in the iron formation	0.00694194		0.019039	33.3262
1.88	Chung et al., 2015	Labrador Trough, Canada	RL-214-6	Sokoman iron formation, Altered magnetite in the iron formation	0.00534796		0.0390738	19.0027
1.88	Chung et al., 2015	Labrador Trough, Canada	HY-176-3	Sokoman iron formation, Altered magnetite in the iron formation	0.0289634		1.2331	45.1311
1.88	Chung et al., 2015	Labrador Trough, Canada	RL-214-5	Sokoman iron formation, Altered magnetite in the iron formation	0.00824924		0.122866	20.6605
1.88	Chung et al., 2015	Labrador Trough, Canada	RL-214-4	Sokoman iron formation, Altered magnetite in the iron formation	0.00856201		0.0919951	14.7057
1.88	Chung et al., 2015	Labrador Trough, Canada	RL-214-3	Sokoman iron formation, Altered magnetite in the iron formation	0.0051312		0.108856	15.8145
1.88	Chung et al., 2015	Labrador Trough, Canada	RL-214-2	Sokoman iron formation, Altered magnetite in the iron formation	0.00675358		0.0816949	22.4235
1.88	Chung et al., 2015	Labrador Trough, Canada	RL-214-1	Sokoman iron formation, Altered magnetite in the iron formation	0.00598802		0	20.1543
1.88	Chung et al., 2015	Labrador Trough, Canada	RL-246-6	Sokoman iron formation, Altered magnetite in the iron formation	0.00159144		0.243977	14.4196
1.88	Chung et al., 2015	Labrador Trough, Canada	RL-246-8	Sokoman iron formation, Altered magnetite in the iron formation	0.00672057		0.817808	3.51263
1.88	Chung et al., 2015	Labrador Trough, Canada	RL-205-14	Sokoman iron formation, Altered magnetite in the iron formation	0.00336188		0.537528	4.91788
1.88	Chung et al., 2015	Labrador Trough, Canada	W-060-06	Sokoman iron formation, Altered magnetite in the iron formation	0.00784789		0.150618	4.61471
1.88	Chung et al., 2015	Labrador Trough, Canada	W-060-15	Sokoman iron formation, Altered magnetite in the iron formation	0.00210629		0.21766	5.19731
1.88	Chung et al., 2015	Labrador Trough, Canada	W-060-14	Sokoman iron formation, Altered magnetite in the iron formation	0.00484172		0.194741	8.09604
1.88	Chung et al., 2015	Labrador Trough, Canada	W-060-13	Sokoman iron formation, Altered magnetite in the iron formation	0.00505985		0.243494	2.22577
1.88	Chung et al., 2015	Labrador Trough, Canada	W-060-12	Sokoman iron formation, Altered magnetite in the iron formation	0.0082747		0.350038	4.08235
1.88	Chung et al., 2015	Labrador Trough, Canada	W-060-11	Sokoman iron formation, Altered magnetite in the iron formation	0.0456583		0.179086	62.8451
1.88	Chung et al., 2015	Labrador Trough, Canada	W-060-10	Sokoman iron formation, Altered magnetite in the iron formation	0.00432904		0.593928	57.1211
1.88	Chung et al., 2015	Labrador Trough, Canada	W-060-09	Sokoman iron formation, Altered magnetite in the iron formation	0.119944		0.405185	72.3136
1.88	Chung et al., 2015	Labrador Trough, Canada	W-060-08	Sokoman iron formation, Altered magnetite in the iron formation	0.0331006		0.523105	64.7657
1.88	Chung et al., 2015	Labrador Trough, Canada	W-060-07	Sokoman iron formation, Altered magnetite in the iron formation	0.0178734		0.132472	0
1.88	Chung et al., 2015	Labrador Trough, Canada	W-060-05	Sokoman iron formation, Altered magnetite in the iron formation	0.00893093		0.226398	6.51641
1.88	Chung et al., 2015	Labrador Trough, Canada	RL-246-9	Sokoman iron formation, Altered magnetite in the iron formation	0.00659		0.444823	11.6502
1.88	Chung et al., 2015	Labrador Trough, Canada	W-060-04	Sokoman iron formation, Altered magnetite in the iron formation	0.00884804		0.397051	4.52292
1.88	Chung et al., 2015	Labrador Trough, Canada	W-060-03	Sokoman iron formation, Altered magnetite in the iron formation	0.00777393		0.0646546	8.34659
1.88	Chung et al., 2015	Labrador Trough, Canada	W-060-02	Sokoman iron formation, Altered magnetite in the iron formation	0.00738504		0.167816	10.4194
1.88	Chung et al., 2015	Labrador Trough, Canada	W-060-01	Sokoman iron formation, Altered magnetite in the iron formation	0.0145738		2.74566	4.02348
1.88	Chung et al., 2015	Labrador Trough, Canada	RL-246-14	Sokoman iron formation, Altered magnetite in the iron formation	0.00320013		0.447709	7.91651
1.88	Chung et al., 2015	Labrador Trough, Canada	RL-246-13	Sokoman iron formation, Altered magnetite in the iron formation	0.00136494		0.578269	3.85022
1.88	Chung et al., 2015	Labrador Trough, Canada	RL-246-12	Sokoman iron formation, Altered magnetite in the iron formation	0.00160645		0.416222	11.2936
1.88	Chung et al., 2015	Labrador Trough, Canada	RL-246-11	Sokoman iron formation, Altered magnetite in the iron formation	0.00549648		0.562238	8.59731
1.88	Chung et al., 2015	Labrador Trough, Canada	RL-246-10	Sokoman iron formation, Altered magnetite in the iron formation	0.00660035		0.195585	8.10562
1.88	Chung et al., 2015	Labrador Trough, Canada	RL-205-15	Sokoman iron formation, Altered magnetite in the iron formation	0.00265186		0.433938	4.38726
1.88	Chung et al., 2015	Labrador Trough, Canada	W-063-09	Sokoman iron formation, Primary (early) magnetite in the iron formation	0.00723057		0.200429	19.6235
1.88	Chung et al., 2015	Labrador Trough, Canada	RL-205-13	Sokoman iron formation, Altered magnetite in the iron formation	0.00241123		0.662429	4.30791
1.88	Chung et al., 2015	Labrador Trough, Canada	RL-125-12	Sokoman iron formation, Altered magnetite in the iron formation	0.0179204		2.05421	12.8772
1.88	Chung et al., 2015	Labrador Trough, Canada	RL-167-13	Sokoman iron formation, Altered magnetite in the iron formation	0.00171923		0.62777	49.4773
1.88	Chung et al., 2015	Labrador Trough, Canada	RL-167-12	Sokoman iron formation, Altered magnetite in the iron formation	0.00278261		0.543766	45.7462
1.88	Chung et al., 2015	Labrador Trough, Canada	RL-167-11	Sokoman iron formation, Altered magnetite in the iron formation	0.00178197		0.809769	46.7594
1.88	Chung et al., 2015	Labrador Trough, Canada	RL-167-10	Sokoman iron formation, Altered magnetite in the iron formation	0.00211519		0.938624	41.0669
1.88	Chung et al., 2015	Labrador Trough, Canada	RL-167-9	Sokoman iron formation, Altered magnetite in the iron formation	0.00144796		1.23724	43.1044
1.88	Chung et al., 2015	Labrador Trough, Canada	RL-167-8	Sokoman iron formation, Altered magnetite in the iron formation	0.00174887		0.94318	47.7465
1.88	Chung et al., 2015	Labrador Trough, Canada	RL-167-7	Sokoman iron formation, Altered magnetite in the iron formation	0.00102554		0.400598	42.0444
1.88	Chung et al., 2015	Labrador Trough, Canada	RL-205-12	Sokoman iron formation, Altered magnetite in the iron formation	0.00406719		0.448292	11.7422
1.88	Chung et al., 2015	Labrador Trough, Canada	RL-167-4	Sokoman iron formation, Altered magnetite in the iron formation	0.000328565		0.81468	49.9458
1.88	Chung et al., 2015	Labrador Trough, Canada	RL-167-3	Sokoman iron formation, Altered magnetite in the iron formation	0.00168763		0.522675	47.6281
1.88	Chung et al., 2015	Labrador Trough, Canada	RL-167-2	Sokoman iron formation, Altered magnetite in the iron formation	0.000609392		0.709656	47.1434
1.88	Chung et al., 2015	Labrador Trough, Canada	RL-167-1	Sokoman iron formation, Altered magnetite in the iron formation	0.00115051		0.410681	48.0032
1.88	Chung et al., 2015	Labrador Trough, Canada	RL-125-14	Sokoman iron formation, Altered magnetite in the iron formation	0.0119157		0.758266	14.7531
1.88	Chung et al., 2015	Labrador Trough, Canada	RL-125-13	Sokoman iron formation, Altered magnetite in the iron formation	0.00519151		0.0767249	23.1609
1.88	Chung et al., 2015	Labrador Trough, Canada	RL-125-11	Sokoman iron formation, Altered magnetite in the iron formation	0.00967057		0.535064	13.8185
1.88	Chung et al., 2015	Labrador Trough, Canada	RL-205-1	Sokoman iron formation, Altered magnetite in the iron formation	0.0031347		0.190872	12.1211
1.88	Chung et al., 2015	Labrador Trough, Canada	RL-125-10	Sokoman iron formation, Altered magnetite in the iron formation	0.0105627		0.591776	22.7522
1.88	Chung et al., 2015	Labrador Trough, Canada	RL-125-9	Sokoman iron formation, Altered magnetite in the iron formation	0.0091867		1.1414	16.8285
1.88	Chung et al., 2015	Labrador Trough, Canada	RL-125-8	Sokoman iron formation, Altered magnetite in the iron formation	0.009148		0.254496	16.3734
1.88	Chung et al., 2015	Labrador Trough, Canada	RL-125-7	Sokoman iron formation, Altered magnetite in the iron formation	0.0103201		4.36711	2.3557
1.88	Chung et al., 2015	Labrador Trough, Canada	RL-125-6	Sokoman iron formation, Altered magnetite in the iron formation	0.00938495		4.34351	6.17374
1.88	Chung et al., 2015	Labrador Trough, Canada	RL-125-5	Sokoman iron formation, Altered magnetite in the iron formation	0.0104555		1.68709	23.7181
1.88	Chung et al., 2015	Labrador Trough, Canada	RL-125-4	Sokoman iron formation, Altered magnetite in the iron formation	0.00450992		0	13.9894
1.88	Chung et al., 2015	Labrador Trough, Canada	RL-125-3	Sokoman iron formation, Altered magnetite in the iron formation	0.00466139		0	12.1445
1.88	Chung et al., 2015	Labrador Trough, Canada	RL-125-2	Sokoman iron formation, Altered magnetite in the iron formation	0.00475168		0.0239481	12.9622
1.88	Chung et al., 2015	Labrador Trough, Canada	RL-125-1	Sokoman iron formation, Altered magnetite in the iron formation	0.00520632		0	13.5619
1.88	Chung et al., 2015	Labrador Trough, Canada	HY-176-12	Sokoman iron formation, Altered magnetite in the iron formation	0.177115		0.733092	30.1867
1.88	Chung et al., 2015	Labrador Trough, Canada	HY-176-11	Sokoman iron formation, Altered magnetite in the iron formation	0.139957		2.24745	35.5113
1.88	Chung et al., 2015	Labrador Trough, Canada	HY-176-6	Sokoman iron formation, Altered magnetite in the iron formation	0.0200769		0.380942	32.1677
1.88	Chung et al., 2015	Labrador Trough, Canada	HY-176-4	Sokoman iron formation, Altered magnetite in the iron formation	0.0199069		0.979161	39.3164
1.88	Chung et al., 2015	Labrador Trough, Canada	RL-167-14	Sokoman iron formation, Altered magnetite in the iron formation	0.00344825		0.370376	44.097
1.88	Chung et al., 2015	Labrador Trough, Canada	RL-167-5	Sokoman iron formation, Altered magnetite in the iron formation	0.00192355		1.30866	63.273
1.88	Chung et al., 2015	Labrador Trough, Canada	RL-205-10	Sokoman iron formation, Altered magnetite in the iron formation	0.0031139		0.49416	7.08595
1.88	Chung et al., 2015	Labrador Trough, Canada	RL-205-9	Sokoman iron formation, Altered magnetite in the iron formation	0.00486155		0.432246	12.7965
1.88	Chung et al., 2015	Labrador Trough, Canada	RL-205-8	Sokoman iron formation, Altered magnetite in the iron formation	0.00511576		0.179361	11.7353
1.88	Chung et al., 2015	Labrador Trough, Canada	RL-205-2	Sokoman iron formation, Altered magnetite in the iron formation	0.00227557		0.61687	5.19889
1.88	Chung et al., 2015	Labrador Trough, Canada	RL-205-3	Sokoman iron formation, Altered magnetite in the iron formation	0.0058608		0.445568	16.2682
1.88	Chung et al., 2015	Labrador Trough, Canada	RL-205-4	Sokoman iron formation, Altered magnetite in the iron formation	0.00260734		0.117616	16.9944
1.88	Chung et al., 2015	Labrador Trough, Canada	RL-205-11	Sokoman iron formation, Altered magnetite in the iron formation	0.00389144		0.754625	9.24165
1.88	Chung et al., 2015	Labrador Trough, Canada	RL-205-5	Sokoman iron formation, Altered magnetite in the iron formation	0.00377883		0.555861	8.67513
1.88	Chung et al., 2015	Labrador Trough, Canada	RL-205-6	Sokoman iron formation, Altered magnetite in the iron formation	0.00260675		0.33643	4.22761
1.88	Chung et al., 2015	Labrador Trough, Canada	RL-205-7	Sokoman iron formation, Altered magnetite in the iron formation	0.00380797		0.310735	10.581
1.8	Braga et al., 2021	eastern margin of the S˜ao Francisco Craton, Brazil	B-S46	Iron ore deposits, Orosirian to early Statherian, youngest 1.67 Ga	0.02		0.5	66
1.8	Braga et al., 2021	eastern margin of the S˜ao Francisco Craton, Brazil	B-S42	Iron ore deposits, Orosirian to early Statherian, youngest 1.67 Ga	0.02		1	71
1.8	Braga et al., 2021	eastern margin of the S˜ao Francisco Craton, Brazil	B-S31	Iron ore deposits, Orosirian to early Statherian, youngest 1.67 Ga	0.03		0.5	99
1.8	Braga et al., 2021	eastern margin of the S˜ao Francisco Craton, Brazil	B-S40	Iron ore deposits, Orosirian to early Statherian, youngest 1.67 Ga	0.09		0.6	<8
1.8	Braga et al., 2021	eastern margin of the S˜ao Francisco Craton, Brazil	B-S44	Iron ore deposits, Orosirian to early Statherian, youngest 1.67 Ga	<0.01		0.7	22
1.8	Braga et al., 2021	eastern margin of the S˜ao Francisco Craton, Brazil	B-S34	Iron ore deposits, Orosirian to early Statherian, youngest 1.67 Ga	0.03		0.5	37
1.8	Braga et al., 2021	eastern margin of the S˜ao Francisco Craton, Brazil	B-S48	Iron ore deposits, Orosirian to early Statherian, youngest 1.67 Ga	0.05		0.6	47
1.8	Braga et al., 2021	eastern margin of the S˜ao Francisco Craton, Brazil	B-R28	Iron ore deposits, Orosirian to early Statherian, youngest 1.67 Ga	<0.01		0.8	<8
1.8	Braga et al., 2021	eastern margin of the S˜ao Francisco Craton, Brazil	B-S47	Iron ore deposits, Orosirian to early Statherian, youngest 1.67 Ga	0.04		0.4	47
1.8	Braga et al., 2021	eastern margin of the S˜ao Francisco Craton, Brazil	C-R03	Iron ore deposits, Orosirian to early Statherian, youngest 1.67 Ga	0.01		0.8	30
1.8	Braga et al., 2021	eastern margin of the S˜ao Francisco Craton, Brazil	B-S27	Iron ore deposits, Orosirian to early Statherian, youngest 1.67 Ga	0.11		0.7	45
1.8	Braga et al., 2021	eastern margin of the S˜ao Francisco Craton, Brazil	B-S28	Iron ore deposits, Orosirian to early Statherian, youngest 1.67 Ga	0.16		0.2	135
1.8	Braga et al., 2021	eastern margin of the S˜ao Francisco Craton, Brazil	B-R27	Iron ore deposits, Orosirian to early Statherian, youngest 1.67 Ga	0.07		0.4	62
1.8	Braga et al., 2021	eastern margin of the S˜ao Francisco Craton, Brazil	C-R04	Iron ore deposits, Orosirian to early Statherian, youngest 1.67 Ga	<0.01		3.8	43
1.8	Braga et al., 2021	eastern margin of the S˜ao Francisco Craton, Brazil	B-S11	Iron ore deposits, Orosirian to early Statherian, youngest 1.67 Ga	0.13		0.2	35
1.8	Braga et al., 2021	eastern margin of the S˜ao Francisco Craton, Brazil	B-R31	Iron ore deposits, Orosirian to early Statherian, youngest 1.67 Ga	0.08		0.5	8
1.8	Braga et al., 2021	eastern margin of the S˜ao Francisco Craton, Brazil	B-R26	Iron ore deposits, Orosirian to early Statherian, youngest 1.67 Ga	0.04		0.4	105
1.72	Slack et al., 2009	Pecos greenstone belt, N.Mexico - seafloor hydrothermal Si-Fe-Mn exhalites	JS-06-39H	Mgt layer	0.028	90.43	<2	39
1.72	Slack et al., 2009	Pecos greenstone belt, N.Mexico - seafloor hydrothermal Si-Fe-Mn exhalites	JS-06-39I	Qtz-Mgt IF	0.018	59.97	<2	15
1.72	Slack et al., 2009	Pecos greenstone belt, N.Mexico - seafloor hydrothermal Si-Fe-Mn exhalites	JS-06-38A	Qtz Mgt IF	0.056	53.2	<2	22
1.68	Hatton and Davidson, 2004	Weatherly Creek IF, Soldier Cap Group, Australia	WC27	transitional iron formation	0.02	6.83		22
1.68	Hatton and Davidson, 2004	Weatherly Creek IF, Soldier Cap Group, Australia	WC-78	garnet quartzite	0.07	4.08		127
1.68	Hatton and Davidson, 2004	Weatherly Creek IF, Soldier Cap Group, Australia	WC97	garnet quartzite	0.06	0.64		358
1.68	Hatton and Davidson, 2004	Weatherly Creek IF, Soldier Cap Group, Australia	WC92	iron formation	0.11	5.37		588
1.68	Hatton and Davidson, 2004	Weatherly Creek IF, Soldier Cap Group, Australia	WC91	iron formation	0.03	4.93		480
1.68	Hatton and Davidson, 2004	Weatherly Creek IF, Soldier Cap Group, Australia	WC89	iron formation	0.02	5.64		566
1.68	Hatton and Davidson, 2004	Weatherly Creek IF, Soldier Cap Group, Australia	WC81	iron formation	0.02	6.97		90
1.68	Hatton and Davidson, 2004	Weatherly Creek IF, Soldier Cap Group, Australia	WC99	transitional iron formation	0.06	3.66		74
1.68	Hatton and Davidson, 2004	Weatherly Creek IF, Soldier Cap Group, Australia	WC98	transitional iron formation	0.4	4.63		163
1.68	Hatton and Davidson, 2004	Weatherly Creek IF, Soldier Cap Group, Australia	WC29	transitional iron formation	0.03	9.19		630
1.68	Hatton and Davidson, 2004	Weatherly Creek IF, Soldier Cap Group, Australia	WC86	transitional iron formation	0.03	3.22		105
1.68	Hatton and Davidson, 2004	Weatherly Creek IF, Soldier Cap Group, Australia	WC28	transitional iron formation	0.02	8.1		49
1.68	Hatton and Davidson, 2004	Weatherly Creek IF, Soldier Cap Group, Australia	WC95	transitional iron formation	0.24	4.77		295
0.9	Sun et al., 2018	Shilu iron ore, Hainan Island, China	SLBY-10–56	Fe ore	0.14	55.71		16.3
0.9	Sun et al., 2018	Shilu iron ore, Hainan Island, China	SLBY-10–61	Fe ore	0.36	77.84		45.9
0.9	Sun et al., 2018	Shilu iron ore, Hainan Island, China	SLBY−10–4-3	Fe ore	0.014	86.79		1.82
0.9	Sun et al., 2018	Shilu iron ore, Hainan Island, China	SLBY-10–75	Fe ore	0.049	93.6		12.4
0.9	Sun et al., 2018	Shilu iron ore, Hainan Island, China	SLBY-10–68	Fe ore	0.041	97.25		6.65
0.9	Sun et al., 2018	Shilu iron ore, Hainan Island, China	SLBY-10–53	Fe ore	<0.01	93.96		1.29
0.9	Sun et al., 2018	Shilu iron ore, Hainan Island, China	SLBY−10–32	Fe ore	0.013	96.54		1.21
0.9	Sun et al., 2018	Shilu iron ore, Hainan Island, China	SLBY−10–10	Fe ore	0.023	86.82		2.09
0.9	Sun et al., 2018	Shilu iron ore, Hainan Island, China	SLBY-10–70	Fe ore	0.043	96.28		9.9
0.9	Sun et al., 2018	Shilu iron ore, Hainan Island, China	SLBY−10–8	Jasperite	0.012	28.94		0.98
0.9	Sun et al., 2018	Shilu iron ore, Hainan Island, China	SLBY−10–25	Fe ore	0.43	28.71		20.1
0.775	EI-Shazly et al., 2019	Egyptian Eastern Desert	GS-4	Gebel Semna	0.2	52.24		107
0.775	EI-Shazly et al., 2019	Egyptian Eastern Desert	N-58	Um Nar	0.09	72.46		51
0.775	EI-Shazly et al., 2019	Egyptian Eastern Desert	IM-22	El Imra	0.03	32.04		115
0.775	EI-Shazly et al., 2019	Egyptian Eastern Desert	IM-27	El Imra	0.06	47.68		94
0.775	EI-Shazly et al., 2019	Egyptian Eastern Desert	H-3	Gebel Hadid	0.03	84.16		64
0.775	EI-Shazly et al., 2019	Egyptian Eastern Desert	H-12	Gebel Hadid	0.06	72.02		57
0.775	EI-Shazly et al., 2019	Egyptian Eastern Desert	H12a	Gebel Hadid	0.03	39.11		32
0.775	EI-Shazly et al., 2019	Egyptian Eastern Desert	H-14a	Gebel Hadid	0.42	29.62		52
0.775	EI-Shazly et al., 2019	Egyptian Eastern Desert	H-21	Gebel Hadid	0.07	38.85		82
0.775	EI-Shazly et al., 2019	Egyptian Eastern Desert	H-26	Gebel Hadid	0.27	42.12		91
0.775	EI-Shazly et al., 2019	Egyptian Eastern Desert	H-37	Gebel Hadid	0.1	71.41		56
0.775	EI-Shazly et al., 2019	Egyptian Eastern Desert	GH-3	Um Ghamis	1.58	49.172		29
0.775	EI-Shazly et al., 2019	Egyptian Eastern Desert	GH-25	Um Ghamis	3.81	49.96		65
0.775	EI-Shazly et al., 2019	Egyptian Eastern Desert	GH-22	Um Ghamis	0.23	59.96		68.7
0.775	EI-Shazly et al., 2019	Egyptian Eastern Desert	GH-31	Um Ghamis	3	64.272		87
0.775	EI-Shazly et al., 2019	Egyptian Eastern Desert	GH-32	Um Ghamis	0.19	56.59		63
0.775	EI-Shazly et al., 2019	Egyptian Eastern Desert	DB-108	Wadi El Dabbah	0.15	61.97		49
0.775	EI-Shazly et al., 2019	Egyptian Eastern Desert	DB-141	Wadi El Dabbah	0.47	33.76		69
0.775	EI-Shazly et al., 2019	Egyptian Eastern Desert	DB-115	Wadi El Dabbah	0.17	47.87		64
0.775	EI-Shazly et al., 2019	Egyptian Eastern Desert	DB-146	Wadi El Dabbah	0.35	39.62		76
0.775	EI-Shazly et al., 2019	Egyptian Eastern Desert	DB-155	Wadi El Dabbah	0.16	73.31		77
0.775	EI-Shazly et al., 2019	Egyptian Eastern Desert	D12-10	Wadi El Dabbah	0.11	39.6		60
0.775	EI-Shazly et al., 2019	Egyptian Eastern Desert	D13-17b	Wadi El Dabbah	0.22	48.88		86
0.775	EI-Shazly et al., 2019	Egyptian Eastern Desert	K-1	Wadi Kareim	0.27	48.59		49.8
0.775	EI-Shazly et al., 2019	Egyptian Eastern Desert	N-53	Um Nar	0.11	50.18		53
0.775	EI-Shazly et al., 2019	Egyptian Eastern Desert	GS-3	Gebel Semna	0.01	67.72		27
0.775	EI-Shazly et al., 2019	Egyptian Eastern Desert	N-23	Um Nar	0.08	39.04		35
0.775	EI-Shazly et al., 2019	Egyptian Eastern Desert	GS17-3	Gebel Semna	0.47	35.39		22.9
0.775	EI-Shazly et al., 2019	Egyptian Eastern Desert	GS-5	Gebel Semna	0.15	63.45		111
0.775	EI-Shazly et al., 2019	Egyptian Eastern Desert	K-24	Gebel Semna	0.1	41.08		36
0.775	EI-Shazly et al., 2019	Egyptian Eastern Desert	K-22	Gebel Semna	0.07	33.16		20
0.775	EI-Shazly et al., 2019	Egyptian Eastern Desert	K19	Gebel Semna	0.12	64.11		59
0.775	EI-Shazly et al., 2019	Egyptian Eastern Desert	K-16	Gebel Semna	0.08	37.93		14.2
0.775	EI-Shazly et al., 2019	Egyptian Eastern Desert	K-11	Gebel Semna	0.08	70.03		59
0.775	EI-Shazly et al., 2019	Egyptian Eastern Desert	K-8	Wadi Kareim	0.04	30.74		70
0.775	EI-Shazly et al., 2019	Egyptian Eastern Desert	GS-16	Gebel Semna	0.01	44.87		161
0.775	EI-Shazly et al., 2019	Egyptian Eastern Desert	GS17-1	Gebel Semna	0.43	23.77		14.7
0.775	EI-Shazly et al., 2019	Egyptian Eastern Desert	GS17-2	Gebel Semna	0.15	34.95		16.9
0.775	EI-Shazly et al., 2019	Egyptian Eastern Desert	GS17-4	Gebel Semna	0.12	34.56		16.1
0.775	EI-Shazly et al., 2019	Egyptian Eastern Desert	N-20	Um Nar	0.09	74.66		46
0.775	EI-Shazly et al., 2019	Egyptian Eastern Desert	MW-10	Abu Marwat	0.06	59.24		63
0.775	EI-Shazly et al., 2019	Egyptian Eastern Desert	MW-21	Abu Marwat	0.07	73.06		58
0.775	EI-Shazly et al., 2019	Egyptian Eastern Desert	MW-11	Abu Marwat	0.08	63.3		33
0.775	EI-Shazly et al., 2019	Egyptian Eastern Desert	MW-16	Abu Marwat	0.08	65.6		38
0.775	EI-Shazly et al., 2019	Egyptian Eastern Desert	K-7	Wadi Kareim	0.1	63.92		31
0.775	EI-Shazly et al., 2019	Egyptian Eastern Desert	N-9	Um Nar	0.03	27.23		72
0.775	EI-Shazly et al., 2019	Egyptian Eastern Desert	N-10	Um Nar	0.17	54.8		78
0.775	EI-Shazly et al., 2019	Egyptian Eastern Desert	N-16	Um Nar	0.05	49.91		64
0.775	EI-Shazly et al., 2019	Egyptian Eastern Desert	N-25	Um Nar	0.03	75.81		59
0.775	EI-Shazly et al., 2019	Egyptian Eastern Desert	N-18	Um Nar	0.11	66.04		35
0.775	EI-Shazly et al., 2019	Egyptian Eastern Desert	N-28	Um Nar	0.09	65.51		59
0.775	EI-Shazly et al., 2019	Egyptian Eastern Desert	K-4	Wadi Kareim	0.07	45.62		44
0.775	EI-Shazly et al., 2019	Egyptian Eastern Desert	K-6	Wadi Kareim	0.15	70.5		66
0.771	Young, 2002	Mineral Fork Formation, Utah	20-22	Mudstone approaching iron formation composition	1.13			146
0.771	Young, 2002	Mineral Fork Formation, Utah	91-45	Mudstone approaching iron formation composition	0.96			142
0.771	Young, 2002	Mineral Fork Formation, Utah	20-21	Mudstone approaching iron formation composition	0.91			129
0.771	Young, 2002	Mineral Fork Formation, Utah	91-31	Mudstone approaching iron formation composition	0.97			122
0.771	Young, 2002	Mineral Fork Formation, Utah	20-15	Mudstone approaching iron formation composition	0.76			92
0.771	Young, 2002	Mineral Fork Formation, Utah	91-36	Mudstone approaching iron formation composition	0.95			85
0.771	Young, 2002	Mineral Fork Formation, Utah	91-38	Mudstone approaching iron formation composition	0.94			116
0.771	Young, 2002	Mineral Fork Formation, Utah	20-23	Mudstone approaching iron formation composition	1.02			119
0.771	Young, 2002	Mineral Fork Formation, Utah	91-43	Mudstone approaching iron formation composition	0.97			112
0.771	Young, 2002	Mineral Fork Formation, Utah	20-25	Mudstone approaching iron formation composition	0.81			117
0.771	Young, 2002	Mineral Fork Formation, Utah	91-53	Mudstone approaching iron formation composition	0.94			131
0.771	Young, 2002	Mineral Fork Formation, Utah	91-48	Mudstone approaching iron formation composition	0.86			102
0.771	Young, 2002	Mineral Fork Formation, Utah	91-52	Mudstone approaching iron formation composition	0.45			76
0.771	Young, 2002	Mineral Fork Formation, Utah	20-16	Mudstone approaching iron formation composition	0.95			116
0.76	Lei et al., 2020	Shalong IF, central Tianshan block, southern Altaids, China	xj305		0.23			49
0.76	Lei et al., 2020	Shalong IF, central Tianshan block, southern Altaids, China	xj307		0.06			6
0.76	Lei et al., 2020	Shalong IF, central Tianshan block, southern Altaids, China	xj309		0.16			112
0.76	Lei et al., 2020	Shalong IF, central Tianshan block, southern Altaids, China	xj302		0.03			63
0.76	Lei et al., 2020	Shalong IF, central Tianshan block, southern Altaids, China	xj301		0.24			123
0.76	Lei et al., 2020	Shalong IF, central Tianshan block, southern Altaids, China	xj310		0.05			47
0.76	Lei et al., 2020	Shalong IF, central Tianshan block, southern Altaids, China	xj320		0.14			105
0.76	Lei et al., 2020	Shalong IF, central Tianshan block, southern Altaids, China	xj319		0.31			129
0.76	Lei et al., 2020	Shalong IF, central Tianshan block, southern Altaids, China	xj318		0.38			110
0.76	Lei et al., 2020	Shalong IF, central Tianshan block, southern Altaids, China	xj314		0.11			114
0.76	Lei et al., 2020	Shalong IF, central Tianshan block, southern Altaids, China	xj313		0.31			134
0.76	Lei et al., 2020	Shalong IF, central Tianshan block, southern Altaids, China	xj312		0.25			138
0.75	Sun et al., 2022	Eastern Kunlun Orogenic Belt, Northwest China	IV	biotite-amphibole itabirite				410.6
0.75	Sun et al., 2022	Eastern Kunlun Orogenic Belt, Northwest China	II	pyroxene itabirite				59.44
0.75	Sun et al., 2022	Eastern Kunlun Orogenic Belt, Northwest China	II	pyroxene itabirite				58.23
0.75	Sun et al., 2022	Eastern Kunlun Orogenic Belt, Northwest China	II	pyroxene itabirite				49.55
0.75	Sun et al., 2022	Eastern Kunlun Orogenic Belt, Northwest China	IV	biotite-amphibole itabirite				460.5
0.75	Sun et al., 2022	Eastern Kunlun Orogenic Belt, Northwest China	IV	biotite-amphibole itabirite				408.7
0.75	Sun et al., 2022	Eastern Kunlun Orogenic Belt, Northwest China	IV	biotite-amphibole itabirite				404.1
0.75	Sun et al., 2022	Eastern Kunlun Orogenic Belt, Northwest China	IV	biotite-amphibole itabirite				466.7
0.75	Sun et al., 2022	Eastern Kunlun Orogenic Belt, Northwest China	IV	biotite-amphibole itabirite				494.6
0.75	Sun et al., 2022	Eastern Kunlun Orogenic Belt, Northwest China	IV	biotite-amphibole itabirite				402.2
0.75	Sun et al., 2022	Eastern Kunlun Orogenic Belt, Northwest China	IV	biotite-amphibole itabirite				466
0.75	Sun et al., 2022	Eastern Kunlun Orogenic Belt, Northwest China	II	amphibole itabirite				503.1
0.75	Sun et al., 2022	Eastern Kunlun Orogenic Belt, Northwest China	II	amphibole itabirite				565
0.75	Sun et al., 2022	Eastern Kunlun Orogenic Belt, Northwest China	II	amphibole itabirite				622.3
0.75	Sun et al., 2022	Eastern Kunlun Orogenic Belt, Northwest China	II	amphibole itabirite				576.9
0.75	Sun et al., 2022	Eastern Kunlun Orogenic Belt, Northwest China	II	amphibole itabirite				632.6
0.75	Sun et al., 2022	Eastern Kunlun Orogenic Belt, Northwest China	II	amphibole itabirite				584.1
0.75	Sun et al., 2022	Eastern Kunlun Orogenic Belt, Northwest China	I	quartz itabirite				137.7
0.75	Sun et al., 2022	Eastern Kunlun Orogenic Belt, Northwest China	I	quartz itabirite				86.77
0.75	Sun et al., 2022	Eastern Kunlun Orogenic Belt, Northwest China	II	amphibole itabirite				636.8
0.75	Sun et al., 2022	Eastern Kunlun Orogenic Belt, Northwest China	II	pyroxene itabirite				156.7
0.75	Sun et al., 2022	Eastern Kunlun Orogenic Belt, Northwest China	II	pyroxene itabirite				60.78
0.75	Sun et al., 2022	Eastern Kunlun Orogenic Belt, Northwest China	II	pyroxene itabirite				51.32
0.75	Sun et al., 2022	Eastern Kunlun Orogenic Belt, Northwest China	I	pyroxene itabirite				56.6
0.75	Sun et al., 2022	Eastern Kunlun Orogenic Belt, Northwest China	I	pyroxene itabirite				41.33
0.75	Sun et al., 2022	Eastern Kunlun Orogenic Belt, Northwest China	I	pyroxene itabirite				57.67
0.75	Sun et al., 2022	Eastern Kunlun Orogenic Belt, Northwest China	I	pyroxene itabirite				67.08
0.75	Sun et al., 2022	Eastern Kunlun Orogenic Belt, Northwest China	I	pyroxene itabirite				59
0.75	Sun et al., 2022	Eastern Kunlun Orogenic Belt, Northwest China	I	pyroxene itabirite				67.34
0.75	Sun et al., 2022	Eastern Kunlun Orogenic Belt, Northwest China	II	pyroxene itabirite				62.35
0.75	Sun et al., 2022	Eastern Kunlun Orogenic Belt, Northwest China	II	pyroxene itabirite				52.47
0.75	Sun et al., 2022	Eastern Kunlun Orogenic Belt, Northwest China	I	quartz itabirite				133.7
0.75	Sun et al., 2022	Eastern Kunlun Orogenic Belt, Northwest China	I	quartz itabirite				90.33
0.75	Sun et al., 2022	Eastern Kunlun Orogenic Belt, Northwest China	II	quartz itabirite				57.68
0.75	Sun et al., 2022	Eastern Kunlun Orogenic Belt, Northwest China	I	quartz itabirite				113.4
0.75	Sun et al., 2022	Eastern Kunlun Orogenic Belt, Northwest China	II	quartz itabirite				35.21
0.75	Sun et al., 2022	Eastern Kunlun Orogenic Belt, Northwest China	II	quartz itabirite				71.63
0.75	Sun et al., 2022	Eastern Kunlun Orogenic Belt, Northwest China	II	quartz itabirite				35.83
0.75	Sun et al., 2022	Eastern Kunlun Orogenic Belt, Northwest China	II	quartz itabirite				48.3
0.75	Sun et al., 2022	Eastern Kunlun Orogenic Belt, Northwest China	II	quartz itabirite				58.17
0.75	Sun et al., 2022	Eastern Kunlun Orogenic Belt, Northwest China	II	quartz itabirite				96.36
0.75	Sun et al., 2022	Eastern Kunlun Orogenic Belt, Northwest China	II	quartz itabirite				144.5
0.75	Sun et al., 2022	Eastern Kunlun Orogenic Belt, Northwest China	II	quartz itabirite				85.05
0.75	Sun et al., 2022	Eastern Kunlun Orogenic Belt, Northwest China	II	quartz itabirite				44.22
0.75	Sun et al., 2022	Eastern Kunlun Orogenic Belt, Northwest China	II	quartz itabirite				77.76
0.75	Sun et al., 2022	Eastern Kunlun Orogenic Belt, Northwest China	II	quartz itabirite				131.9
0.75	Sun et al., 2022	Eastern Kunlun Orogenic Belt, Northwest China	III	quartz itabirite				54.8
0.75	Sun et al., 2022	Eastern Kunlun Orogenic Belt, Northwest China	III	quartz itabirite				89.2
0.75	Sun et al., 2022	Eastern Kunlun Orogenic Belt, Northwest China	III	quartz itabirite				80.15
0.75	Sun et al., 2022	Eastern Kunlun Orogenic Belt, Northwest China	III	quartz itabirite				117.2
0.75	Sun et al., 2022	Eastern Kunlun Orogenic Belt, Northwest China	III	quartz itabirite				120.4
0.75	Sun et al., 2022	Eastern Kunlun Orogenic Belt, Northwest China	III	quartz itabirite				45.78
0.75	Sun et al., 2022	Eastern Kunlun Orogenic Belt, Northwest China	III	quartz itabirite				41.86
0.75	Sun et al., 2022	Eastern Kunlun Orogenic Belt, Northwest China	III	quartz itabirite				57.28
0.75	Buhn et al., 1992	Otjosondu, Namibia	D64	Hematite-feldspar-quartzites; impure iron formation	0.17	8.71		<10
0.75	Buhn et al., 1992	Otjosondu, Namibia	E56	Finely banded hematite-quartzites; pure iron-formation	<0.01	3.71		<10
0.75	Buhn et al., 1992	Otjosondu, Namibia	E57	Finely banded hematite-quartzites; pure iron-formation	0.02	0.43		<10
0.75	Buhn et al., 1992	Otjosondu, Namibia	E58	Finely banded hematite-quartzites; pure iron-formation	0.06	1.72		<10
0.75	Buhn et al., 1992	Otjosondu, Namibia	E59	Finely banded hematite-quartzites; pure iron-formation	0.2	19.76		13
0.75	Buhn et al., 1992	Otjosondu, Namibia	E60	Finely banded hematite-quartzites; pure iron-formation	0.43	11.88		42
0.75	Buhn et al., 1992	Otjosondu, Namibia	E61	Finely banded hematite-quartzites; pure iron-formation	0.2	13		<10
0.75	Buhn et al., 1992	Otjosondu, Namibia	E62	Finely banded hematite-quartzites; pure iron-formation	<0.01	15.75		<10
0.75	Buhn et al., 1992	Otjosondu, Namibia	D62	Hematite-feldspar-quartzites; impure iron formation	0.07	1.91		<10
0.75	Buhn et al., 1992	Otjosondu, Namibia	D63	Hematite-feldspar-quartzites; impure iron formation	0.16	5.97		<10
0.75	Buhn et al., 1992	Otjosondu, Namibia	D65	Hematite-feldspar-quartzites; impure iron formation	0.28	4.34		15
0.75	Basta et al., 2011	Wadi Karim, Egypt	K 28		0.0991158			40
0.75	Basta et al., 2011	Um Anab, Egypt	D 73		0.181342			64
0.75	Basta et al., 2011	Um Anab, Egypt	D 64		0.0999698			32
0.75	Basta et al., 2011	Um Anab, Egypt	D 62		0.286945			113
0.75	Basta et al., 2011	Um Anab, Egypt	D 59		0.139675			79
0.75	Basta et al., 2011	Um Anab, Egypt	D 31		0.408877			130
0.75	Basta et al., 2011	Um Anab, Egypt	D 10		0.130367			49
0.75	Basta et al., 2011	Wadi Karim, Egypt	K 78		0.134098			52
0.75	Basta et al., 2011	Wadi Karim, Egypt	K 77		0.115517			49
0.75	Basta et al., 2011	Wadi Karim, Egypt	K 76		0.097915			40
0.75	Basta et al., 2011	Wadi Karim, Egypt	K 74		0.0678094			50
0.75	Basta et al., 2011	Wadi Karim, Egypt	K 56		0.0287344			30
0.75	Basta et al., 2011	Wadi Karim, Egypt	K 48		0.13732			51
0.75	Basta et al., 2011	Wadi Karim, Egypt	K 44		0.0554033			41
0.75	Basta et al., 2011	Wadi Karim, Egypt	K 42		0.0821834			51
0.75	Basta et al., 2011	Wadi Karim, Egypt	K 37		0.156419			69
0.75	Basta et al., 2011	Wadi Karim, Egypt	K 29		0.0685304			34
0.75	Basta et al., 2011	Wadi Karim, Egypt	K 26		0.10892			49
0.75	Basta et al., 2011	Wadi Karim, Egypt	K 21		0.116235			66
0.75	Basta et al., 2011	Wadi Karim, Egypt	K 18		0.0895588			58
0.75	Basta et al., 2011	Um Anab, Egypt	D 71		0.0600543			56
0.75	Basta et al., 2011	Um Anab, Egypt	D 28		0.23954			77
0.75	Basta et al., 2011	Um Anab, Egypt	D 84		0.19875			60
0.75	Basta et al., 2011	Um Anab, Egypt	D 87		0.28484			118
0.743	Baldwin et al., 2012	NWT, Canada	13.6	Rapitan jaspers	0.0460464		0.0857401	38.0064
0.743	Baldwin et al., 2012	NWT, Canada	26.18	Rapitan jaspers	0.0066081		0.0696974	2.76933
0.743	Baldwin et al., 2012	NWT, Canada	17.28	Rapitan jaspers	0.0157725		0.11277	11.9948
0.743	Baldwin et al., 2012	NWT, Canada	17.78	Rapitan jaspers	0.0099598		0.126341	11.8445
0.743	Baldwin et al., 2012	NWT, Canada	18.4	Rapitan jaspers	0.0304157		0.0365526	88.3257
0.743	Baldwin et al., 2012	NWT, Canada	19.58	Rapitan jaspers	0.00751041		0.0252057	4.84058
0.743	Baldwin et al., 2012	NWT, Canada	21.13	Rapitan jaspers	0.0080503		0.0592919	6.38689
0.743	Baldwin et al., 2012	NWT, Canada	13.5	Rapitan jaspers	0.0358132		0.0318796	11.4065
0.743	Baldwin et al., 2012	NWT, Canada	21.58	Rapitan jaspers	0.0138066		0.0984758	23.0968
0.743	Baldwin et al., 2012	NWT, Canada	21.68	Rapitan jaspers	0.0107864		0.0888492	16.1826
0.743	Baldwin et al., 2012	NWT, Canada	27.08	Rapitan jaspers	0.00682636		0.116018	8.04766
0.743	Baldwin et al., 2012	NWT, Canada	15.5	Rapitan jaspers	0.00907583		0.0747567	10.7791
0.743	Baldwin et al., 2012	NWT, Canada	31.63	Rapitan jaspers	0.024038		0.109818	83.306
0.743	Baldwin et al., 2012	NWT, Canada	32.18	Rapitan jaspers	0.0132068		0.269218	13.8419
0.743	Baldwin et al., 2012	NWT, Canada	33.21	Rapitan jaspers	0.0127704		0.263757	25.891
0.743	Baldwin et al., 2012	NWT, Canada	33.32	Rapitan jaspers	0.00649519		0.548199	17.7703
0.743	Baldwin et al., 2012	NWT, Canada	33.61	Rapitan jaspers	0.00773885		0.346596	15.616
0.743	Baldwin et al., 2012	NWT, Canada	33.91	Rapitan jaspers	0.00639851		0.464653	14.1239
0.743	Baldwin et al., 2012	NWT, Canada	34.11	Rapitan jaspers	0.0102231		0.171589	15.0467
0.743	Baldwin et al., 2012	NWT, Canada	34.5	Rapitan jaspers	0.0110403		0.468705	21.5512
0.743	Baldwin et al., 2012	NWT, Canada	16.5	Rapitan jaspers	0.00955424		0.0576883	11.7694
0.743	Baldwin et al., 2012	NWT, Canada	27.13	Rapitan jaspers	0.0068074		0.131457	9.88275
0.743	Baldwin et al., 2012	NWT, Canada	14.73	Rapitan jaspers	0.0457805		0.179647	37.1286
0.743	Baldwin et al., 2012	NWT, Canada	4.9	Rapitan jaspers	0.018509		0.496992	19.4862
0.743	Baldwin et al., 2012	NWT, Canada	12.18	Rapitan jaspers	0.0957846		0.364452	143.453
0.743	Baldwin et al., 2012	NWT, Canada	11.68	Rapitan jaspers	0.125089		0.148664	223.928
0.743	Baldwin et al., 2012	NWT, Canada	9.18	Rapitan jaspers	0.0023473		0.037986	5.76288
0.743	Baldwin et al., 2012	NWT, Canada	5.6	Rapitan jaspers	0.0123958		0.486309	15.4684
0.743	Baldwin et al., 2012	NWT, Canada	5.48	Rapitan jaspers	0.00978436		0.280445	9.35159
0.743	Baldwin et al., 2012	NWT, Canada	5.3	Rapitan jaspers	0.00636625		0.273658	8.58082
0.743	Baldwin et al., 2012	NWT, Canada	5.1	Rapitan jaspers	0.00641398		0.377705	9.29703
0.743	Baldwin et al., 2012	NWT, Canada	5	Rapitan jaspers	0.00668199		0.425756	11.6849
0.743	Baldwin et al., 2012	NWT, Canada	13.95	Rapitan jaspers	0.0188991		0.0487347	9.96318
0.743	Baldwin et al., 2012	NWT, Canada	4.83	Rapitan jaspers	0.0082828		0.382043	17.5463
0.743	Baldwin et al., 2012	NWT, Canada	4.8	Rapitan jaspers	0.00817726		0.129014	10.608
0.743	Baldwin et al., 2012	NWT, Canada	4.5	Rapitan jaspers	0.0102298		0.367617	16.2094
0.743	Baldwin et al., 2012	NWT, Canada	4.1	Rapitan jaspers	0.00692323		0.0521246	10.6041
0.743	Baldwin et al., 2012	NWT, Canada	2.6	Rapitan jaspers	0.0262523		0.237847	30.9089
0.743	Baldwin et al., 2012	NWT, Canada	2.55	Rapitan jaspers	0.0184622		0.301221	33.9602
0.743	Baldwin et al., 2012	NWT, Canada	2.42	Rapitan jaspers	0.00984981		0.930913	10.0981
0.743	Baldwin et al., 2012	NWT, Canada	2.35	Rapitan jaspers	0.0229629		0.333366	19.108
0.743	Baldwin et al., 2012	NWT, Canada	2.31	Rapitan jaspers	0.0374313		0.23312	39.2039
0.74	Klein and Ladeira., 2004	Urucum district, Brazil	Ur1A		0.051	68.05
0.74	Klein and Ladeira., 2004	Urucum district, Brazil	U-2-3		0.171	28.7
0.74	Klein and Ladeira., 2004	Urucum district, Brazil	U-2-2		0.134	55.03
0.74	Klein and Ladeira., 2004	Urucum district, Brazil	U-2-7		0.044	70.43
0.74	Klein and Ladeira., 2004	Urucum district, Brazil	U-2-8		0.065	58.14
0.74	Klein and Ladeira., 2004	Urucum district, Brazil	U-2-9		0.062	48.36
0.725	Lottermoser and Ashley., 2000	Braemar - Australia (Iron Peak)	BR8	Magnetite, hematite, quartz, chlorite, biotite and carbonate	0.22	66.77		80
0.725	Lottermoser and Ashley., 2000	Braemar - Australia (Braemar)	BR52	Fe oxides, quartz, carbonate, plagioclase, chlorite, biotite and goethite	0.37	49.76		52
0.725	Lottermoser and Ashley., 2000	Braemar - Australia (Razorback Ridge)	BR13	Magnetite, hematite, quartz, chlorite, biotite and carbonate	0.33	62.34		88
0.725	Lottermoser and Ashley., 2000	Braemar - Australia (Oultalpa NW)	BR40	Magnetite, hematite, goethite, biotite, quartz and carbonate	0.18	78.91		85
0.725	Lottermoser and Ashley., 2000	Braemar - Australia (Braemar)	BR53	Magnetite, hematite, quartz, carbonate, chlorite and biotite	0.26	66.2		113
0.717	Khalil et al., 2015	Gebel EI Hadid BIF, central Eastern Desert of Egypt	H-12		0.06		0.3	57
0.717	Khalil et al., 2015	Gebel EI Hadid BIF, central Eastern Desert of Egypt	H-37		0.1		0.3	56
0.717	Khalil et al., 2015	Gebel EI Hadid BIF, central Eastern Desert of Egypt	H-26		0.27		0.4	91
0.717	Khalil et al., 2015	Gebel EI Hadid BIF, central Eastern Desert of Egypt	H-21		0.07		0.5	82
0.717	Khalil et al., 2015	Gebel EI Hadid BIF, central Eastern Desert of Egypt	H-3		0.03		0.5	64
0.717	Khalil et al., 2015	Gebel EI Hadid BIF, central Eastern Desert of Egypt	H12a		0.03		0.7	32
0.717	Khalil et al., 2015	Gebel EI Hadid BIF, central Eastern Desert of Egypt	H-14a		0.42		0.4	52
0.716	Halverson et al., 2011	Rapitan Group IF, northern Canadian	G22.22.7	hem–mud	0.331667		1.6	75
0.716	Halverson et al., 2011	Rapitan Group IF, northern Canadian	G2234.7	hem–silt	0.465		2.28	105
0.716	Halverson et al., 2011	Rapitan Group IF, northern Canadian	G22.32.9	hem–mud	0.186667		2.11	91
0.716	Halverson et al., 2011	Rapitan Group IF, northern Canadian	G22.29.8	hem–mud	0.893333		1.11	98
0.716	Halverson et al., 2011	Rapitan Group IF, northern Canadian	G22.28	hem–mud	0.476667		1.48	87
0.716	Halverson et al., 2011	Rapitan Group IF, northern Canadian	G22.26.1	hem–mud	0.178333		11.7	183
0.716	Halverson et al., 2011	Rapitan Group IF, northern Canadian	G22.24.8	hem–jasp	0.0201667		2.27	30
0.716	Halverson et al., 2011	Rapitan Group IF, northern Canadian	G22.21.3	hem–jasp	0.0226667		5.6	24
0.716	Halverson et al., 2011	Rapitan Group IF, northern Canadian	JA-2		0.568333		1.02	123
0.716	Halverson et al., 2011	Rapitan Group IF, northern Canadian	JB-3		1.375		1.32	428
0.716	Halverson et al., 2011	Rapitan Group IF, northern Canadian	G22.5.4	fer–silt	1.10333		0.36	221
0.716	Halverson et al., 2011	Rapitan Group IF, northern Canadian	G22.13.5	fer–diam	0.608333		0.3	162
0.716	Halverson et al., 2011	Rapitan Group IF, northern Canadian	G22.19.8	hem–silt	0.783333		0.53	145
0.716	Halverson et al., 2011	Rapitan Group IF, northern Canadian	G22.21.1	hem–jasp	0.0141667		1.33	17
0.7	Feng et al., 2017	Fulu IF, Zhongjiajiang section, China	19.7 ZJJ Fulu		0.65			102
0.7	Feng et al., 2017	Fulu IF, Zhongjiajiang section, China	20.3 ZJJ Fulu		0.85			146
0.7	Feng et al., 2017	Fulu IF, Zhongjiajiang section, China	1.7 ZJJ Fulu		0.39			61
0.7	Feng et al., 2017	Fulu IF, Lanyang section, China	TB20 LY Fulu		0.27			91
0.7	Feng et al., 2017	Fulu IF, Zhongjiajiang section, China	1.1 ZJJ Fulu		0.33			116
0.7	Feng et al., 2017	Fulu IF, Zhongjiajiang section, China	4.7 ZJJ Fulu		0.36			70
0.7	Feng et al., 2017	Fulu IF, Zhongjiajiang section, China	5.6 ZJJ Fulu		0.43			86
0.7	Feng et al., 2017	Fulu IF, Zhongjiajiang section, China	7.6 ZJJ Fulu		0.32			75
0.7	Feng et al., 2017	Fulu IF, Zhongjiajiang section, China	8.5 ZJJ Fulu		0.33			62
0.7	Feng et al., 2017	Fulu IF, Zhongjiajiang section, China	9.4 ZJJ Fulu		0.44			77
0.7	Feng et al., 2017	Fulu IF, Zhongjiajiang section, China	11 ZJJ Fulu		0.28			63
0.7	Feng et al., 2017	Fulu IF, Zhongjiajiang section, China	12.7 ZJJ Fulu		0.71			106
0.7	Feng et al., 2017	Fulu IF, Zhongjiajiang section, China	13.9 ZJJ Fulu		0.43			87
0.7	Feng et al., 2017	Fulu IF, Zhongjiajiang section, China	14.7 ZJJ Fulu		0.46			87
0.7	Feng et al., 2017	Fulu IF, Zhongjiajiang section, China	15.6 ZJJ Fulu		0.57			98
0.7	Feng et al., 2017	Fulu IF, Zhongjiajiang section, China	17.8 ZJJ Fulu		0.41			73
0.7	Feng et al., 2017	Fulu IF, Lanyang section, China	TB15 LY Fulu		0.27			61
0.7	Feng et al., 2017	Fulu IF, Lanyang section, China	TB12 LY Fulu		0.52			110
0.7	Feng et al., 2017	Fulu IF, Lanyang section, China	TB9 LY Fulu		0.54			103
0.7	Feng et al., 2017	Fulu IF, Lanyang section, China	TB6 LY Fulu		1.11			133
0.7	Feng et al., 2017	Fulu IF, Zhongjiajiang section, China	21.9 ZJJ Fulu		0.71			150
0.7	Feng et al., 2017	Fulu IF, Zhongjiajiang section, China	21.3 ZJJ Fulu		0.7			131
0.7	Feng et al., 2017	Fulu IF, Lanyang section, China	TB18 LY Fulu		0.28			73
0.7	Feng et al., 2017	Fulu IF, Lanyang section, China	TB24 LY Fulu		0.22			72
0.7	Feng et al., 2017	Fulu IF, Zhongjiajiang section, China	2.5 ZJJ Fulu		0.34			76
0.7	Feng et al., 2017	Fulu IF, Zhongjiajiang section, China	3.2 ZJJ Fulu		0.25			59
0.745	Breitkopf, 1988	Chuos Formation, Namibia	CA2/6	Type 2 Amphibolite associated iron formation	0.47			109
0.745	Breitkopf, 1988	Chuos Formation, Namibia	CD2	Diamictite-associated iron formation	0.08			107
0.745	Breitkopf, 1988	Chuos Formation, Namibia	CD1	Diamictite-associated iron formation	0.02			41
0.745	Breitkopf, 1988	Chuos Formation, Namibia	CA1/3	Type 1 Amphibolite associated iron formation	0.08			122
0.745	Breitkopf, 1988	Chuos Formation, Namibia	CA1/2	Type 1 Amphibolite associated iron formation	0.08			74
0.745	Breitkopf, 1988	Chuos Formation, Namibia	CA1/1	Type 1 Amphibolite associated iron formation	0.08			59
0.745	Breitkopf, 1988	Chuos Formation, Namibia	CA2/7	Type 2 Amphibolite associated iron formation	1			175
0.745	Breitkopf, 1988	Diamictite-associated iron formation	8	Diamictite-associated iron formation	0.04			63
0.745	Breitkopf, 1988	Chuos Formation, Namibia	CA2/4	Type 2 Amphibolite associated iron formation	0.57			130
0.745	Breitkopf, 1988	Chuos Formation, Namibia	CA2/3	Type 2 Amphibolite associated iron formation	0.68			125
0.745	Breitkopf, 1988	Chuos Formation, Namibia	CA2/2	Type 2 Amphibolite associated iron formation	0.67			111
0.745	Breitkopf, 1988	Chuos Formation, Namibia	CA2/1	Type 2 Amphibolite associated iron formation	0.62			104
0.745	Breitkopf, 1988	Type 1 Amphibolite-associated iron formation	9	Amphibolite-associated iron formation	0.08			85
0.745	Breitkopf, 1988	Type 2 Amphibolite-associated iron formation	10	Amphibolite-associated iron formation	0.64			136
0.745	Breitkopf, 1988	Chuos Formation, Namibia	CD4	Diamictite-associated iron formation	0.04			78
0.745	Breitkopf, 1988	Chuos Formation, Namibia	CD3	Diamictite-associated iron formation	0.01			27
0.745	Breitkopf, 1988	Chuos Formation, Namibia	CA2/5	Type 2 Amphibolite associated iron formation	0.45			195
0.7	Breitkopf, 1988	Chuos Formation, Namibia	CA!/3	amphibolite-associated BIF - Type 1	0.08	73.88		122
0.7	Breitkopf, 1988	Chuos Formation, Namibia	CA1/1	amphibolite-associated BIF - Type 1	0.08	50.82		59
0.7	Breitkopf, 1988	Chuos Formation, Namibia	CD1	diamictite-associated BIF	0.02	35.83		41
0.7	Breitkopf, 1988	Chuos Formation, Namibia	CD3	diamictite-associated BIF	0.01	26.28		27
0.7	Breitkopf, 1988	Chuos Formation, Namibia	CD4	diamictite-associated BIF	0.04	57.31		78
0.7	Breitkopf, 1988	Chuos Formation, Namibia	CD2	diamictite-associated BIF	0.08	32.86		107
0.7	Breitkopf, 1988	Chuos Formation, Namibia	CA2/5	amphibolite-associated BIF - Type 2	0.45	49.01		195
0.7	Breitkopf, 1988	Chuos Formation, Namibia	CA2/6	amphibolite-associated BIF - Type 2	0.47	39.2		109
0.7	Breitkopf, 1988	Chuos Formation, Namibia	CA2/4	amphibolite-associated BIF - Type 2	0.57	39.55		130
0.7	Breitkopf, 1988	Chuos Formation, Namibia	CA2/7	amphibolite-associated BIF - Type 2	1	34.94		175
0.7	Breitkopf, 1988	Chuos Formation, Namibia	CA2/1	amphibolite-associated BIF - Type 2	0.62	31.1		104
0.7	Breitkopf, 1988	Chuos Formation, Namibia	CA2/2	amphibolite-associated BIF - Type 2	0.67	30.28		111
0.7	Breitkopf, 1988	Chuos Formation, Namibia	CA2/3	amphibolite-associated BIF - Type 2	0.68	22.89		125
0.7	Breitkopf, 1988	Chuos Formation, Namibia	CA1/2	amphibolite-associated BIF - Type 1	0.08	71.64		74
0.59	Mohseni and Aftabi, 2015	Esfordi Formation, Iran	Esfordi		0.87			767
0.59	Mohseni and Aftabi, 2015	Esfordi Formation, Iran	Mishdovan		0.38			1269
0.59	Mohseni and Aftabi, 2015	Esfordi Formation, Iran	Choghart		0.76			504
0.59	Mohseni and Aftabi, 2015	Esfordi Formation, Iran	Sehchahun (Jaspilite)		0.01			23
0.59	Mohseni and Aftabi, 2015	Esfordi Formation, Iran	Anomaly XIIa		1.79			2283
0.59	Mohseni and Aftabi, 2015	Esfordi Formation, Iran	Zagia		0.54			705
0.59	Mohseni and Aftabi, 2015	Esfordi Formation, Iran	Narigan		0.2			49
0.56	Hu et al., 2022	Kukeate IF, Western Kunlun orogenic belt, NW China	HHZG-6				0.11	3
0.56	Hu et al., 2022	Kukeate IF, Western Kunlun orogenic belt, NW China	HHZG-14		0.02		0.29	6
0.56	Hu et al., 2022	Kukeate IF, Western Kunlun orogenic belt, NW China	HHZG-10		0.03		0.05	10
0.56	Hu et al., 2022	Kukeate IF, Western Kunlun orogenic belt, NW China	HHZG-7		0.02		0.08	7
0.56	Hu et al., 2022	Kukeate IF, Western Kunlun orogenic belt, NW China	HHZG-8		0.02		0.06	6
0.56	Hu et al., 2022	Kukeate IF, Western Kunlun orogenic belt, NW China	HHZG-9		0.01		0.07	5
0.56	Hu et al., 2022	Kukeate IF, Western Kunlun orogenic belt, NW China	2014HHZG-16		0.01			3
0.56	Hu et al., 2022	Kukeate IF, Western Kunlun orogenic belt, NW China	2014HHZG-10		0.02		0.06	5
0.56	Hu et al., 2022	Kukeate IF, Western Kunlun orogenic belt, NW China	2014HHZG-9				0.06	1
0.56	Hu et al., 2022	Kukeate IF, Western Kunlun orogenic belt, NW China	HHZG2014-1		0.05		0.06	8
0.56	Hu et al., 2022	Kukeate IF, Western Kunlun orogenic belt, NW China	HHZG2014-2					3
0.558	Atapour and Aftabi, 2017	Iran	BIF (distal-2)		0.06		8	34
0.558	Atapour and Aftabi, 2017	Iran	BIF (distal-1)		0.03		35	48
0.558	Atapour and Aftabi, 2017	Iran	BIF (distal-3)		0.09		6	29
0.558	Atapour and Aftabi, 2017	Iran	BIF (proximal-1)		0.3		34	38
0.558	Atapour and Aftabi, 2017	Iran	BIF (distal-4)		0.12		3	41
0.527	Li et al., 2018	Jiertieke area, West Kunlun orogenic belt, China	TJE2-2-8		0.1
0.527	Li et al., 2018	Jiertieke area, West Kunlun orogenic belt, China	TJE1-7		0.07
0.527	Li et al., 2018	Jiertieke area, West Kunlun orogenic belt, China	ZK4801-146		0.2
0.527	Li et al., 2018	Jiertieke area, West Kunlun orogenic belt, China	TJE2-2-10		0.01
0.527	Li et al., 2018	Jiertieke area, West Kunlun orogenic belt, China	TJE2-2-9		0.01
0.527	Li et al., 2018	Jiertieke area, West Kunlun orogenic belt, China	TTA6-4		0.02
0.527	Li et al., 2018	Jiertieke area, West Kunlun orogenic belt, China	TTA6-3		0.03
0.527	Li et al., 2018	Jiertieke area, West Kunlun orogenic belt, China	YLK11-7		0.28
0.527	Li et al., 2018	Jiertieke area, West Kunlun orogenic belt, China	TYL7-6		0.16
0.527	Li et al., 2018	Jiertieke area, West Kunlun orogenic belt, China	TJE1-6		0.06
0.497	Li et al., 2022	Zankan iron deposit, China	TZK13-3–1		0.09
0.497	Li et al., 2022	Zankan iron deposit, China	TZK13-3–3		0.22
0.497	Li et al., 2022	Zankan iron deposit, China	TZK11-3		0.63
0.497	Li et al., 2022	Zankan iron deposit, China	TZK11-2		0.62
0.497	Li et al., 2022	Zankan iron deposit, China	ZK12-382		0.03
0.497	Li et al., 2022	Zankan iron deposit, China	TZK5-4		0.83
0.497	Li et al., 2022	Zankan iron deposit, China	TZK5-1		1.59
0.497	Li et al., 2022	Zankan iron deposit, China	TZK11-4		0.87
0.497	Li et al., 2022	Zankan iron deposit, China	ZK504-14		0.36
0.497	Li et al., 2022	Zankan iron deposit, China	TZK5-5		0.97
0.488	Davidson, et al., 2001	Mt Windsor exhalites, Australia	FJ7	silica iron exhalite	<0.01		11.7	13
0.488	Davidson, et al., 2001	Mt Windsor exhalites, Australia	FJ1	silica iron exhalite	<0.01		3.73	11
0.488	Davidson, et al., 2001	Mt Windsor exhalites, Australia	SJ12	silica iron exhalite	<0.01		4.22	34
0.488	Davidson, et al., 2001	Mt Windsor exhalites, Australia	SJ1	silica iron exhalite	<0.01		2.92	16
0.488	Davidson, et al., 2001	Mt Windsor exhalites, Australia	FJ10	silica iron exhalite	0.02		1.84	9
0.488	Davidson, et al., 2001	Mt Windsor exhalites, Australia	FJ14	silica iron exhalite	0.03		4.99	16
0.488	Davidson, et al., 2001	Mt Windsor exhalites, Australia	FJ5	silica iron exhalite	0.02		11.85	11
0.488	Davidson, et al., 2001	Mt Windsor exhalites, Australia	FJ4	silica iron exhalite	0.02		18.6	31
0.488	Davidson, et al., 2001	Mt Windsor exhalites, Australia	SJ10	silica iron exhalite	0.06		2.76	70
0.488	Davidson, et al., 2001	Mt Windsor exhalites, Australia	SJ4	silica iron exhalite	0.05		2.18	48
0.488	Davidson, et al., 2001	Mt Windsor exhalites, Australia	FJ6	silica iron exhalite	<0.01		14.77	6
0.488	Davidson, et al., 2001	Mt Windsor exhalites, Australia	FJ17	silica iron exhalite	0.06		2.63	63
0.488	Davidson, et al., 2001	Mt Windsor exhalites, Australia	SJ3	silica iron exhalite	0.21		1.71	52
0.488	Davidson, et al., 2001	Mt Windsor exhalites, Australia	SJ5	silica iron exhalite	0.04		2.64	45
0.4835	Duhig et al., 1992	Mount Windsor Volcanic Belt, Australia. Wadys Mill	WM4172844	ironstone. Thalanga massive sulfide deposit are principally composed of silica and iron oxide. Quartz-Hematite or Magnetite	0.05			5.7
0.4835	Duhig et al., 1992	Mount Windsor Volcanic Belt, Australia. Regional samples	TH1A 72853	ironstone. Thalanga massive sulfide deposit are principally composed of silica and iron oxide. Quartz-Hematite or Magnetite	0.01			14
0.4835	Duhig et al., 1992	Mount Windsor Volcanic Belt, Australia. Regional samples	S60 74353	ironstone. Thalanga massive sulfide deposit are principally composed of silica and iron oxide. Quartz-Hematite or Magnetite	0.02			6
0.4835	Duhig et al., 1992	Mount Windsor Volcanic Belt, Australia. Regional samples	SS15C 73185	ironstone. Thalanga massive sulfide deposit are principally composed of silica and iron oxide. Quartz-Hematite or Magnetite	0.19		1	54
0.4835	Duhig et al., 1992	Mount Windsor Volcanic Belt, Australia. Regional samples	TC9 73124	ironstone. Thalanga massive sulfide deposit are principally composed of silica and iron oxide. Quartz-Hematite or Magnetite	<0.01		0.7	12
0.4835	Duhig et al., 1992	Mount Windsor Volcanic Belt, Australia. Regional samples	S58 74352	ironstone. Thalanga massive sulfide deposit are principally composed of silica and iron oxide. Quartz-Hematite or Magnetite	<0.01			15
0.4835	Duhig et al., 1992	Mount Windsor Volcanic Belt, Australia. Regional samples	HW39 73108	ironstone. Thalanga massive sulfide deposit are principally composed of silica and iron oxide. Quartz-Hematite or Magnetite	<0.01		2.9	7
0.4835	Duhig et al., 1992	Mount Windsor Volcanic Belt, Australia. Regional samples	TB2 72894	ironstone. Thalanga massive sulfide deposit are principally composed of silica and iron oxide. Quartz-Hematite or Magnetite	<0.01		0.8	13
0.4835	Duhig et al., 1992	Mount Windsor Volcanic Belt, Australia. Regional samples	SS15D 73186	ironstone. Thalanga massive sulfide deposit are principally composed of silica and iron oxide. Quartz-Hematite or Magnetite	0.06		0.4	15
0.4835	Duhig et al., 1992	Mount Windsor Volcanic Belt, Australia. Regional samples	SS15A 73183	ironstone. Thalanga massive sulfide deposit are principally composed of silica and iron oxide. Quartz-Hematite or Magnetite	0.02		0.6	33
0.4835	Duhig et al., 1992	Mount Windsor Volcanic Belt, Australia. Regional samples	WT6 72940	ironstone. Thalanga massive sulfide deposit are principally composed of silica and iron oxide. Quartz-Hematite or Magnetite	<0.01		0.6	7
0.4835	Duhig et al., 1992	Mount Windsor Volcanic Belt, Australia. Thalanga horizon	S37 74360	ironstone. Thalanga massive sulfide deposit are principally composed of silica and iron oxide. Quartz-Hematite or Magnetite	0.04		0.9	38
0.4835	Duhig et al., 1992	Mount Windsor Volcanic Belt, Australia. Thalanga horizon	S39 74356	ironstone. Thalanga massive sulfide deposit are principally composed of silica and iron oxide. Quartz-Hematite or Magnetite	0.02		2.2	26
0.4835	Duhig et al., 1992	Mount Windsor Volcanic Belt, Australia. Trooper Creek Formation	TH40	ironstone. Thalanga massive sulfide deposit are principally composed of silica and iron oxide. Quartz-Hematite or Magnetite	0.03			35
0.4835	Duhig et al., 1992	Mount Windsor Volcanic Belt, Australia. Trooper Creek Formation	S31 74366	ironstone. Thalanga massive sulfide deposit are principally composed of silica and iron oxide. Quartz-Hematite or Magnetite	0.02		0.7	15
0.4835	Duhig et al., 1992	Mount Windsor Volcanic Belt, Australia. Trooper Creek Formation	S29 74365	ironstone. Thalanga massive sulfide deposit are principally composed of silica and iron oxide. Quartz-Hematite or Magnetite	<0.01		0.6	37
0.4835	Duhig et al., 1992	Mount Windsor Volcanic Belt, Australia. Trooper Creek Formation	S27 74364	ironstone. Thalanga massive sulfide deposit are principally composed of silica and iron oxide. Quartz-Hematite or Magnetite	0.03		1.7
0.4835	Duhig et al., 1992	Mount Windsor Volcanic Belt, Australia. Thalanga horizon	S17 74358	ironstone. Thalanga massive sulfide deposit are principally composed of silica and iron oxide. Quartz-Hematite or Magnetite	0.04		0.8	101
0.4805	Sturesson et al. 1999	Estonia	V98	Ooid from drill core	0.672	71.3	2.92	362
0.4805	Sturesson et al. 1999	Estonia	E6	Oolitic Clays	0.951	8.34	3.2	130
0.4805	Sturesson et al. 1999	Russia	R13a	Oolite base	0.646	67.4	8.14	740
0.4805	Sturesson et al. 1999	Estonia	E6L	Limonitic Ooid	1.29	30	3.2	285
0.4805	Sturesson et al. 1999	Estonia	568	Ooid from drill core	1.45	68.7	3.08	384
0.4805	Sturesson et al. 1999	Estonia	365	Ooid from drill core	1.07	46.1	2.8	330
0.4805	Sturesson et al. 1999	Estonia	306	Ooid from drill core	0.752	43	3.5	277
0.4805	Sturesson et al. 1999	Estonia	271	Ooid from drill core	0.814	54.4	3.25	501
0.4805	Sturesson et al. 1999	Estonia	E3	Oolitic Clays	0.777	5.46	1.8	120
0.4805	Sturesson et al. 1999	Estonia	E2	Oolitic Clays	0.963	11.8	1.5	203
0.4805	Sturesson et al. 1999	Estonia	E6P	Phosphatic Ooid	0.582	4.83	3.04	69.3
0.4805	Sturesson et al. 1999	Russia	R13b	Major oolitic clay bed	0.955	66.7	7.39	647
0.4805	Sturesson et al. 1999	Russia	R10b	Major oolitic clay bed	0.906	70.3	5.86	712
0.4805	Sturesson et al. 1999	Russia	R4	Ooid	0.979	65.9	10.8	691
0.4805	Sturesson et al. 1999	Russia	R12b	Major oolitic clay bed	0.585	68.9	13.3	753
0.4805	Sturesson et al. 1999	Russia	R12a	Oolite base	1.29	66.3	13.1	913
0.4805	Sturesson et al. 1999	Russia	R10c	Oolite top	0.715	69.8	6.71	644
0.4805	Sturesson et al. 1999	Russia	R10a	Oolite base	1.07	66.9	8.79	611
0.4805	Sturesson et al. 1999	Russia	R4	Oolitic Clays	1.07	5.59	2.7	173
0.4805	Sturesson et al. 1999	Russia	R2	Oolitic Clays	1.15	5.96	2.4	172
0.4805	Sturesson et al. 1999	Russia	R12c	Oolite top	0.96	69.6	8.37	674
0.4805	Sturesson et al. 1999	Russia	R13c	Oolite top	1.04	65.5		587
0.48	Sturesson et al. 1999	USA	Millbrig	Oolitic Clays; average of 25	0.22	1.4
0.48	Sturesson et al. 1999	USA	Deicke	Oolitic Clays; average of 24	0.46	2.2
0.48	Sturesson et al. 1999	United Kingdom	UK	Oolitic Clays; average of 4	0.97	4.9
0.466	Grenne and Slack, 2005	Lokken Ophiolite, Norway - Jasper Beds	H-19	jasper layer	0.08	16.8	<1	76
0.466	Grenne and Slack, 2005	Lokken Ophiolite, Norway - Jasper Beds	S-4	jasper layer	<0.02	5.3	<1	8
0.466	Grenne and Slack, 2005	Lokken Ophiolite, Norway - Jasper Beds	L-4	jasper layer	<0.02	6.6	1.1	17
0.466	Grenne and Slack, 2005	Lokken Ophiolite, Norway - Jasper Beds	H-13	jasper layer	<0.02	2.7	<1	9.1
0.466	Grenne and Slack, 2005	Lokken Ophiolite, Norway - Jasper Beds	H-16	jasper clast	0.03	15.2	1.2	320
0.466	Grenne and Slack, 2005	Lokken Ophiolite, Norway - Jasper Beds	H-12	jasper clast	<0.02	3.9	<1	23
0.466	Grenne and Slack, 2005	Lokken Ophiolite, Norway - Jasper Beds	H-6	jasper layer	<0.02	8.7	1.2	32
0.466	Grenne and Slack, 2005	Lokken Ophiolite, Norway - Jasper Beds	H-7	jasper layer	<0.02	6.4	<1	34
0.466	Grenne and Slack, 2005	Lokken Ophiolite, Norway - Jasper Beds	H-17	jasper layer	<0.02	6.2	<1	53
0.466	Grenne and Slack, 2005	Lokken Ophiolite, Norway - Jasper Beds	S-6	jasper layer	<0.02	15.4	<1	7.6
0.466	Grenne and Slack, 2005	Lokken Ophiolite, Norway - Jasper Beds	L-3	jasper layer	<0.02	18.3	<1	58
0.4786	Mucke et al., 2005	Thuringian Basin	IV	oolitic ironstone	0.53	26.3		155
0.4625	Mucke et al., 2005	Welsh Basin	I	oolitic ironstone	0.46	6.17		392
0.4625	Mucke et al., 2005	Welsh Basin	VI	oolitic ironstone	0.41	31.1		416
0.4625	Mucke et al., 2005	Welsh Basin	III	oolitic ironstone	0.28	34.9		553
0.4609	Mucke et al., 2005	Prague Basin	VIII	oolitic ironstone	0.34	58		638
0.4609	Mucke et al., 2005	Prague Basin	VII	oolitic ironstone	0.22	2.47		209
0.4609	Mucke et al., 2005	Prague Basin	VI	oolitic ironstone	0.29	19.8		610
0.4609	Mucke et al., 2005	Prague Basin	V	oolitic ironstone	0.46	4.27		405
0.455	Mucke et al., 2005	Welsh Basin	IV	oolitic ironstone	0.13	16.2		447
0.455	Mucke et al., 2005	Welsh Basin	II	oolitic ironstone	0.63	5.63		373
0.455	Mucke et al., 2005	Welsh Basin	V	oolitic ironstone	0.75	6.7		235
0.449	Mucke et al., 2005	Thuringian Basin	I	oolitic ironstone	0.75	5.36		745
0.449	Mucke et al., 2005	Thuringian Basin	III	oolitic ironstone	0.72	2.4		463
0.4475	Mucke et al., 2005	Thuringian Basin	II	oolitic ironstone	0.32	4.14		289
0.416	Mucke et al., 2005	Red Mountain Formation	X	oolitic ironstone	0.35	13.88		109
0.416	Mucke et al., 2005	Red Mountain Formation	VIII	oolitic ironstone	0.15	38.02		234
0.1925	Mucke et al., 2005	Cleveland Ironstone	VII	oolitic ironstone	0.23	8.5		196
0.19	Mucke et al., 2005	Scrunthorpe	XII	oolitic ironstone	0.41	30.8		559
0.19	Mucke et al., 2005	Scrunthorpe	XI	oolitic ironstone	0.55	18		514
0.1875	Mucke et al., 2005	Cleveland Ironstone	X	oolitic ironstone	0.21	8.53		335
0.1875	Mucke et al., 2005	Cleveland Ironstone	XII	oolitic ironstone	0.19	2.56		179
0.1875	Mucke et al., 2005	Cleveland Ironstone	XI	oolitic ironstone	0.21	4.59		279
0.1875	Mucke et al., 2005	Cleveland Ironstone	IX	oolitic ironstone	0.39	1.4		839
0.1875	Mucke et al., 2005	Cleveland Ironstone	VIII	oolitic ironstone	0.08	4.75		122
0.175	Mucke et al., 2005	France	VI	oolitic ironstone	0.26	51		812
0.175	Mucke et al., 2005	France	X	oolitic ironstone	0.14	26.7		272
0.175	Mucke et al., 2005	France	IX	oolitic ironstone	0.25	45.5		532
0.175	Mucke et al., 2005	France	VIII	oolitic ironstone	0.2	42.2		495
0.175	Mucke et al., 2005	France	VII	oolitic ironstone	0.21	43.8		392
0.138	Mucke et al., 2005	Salzgitter	IV	oolitic ironstone	0.24	63.7		665
0.138	Mucke et al., 2005	Salzgitter	V	oolitic ironstone	0.21	53.5		854
0.138	Mucke et al., 2005	Salzgitter	I	oolitic ironstone	0.18	54.05		683
0.138	Mucke et al., 2005	Salzgitter	II	oolitic ironstone	0.19	55.15		1542
0.138	Mucke et al., 2005	Salzgitter	III	oolitic ironstone	0.37	44.75		1286
0.087	Mucke et al., 2005	Aswan	II	oolitic ironstone	0.31	65.11		330
0.087	Mucke et al., 2005	Aswan	IV	oolitic ironstone	0.32	53.04		364
0.087	Mucke et al., 2005	Aswan	V	oolitic ironstone	0.28	69.8		1043
0.087	Mucke et al., 2005	Aswan	VI	oolitic ironstone	0.27	65.5		307
0.086	Mucke et al., 2005	Kalabsha, Egypt	I	oolitic ironstone	2.84	0.79		244
0.086	Mucke et al., 2005	Kalabsha, Egypt	II	oolitic ironstone	2.8	4.34		257
0.086	Mucke et al., 2005	Kalabsha, Egypt	III	oolitic ironstone	3.37	35.4		240
0.071	Mucke et al., 2005	Agbaja, Nigeria	VII	oolitic ironstone	1.4	36.48		361
[truncated: 254 more rows]
