# Supplementary material for: Evolution of the molybdenum and vanadium cycles through time and their impact on ancient nitrogen fixation
Source: Research Square preprint supplement (doi:10.21203/rs.3.rs-7237238/v1), 2025-09-01
Supplement: Supplementary file 3 [file e67c3e6a0f11a6742dc11f20.xlsx]

## Sheet: Mo
Si	ini (ppm)	equil (ppm)	ads (ppm)
no Si	0.102564	0.0134139	0.0891504			Note: column A specifies the Si concentration in each experimental setting;
no Si	0.483726	0.0342961	0.44943			column B shows the initial Mo concentration measured by the ICP-MS;
no Si	0.948393	0.0938264	0.854567			column C shows the amount of Mo left in the aqueous system after adsorption which is measured by the ICP-MS
no Si	4.83366	0.887308	3.94636			column D is the substraction between column B and column C, which shows the amount of Mo adsorbed
no Si	10.2561	3.66859	6.58755
no Si	0.0867226	0.00651759	0.0802051
no Si	0.423548	0.0383509	0.385197
no Si	0.831238	0.107353	0.723885
no Si	4.30517	1.3463	2.95887
no Si	9.0591	3.98854	5.07056
no Si	13.428	7.14224	6.28574
no Si	17.6403	10.1441	7.49619
2.2 mM Si	0.0943582	0.0906093	0.00374885
2.2 mM Si	0.450126	0.447973	0.00215248
2.2 mM Si	0.900203	0.868381	0.0318221
2.2 mM Si	4.56359	4.33134	0.232257
2.2 mM Si	9.49355	9.00781	0.485744
2.2 mM Si	14.0239	13.3475	0.676313
2.2 mM Si	18.0052	17.2207	0.784426
2.2 mM Si	0.0869658	0.08609	0.000875812
2.2 mM Si	0.422819	0.40929	0.0135295
2.2 mM Si	0.831156	0.803855	0.0273006
2.2 mM Si	4.14831	4.01825	0.130055
2.2 mM Si	8.9657	8.67856	0.287136
2.2 mM Si	13.0213	12.9158	0.10543
2.2 mM Si	17.2939	16.7412	0.552615

## Sheet: V
Si	ini (ppm)	equil (ppm)	ads (ppm)
no Si	0.0856032	0.000373705	0.0852295			Note: column A specifies the Si concentration in each experimental setting;
no Si	0.419643	0.000440266	0.419203			column B shows the initial V concentration measured by the ICP-MS;
no Si	0.840733	0.000483334	0.84025			column C shows the amount of V left in the aqueous system after adsorption which is measured by the ICP-MS
no Si	4.18029	0.0193061	4.16099			column D is the substraction between column B and column C, which shows the amount of V adsorbed
no Si	9.18314	0.157777	9.02536
no Si	13.2152	0.23745	12.9778
no Si	17.3398	0.468698	16.8711
no Si	0.0842383	0.000408799	0.0838295
no Si	0.458883	0.000540383	0.458342
no Si	0.781611	0.00077599	0.780835
no Si	4.20629	0.0125733	4.19371
no Si	8.42576	0.10816	8.3176
no Si	13.2375	0.33893	12.8986
no Si	18.1848	0.808082	17.3767
2.2 mM Si	0.0865894	0.00673249	0.0798569
2.2 mM Si	0.397009	0.0347676	0.362242
2.2 mM Si	0.787096	0.0745462	0.71255
2.2 mM Si	4.15607	0.551462	3.60461
2.2 mM Si	8.73768	0.939847	7.79783
2.2 mM Si	12.7846	2.75973	10.0249
2.2 mM Si	16.7942	3.63068	13.1635
2.2 mM Si	0.0808321	0.0118261	0.069006
2.2 mM Si	0.448789	0.0557297	0.39306
2.2 mM Si	0.773669	0.130257	0.643412
2.2 mM Si	3.8955	0.610649	3.28485
2.2 mM Si	8.47008	1.27396	7.19612
2.2 mM Si	12.5503	2.98664	9.56362
2.2 mM Si	16.4125	3.64671	12.7658

## Sheet: Molar Mo ratio
Fe	mol		Mo ini ppm	Mo ads ppm		Mo ini M	Mo ads in M	Mo ads mol		Mo/Fe molar	equilibrium Mo M	equilibrium Mo molar (uM)			0 Si average	Mo/Fe molar	std	equilibrium Mo molar (uM)	std
0.1mL*1M	0.0001	no Si	0.102564	0.0891504		1.06894e-06	9.29134e-07	4.1811e-08		0.00041811	1.39801e-07	0.139801				0.000397134	2.09766e-05	0.103864	0.0359371		**Highlighted data are used for linear regression
		no Si	0.483726	0.44943		5.04144e-06	4.684e-06	2.1078e-07		0.0021078	3.57437e-07	0.357437				0.00195718	0.000150623	0.378567	0.0211296		Note: the diagram below is different with the inset of Fig. 2A because the diagram below shows the range from 0.000397 to 0.0037 while the inset of Fig.2A shows the whole range.
		no Si	0.948393	0.854567		9.88424e-06	8.90637e-06	4.00787e-07		0.00400787	9.77868e-07	0.977868				0.00370142	0.000306444	1.04836	0.0704878
		no Si	4.83366	3.94636		5.03769e-05	4.11293e-05	1.85082e-06		0.0185082	9.2476e-06	9.2476				0.0161926	0.00231562	11.6394	2.39183
		no Si	10.2561	6.58755		0.00010689	6.86561e-05	3.08952e-06		0.0308952	3.82344e-05	38.2344				0.0273379	0.00355729	39.9017	1.66724
		no Si	0.0867226	0.0802051		9.03832e-07	8.35905e-07	3.76157e-08		0.000376157	6.79269e-08	0.0679269				0.0294798	0	74.4371	0
		no Si	0.423548	0.385197		4.41426e-06	4.01456e-06	1.80655e-07		0.00180655	3.99696e-07	0.399696				0.0351567	0	105.723	0
		no Si	0.831238	0.723885		8.66325e-06	7.5444e-06	3.39498e-07		0.00339498	1.11884e-06	1.11884
		no Si	4.30517	2.95887		4.48689e-05	3.08377e-05	1.38769e-06		0.0138769	1.40313e-05	14.0313
		no Si	9.0591	5.07056		9.44148e-05	5.28459e-05	2.37806e-06		0.0237806	4.15689e-05	41.5689
		no Si	13.428	6.28574		0.000139948	6.55106e-05	2.94798e-06		0.0294798	7.44371e-05	74.4371
		no Si	17.6403	7.49619		0.000183849	7.8126e-05	3.51567e-06		0.0351567	0.000105723	105.723
		2.2 mM Si	0.0943582	0.00374885		9.8341e-07	3.90708e-08	1.75819e-09		1.75819e-05	9.44339e-07	0.944339
		2.2 mM Si	0.450126	0.00215248		4.69126e-06	2.24333e-08	1.0095e-09		1.0095e-05	4.66882e-06	4.66882
		2.2 mM Si	0.900203	0.0318221		9.382e-06	3.31653e-07	1.49244e-08		0.000149244	9.05035e-06	9.05035			2.2mM Si average	1.08447e-05	6.73718e-06	0.920789	0.0235503		**Highlighted data are used for linear regression
		2.2 mM Si	4.56359	0.232257		4.75622e-05	2.4206e-06	1.08927e-07		0.00108927	4.51416e-05	45.1416				3.67737e-05	2.66787e-05	4.46724	0.201583
		2.2 mM Si	9.49355	0.485744		9.89427e-05	5.06247e-06	2.27811e-07		0.00227811	9.38803e-05	93.8803				0.000138641	1.06028e-05	8.7141	0.336247
		2.2 mM Si	14.0239	0.676313		0.000146158	7.0486e-06	3.17187e-07		0.00317187	0.000139109	139.109				0.000849612	0.000239659	43.5101	1.63149
		2.2 mM Si	18.0052	0.784426		0.000187652	8.17536e-06	3.67891e-07		0.00367891	0.000179476	179.476				0.00181238	0.00046573	92.1645	1.71573
		2.2 mM Si	0.0869658	0.000875812		9.06366e-07	9.1278e-09	4.10751e-10		4.10751e-06	8.97238e-07	0.897238				0.00183316	0.00133871	136.86	2.24961
		2.2 mM Si	0.422819	0.0135295		4.40666e-06	1.41005e-07	6.34524e-09		6.34524e-05	4.26566e-06	4.26566				0.00313532	0.000543589	176.978	2.4987
		2.2 mM Si	0.831156	0.0273006		8.66238e-06	2.84529e-07	1.28038e-08		0.000128038	8.37785e-06	8.37785
		2.2 mM Si	4.14831	0.130055		4.32341e-05	1.35545e-06	6.09952e-08		0.000609952	4.18786e-05	41.8786
		2.2 mM Si	8.9657	0.287136		9.34413e-05	2.99256e-06	1.34665e-07		0.00134665	9.04488e-05	90.4488
		2.2 mM Si	13.0213	0.10543		0.000135709	1.0988e-06	4.94459e-08		0.000494459	0.00013461	134.61
		2.2 mM Si	17.2939	0.552615		0.000180238	5.75941e-06	2.59173e-07		0.00259173	0.000174479	174.479

## Sheet: Molar V ratio
Fe	mol		V ini ppm	V ads ppm		V ini M	V ads in M	V ads mol		V/Fe molar	equilibrium V M	equilibrium V molar (uM)			0 Si average	V/Fe molar	std	equilibrium Mo molar (uM)	std
0.1mL*1M	0.0001	no Si	0.0856032	0.0852295		1.68047e-06	1.67313e-06	7.5291e-08		0.00075291	7.33618e-09	0.000733618				0.000746727	6.18359e-06	0.000768064	3.44465e-05		**Highlighted data are used for linear regression
		no Si	0.419643	0.419203		8.23798e-06	8.22934e-06	3.7032e-07		0.0037032	8.64284e-09	0.000864284				0.00387608	0.000172878	0.000962553	9.82689e-05
		no Si	0.840733	0.84025		1.65044e-05	1.64949e-05	7.4227e-07		0.0074227	9.48829e-09	0.000948829				0.00716027	0.000262434	0.00123609	0.000287256
		no Si	4.18029	4.16099		8.20631e-05	8.16841e-05	3.67578e-06		0.0367578	3.78997e-07	0.0378997				0.0369024	0.000144548	0.0312911	0.00660856
		no Si	9.18314	9.02536		0.000180274	0.000177176	7.97294e-06		0.0797294	3.09732e-06	0.309732				0.0766032	0.00312616	0.26103	0.0487017
		no Si	13.2152	12.9778		0.000259427	0.000254766	1.14645e-05		0.114645	4.66136e-06	0.466136				0.114295	0.000349595	0.565744	0.0996079
		no Si	17.3398	16.8711		0.000340396	0.000331195	1.49038e-05		0.149038	9.20099e-06	0.920099				0.151271	0.00223313	1.25322	0.333121
		no Si	0.0842383	0.0838295		1.65368e-06	1.64565e-06	7.40543e-08		0.000740543	8.02511e-09	0.000802511
		no Si	0.458883	0.458342		9.0083e-06	8.99769e-06	4.04896e-07		0.00404896	1.06082e-08	0.00106082
		no Si	0.781611	0.780835		1.53438e-05	1.53285e-05	6.89784e-07		0.00689784	1.52334e-08	0.00152334
		no Si	4.20629	4.19371		8.25733e-05	8.23265e-05	3.70469e-06		0.0370469	2.46826e-07	0.0246826
		no Si	8.42576	8.3176		0.000165406	0.000163282	7.3477e-06		0.073477	2.12329e-06	0.212329
		no Si	13.2375	12.8986		0.000259865	0.000253212	1.13945e-05		0.113945	6.65352e-06	0.665352
		no Si	18.1848	17.3767		0.000356984	0.00034112	1.53504e-05		0.153504	1.58634e-05	1.58634
		2.2 mM Si	0.0865894	0.0798569		1.69983e-06	1.56767e-06	7.0545e-08		0.00070545	1.32165e-07	0.0132165			2.2mM Si average	0.000657522	4.79279e-05	0.0182161	0.00499963		**Highlighted data are used for linear regression
		2.2 mM Si	0.397009	0.362242		7.79366e-06	7.11114e-06	3.20001e-07		0.00320001	6.82521e-07	0.0682521				0.00333614	0.000136122	0.0888273	0.0205752
		2.2 mM Si	0.787096	0.71255		1.54514e-05	1.3988e-05	6.29461e-07		0.00629461	1.46341e-06	0.146341				0.00598923	0.000305382	0.201024	0.0546827
		2.2 mM Si	4.15607	3.60461		8.15876e-05	7.07619e-05	3.18428e-06		0.0318428	1.08257e-05	1.08257				0.0304305	0.00141235	1.14067	0.0580945
		2.2 mM Si	8.73768	7.79783		0.000171529	0.000153079	6.88854e-06		0.0688854	1.84501e-05	1.84501				0.0662277	0.00265773	2.17296	0.327947
		2.2 mM Si	12.7846	10.0249		0.000250974	0.000196798	8.85591e-06		0.0885591	5.41762e-05	5.41762				0.0865217	0.00203743	5.64033	0.222714
		2.2 mM Si	16.7942	13.1635		0.000329686	0.000258412	1.16285e-05		0.116285	7.12737e-05	7.12737				0.114529	0.00175679	7.14311	0.0157344
		2.2 mM Si	0.0808321	0.069006		1.58681e-06	1.35465e-06	6.09594e-08		0.000609594	2.32158e-07	0.0232158
		2.2 mM Si	0.448789	0.39306		8.81015e-06	7.71613e-06	3.47226e-07		0.00347226	1.09403e-06	0.109403
		2.2 mM Si	0.773669	0.643412		1.51878e-05	1.26308e-05	5.68385e-07		0.00568385	2.55707e-06	0.255707
		2.2 mM Si	3.8955	3.28485		7.64724e-05	6.44848e-05	2.90181e-06		0.0290181	1.19876e-05	1.19876
		2.2 mM Si	8.47008	7.19612		0.000166276	0.000141267	6.357e-06		0.06357	2.5009e-05	2.5009
		2.2 mM Si	12.5503	9.56362		0.000246373	0.000187743	8.44843e-06		0.0844843	5.86305e-05	5.86305
		2.2 mM Si	16.4125	12.7658		0.000322192	0.000250604	1.12772e-05		0.112772	7.15884e-05	7.15884
